# Supplementary material for: Alternative and efficient one-pot three-component synthesis of substituted 2-aryl-4-styrylquinazolines/4-styrylquinazolines from synthetically available 1-(2-aminophenyl)-3-arylprop-2-en-1-ones: characterization and evaluation of their antiproliferative activities
Source: Royal Society of Chemistry journal article supplement (doi:10.1039/d4ra03702b), 2024-01-01
Supplement: d4ra03702b1.pdf [file d4ra03702b1.pdf]

## **An alternative and efficient one-pot three-component synthesis of substituted 2-aryl-4-styrylquinazolines/4-styrylquinazolines from synthetically available 1-(2-aminophenyl)-3-arylprop-2-en-1-ones. Characterization and evaluation of their antiproliferative activity**

Diego Fernando Rodríguez,<sup>1</sup> Kelly Johanna Lipez,<sup>1</sup> Elena Stashenko,<sup>2</sup> Iván Díaz,<sup>3</sup> Justo Cobo,<sup>3</sup> Alirio Palma,<sup>1\*</sup>

<sup>1</sup> *Laboratorio de Síntesis Orgánica, Escuela de Química, Universidad Industrial de Santander, AA 678 Bucaramanga, Colombia.*

<sup>2</sup> *National Research Center for the Agroindustrialization of Aromatic and Medicinal Tropical Species (CENIVAM), Universidad Industrial de Santander.*

<sup>3</sup> *Departamento de Química Inorgánica y Orgánica, Universidad de Jaén, España.*

*e-mail: [apalma@uis.edu.co](mailto:apalma@uis.edu.co)*

## **Supplementary Information**

# (E)-2-Phenyl-4-styrylquinazoline (3a)

## <sup>1</sup>H NMR spectrum of 3a

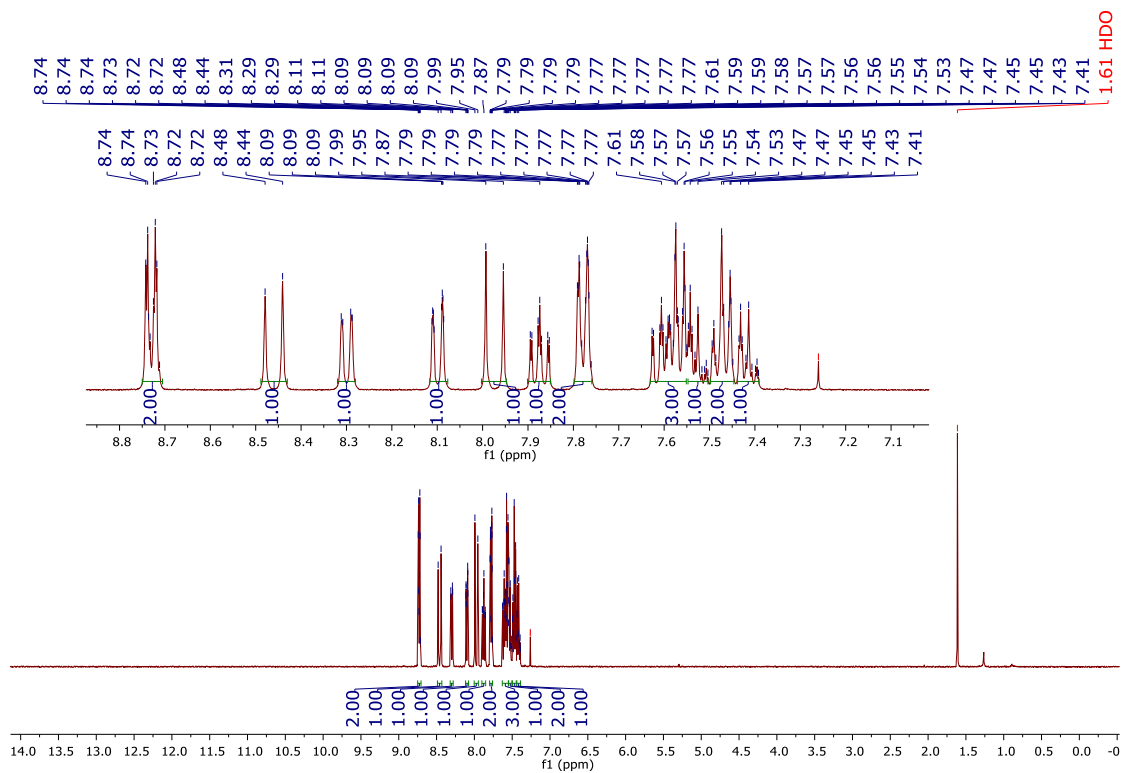

## <sup>13</sup>C NMR spectrum of 3a

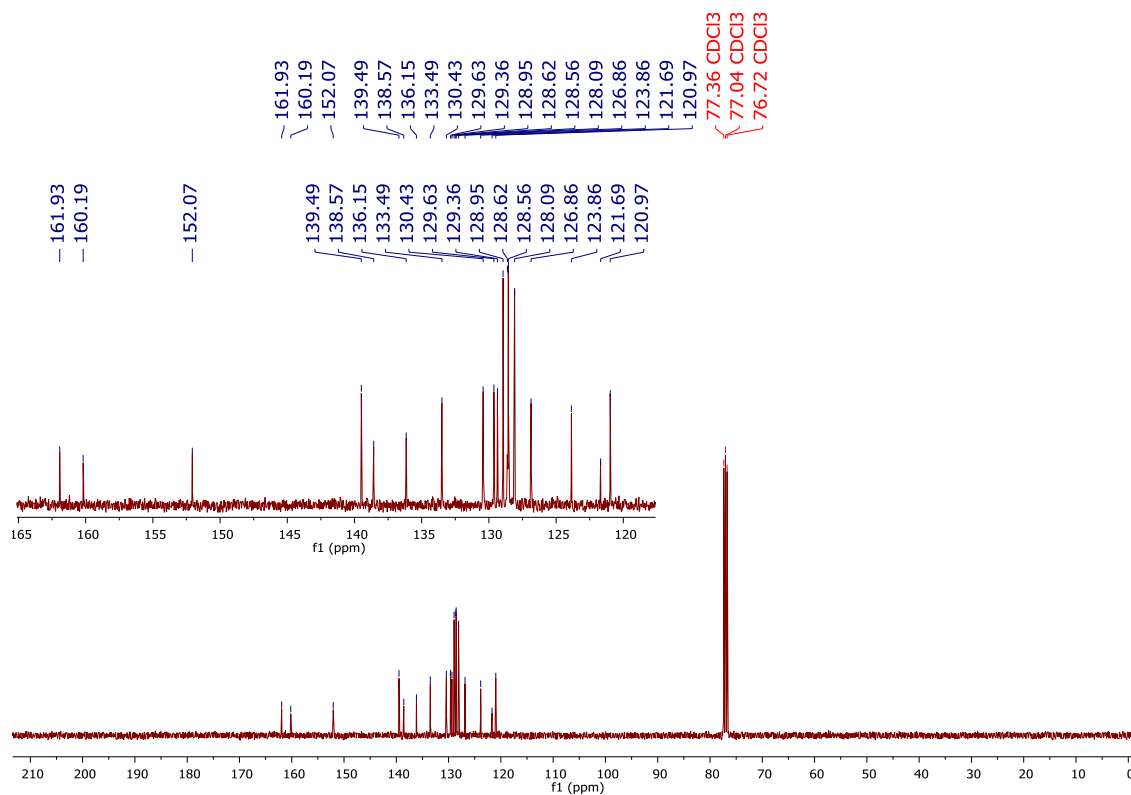

# HRMS spectrum of 3a

MS Zoomed Spectrum

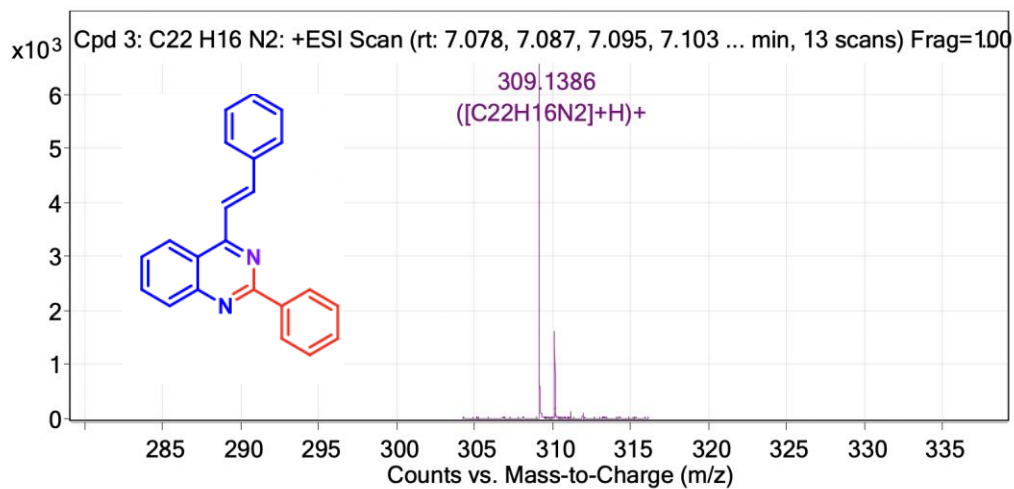

## MS Spectrum Peak List

| m/z      | Calc m/z | Diff(ppm) | z | Abund   | Formula                                        | Ion                |
|----------|----------|-----------|---|---------|------------------------------------------------|--------------------|
| 309.1386 | 309.1386 | 0.14      | 1 | 6573.96 | C <sub>22</sub> H <sub>16</sub> N <sub>2</sub> | (M+H) <sup>+</sup> |
| 310.142  | 310.1418 | -0.48     | 1 | 1670.56 | C <sub>22</sub> H <sub>16</sub> N <sub>2</sub> | (M+H) <sup>+</sup> |
| 311.1408 | 311.145  | 13.56     | 1 | 113.33  | C <sub>22</sub> H <sub>16</sub> N <sub>2</sub> | (M+H) <sup>+</sup> |

--- End Of Report ---

# (E)-4-Styryl-2-(m-tolyl)quinazoline (3b)

## <sup>1</sup>H NMR spectrum of 3b

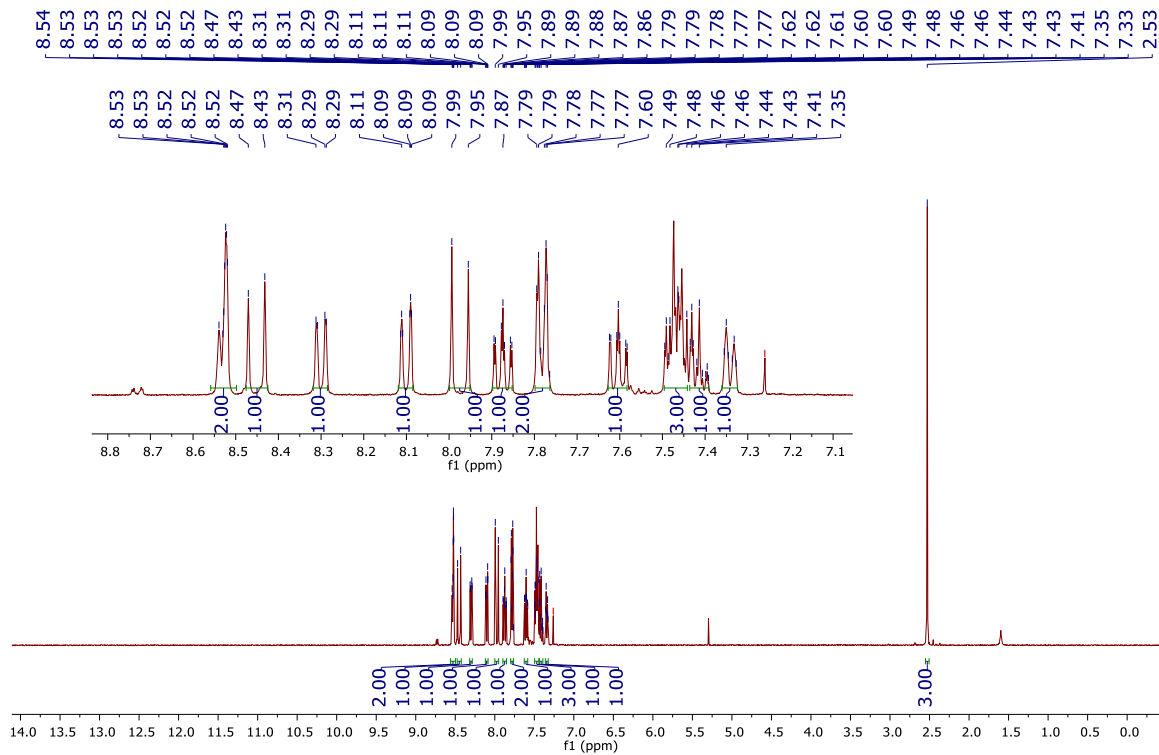

## <sup>13</sup>C NMR spectrum of 3b

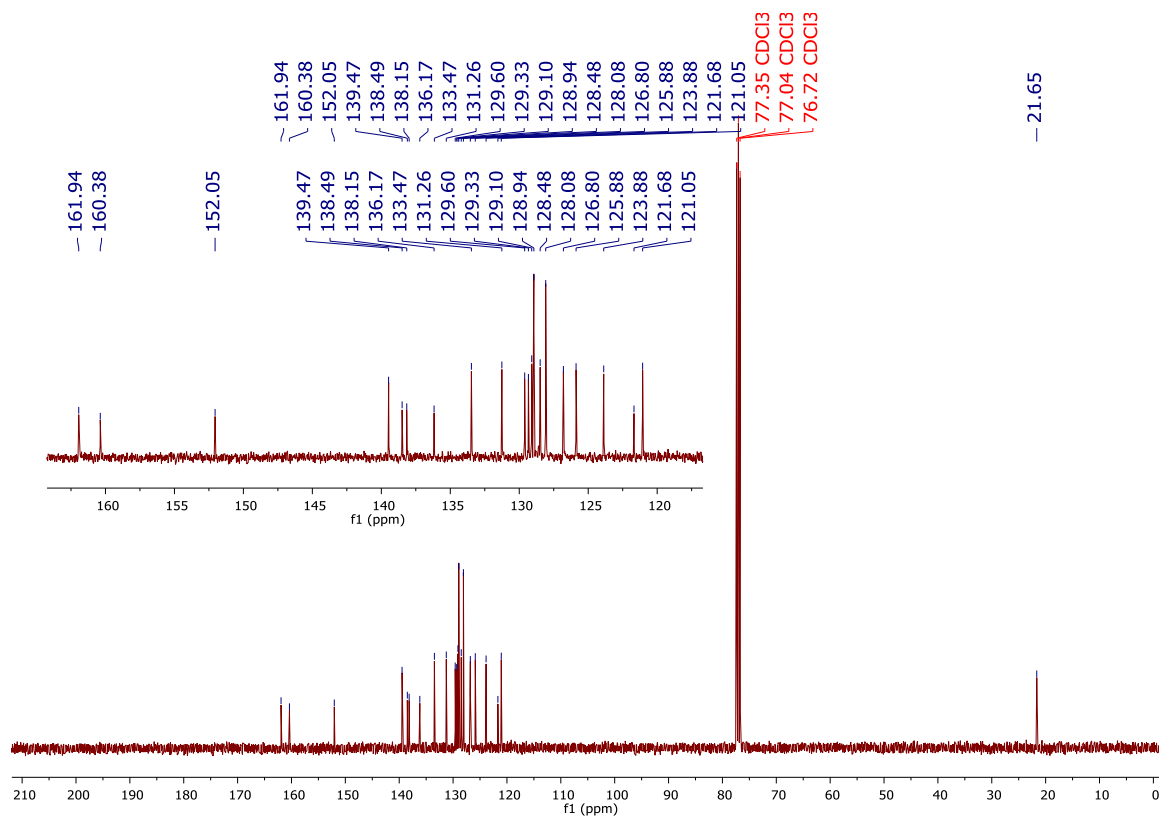



# HRMS spectrum of 3b

MS Zoomed Spectrum

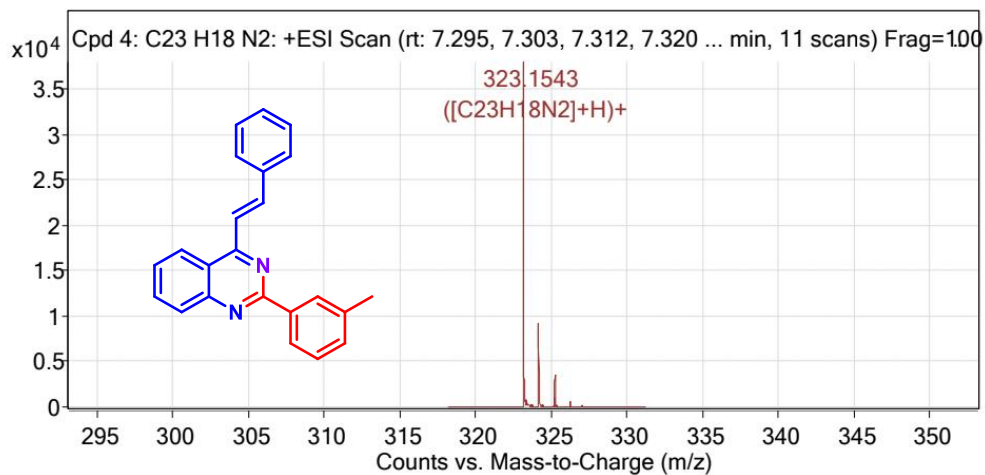

## MS Spectrum Peak List

| m/z      | Calc m/z | Diff(ppm) | z | Abund    | Formula                                        | Ion                |
|----------|----------|-----------|---|----------|------------------------------------------------|--------------------|
| 323.1543 | 323.1543 | -0.08     | 1 | 38167.41 | C <sub>23</sub> H <sub>18</sub> N <sub>2</sub> | (M+H) <sup>+</sup> |
| 324.1573 | 324.1575 | 0.68      | 1 | 9464.11  | C <sub>23</sub> H <sub>18</sub> N <sub>2</sub> | (M+H) <sup>+</sup> |
| 325.1631 | 325.1607 | -7.36     | 1 | 780.06   | C <sub>23</sub> H <sub>18</sub> N <sub>2</sub> | (M+H) <sup>+</sup> |
| 326.167  | 326.1639 | -9.73     | 1 | 27.8     | C <sub>23</sub> H <sub>18</sub> N <sub>2</sub> | (M+H) <sup>+</sup> |

--- End Of Report ---



# HRMS spectrum of 3c

MS Zoomed Spectrum

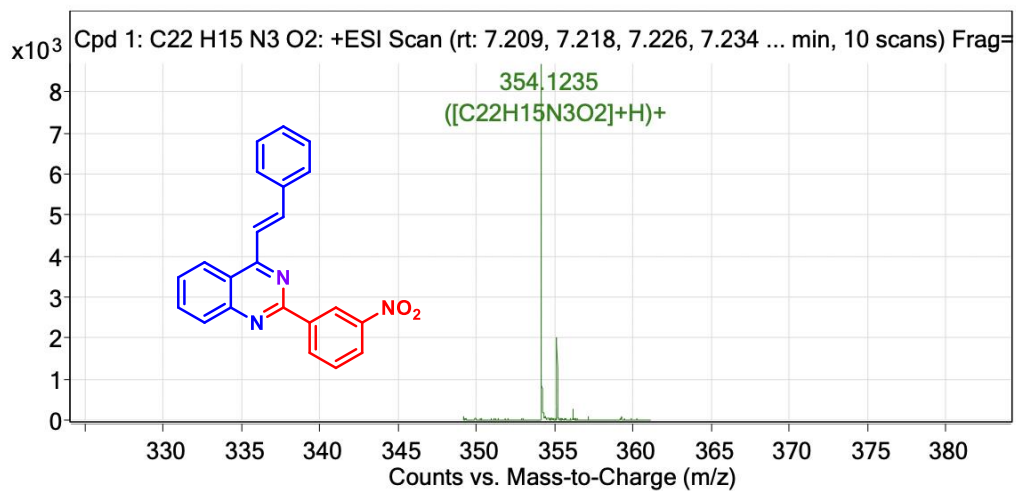

## MS Spectrum Peak List

| m/z      | Calc m/z | Diff(ppm) | z | Abund   | Formula                                                       | Ion                |
|----------|----------|-----------|---|---------|---------------------------------------------------------------|--------------------|
| 354.1235 | 354.1237 | 0.51      | 1 | 8798.42 | C <sub>22</sub> H <sub>15</sub> N <sub>3</sub> O <sub>2</sub> | (M+H) <sup>+</sup> |
| 355.1274 | 355.1268 | -1.79     | 1 | 2072.13 | C <sub>22</sub> H <sub>15</sub> N <sub>3</sub> O <sub>2</sub> | (M+H) <sup>+</sup> |
| 356.1313 | 356.1297 | -4.51     | 1 | 269.41  | C <sub>22</sub> H <sub>15</sub> N <sub>3</sub> O <sub>2</sub> | (M+H) <sup>+</sup> |

--- End Of Report ---

# (E)-4-Styryl-2-(4-(trifluoromethyl)phenyl)quinazoline (3d)

## <sup>1</sup>H NMR spectrum of 3d

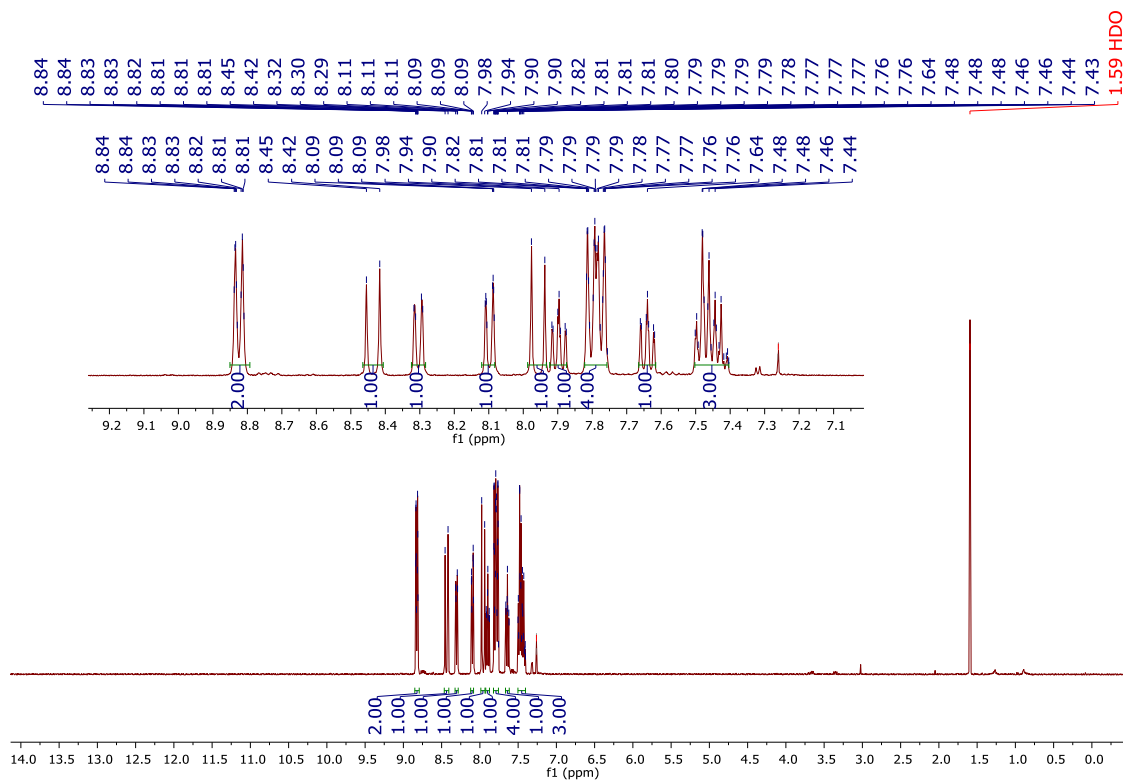

## <sup>13</sup>C NMR spectrum of 3d

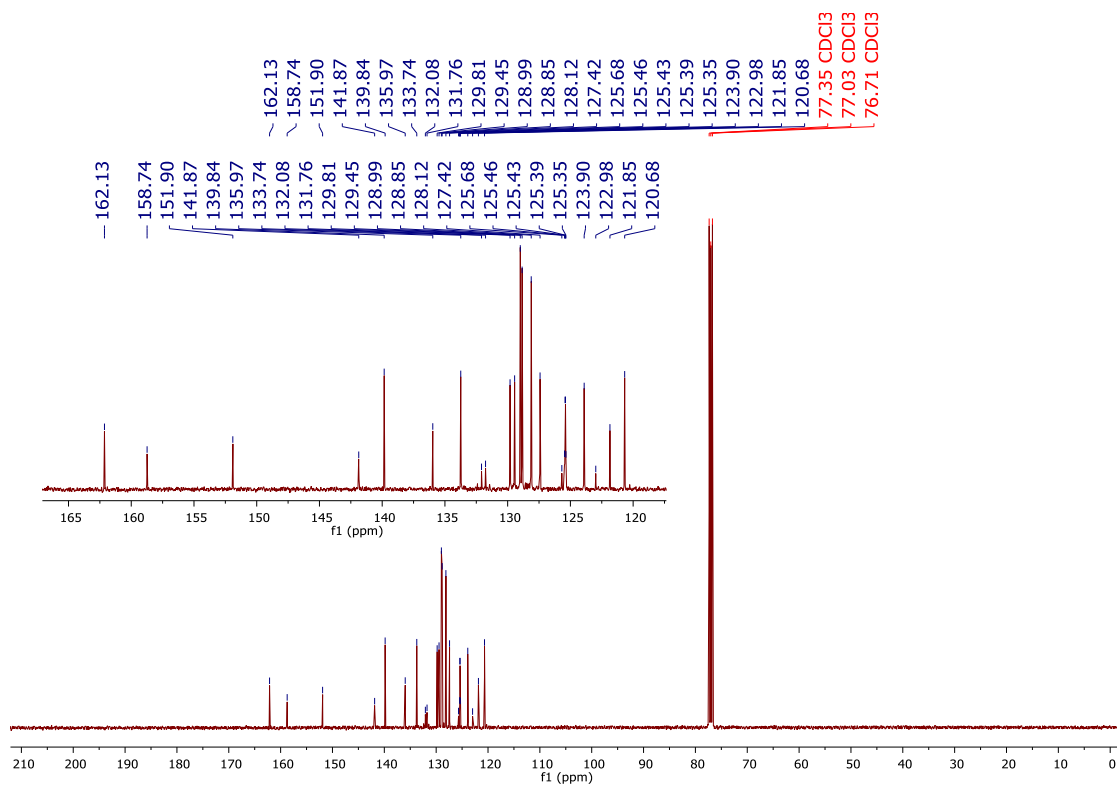

## HRMS spectrum of 3d

MS Zoomed Spectrum

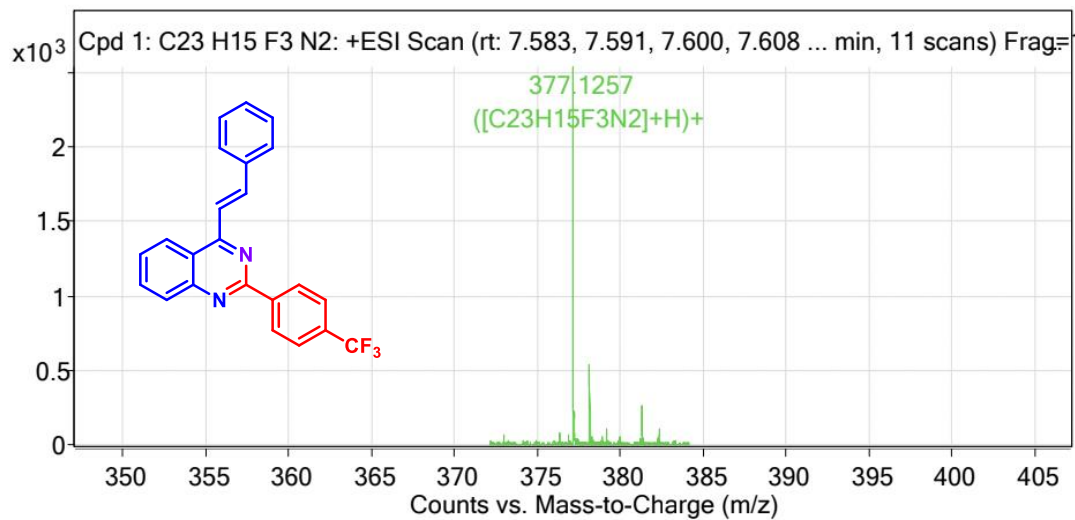

### MS Spectrum Peak List

| m/z      | Calc m/z | Diff(ppm) | z | Abund   | Formula                                                       | Ion                |
|----------|----------|-----------|---|---------|---------------------------------------------------------------|--------------------|
| 377.1257 | 377.126  | 0.77      | 1 | 2647.16 | C <sub>23</sub> H <sub>15</sub> F <sub>3</sub> N <sub>2</sub> | (M+H) <sup>+</sup> |
| 378.1296 | 378.1292 | -0.98     | 1 | 622.54  | C <sub>23</sub> H <sub>15</sub> F <sub>3</sub> N <sub>2</sub> | (M+H) <sup>+</sup> |
| 379.134  | 379.1324 | -4.22     | 1 | 95.75   | C <sub>23</sub> H <sub>15</sub> F <sub>3</sub> N <sub>2</sub> | (M+H) <sup>+</sup> |

--- End Of Report ---

# (E)-4-Styryl-2-(3,4,5-trimethoxyphenyl)quinazoline (3e)

## <sup>1</sup>H NMR spectrum of 3e

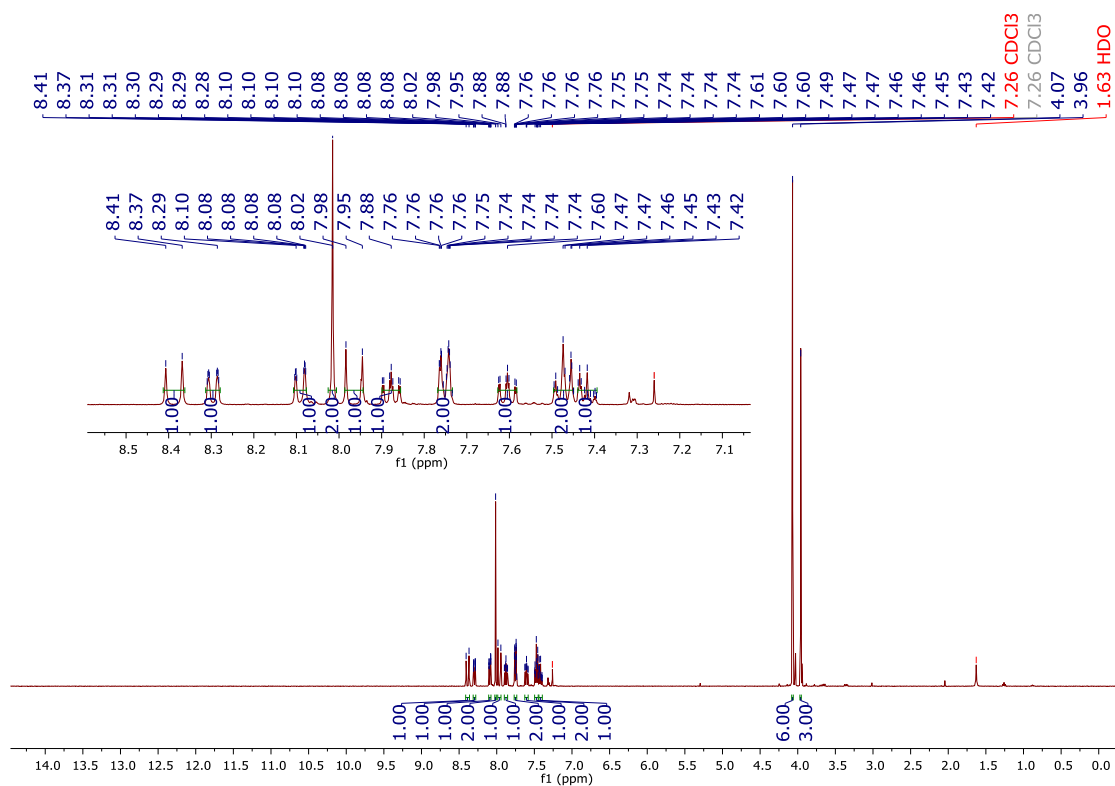

## <sup>13</sup>C NMR spectrum of 3e

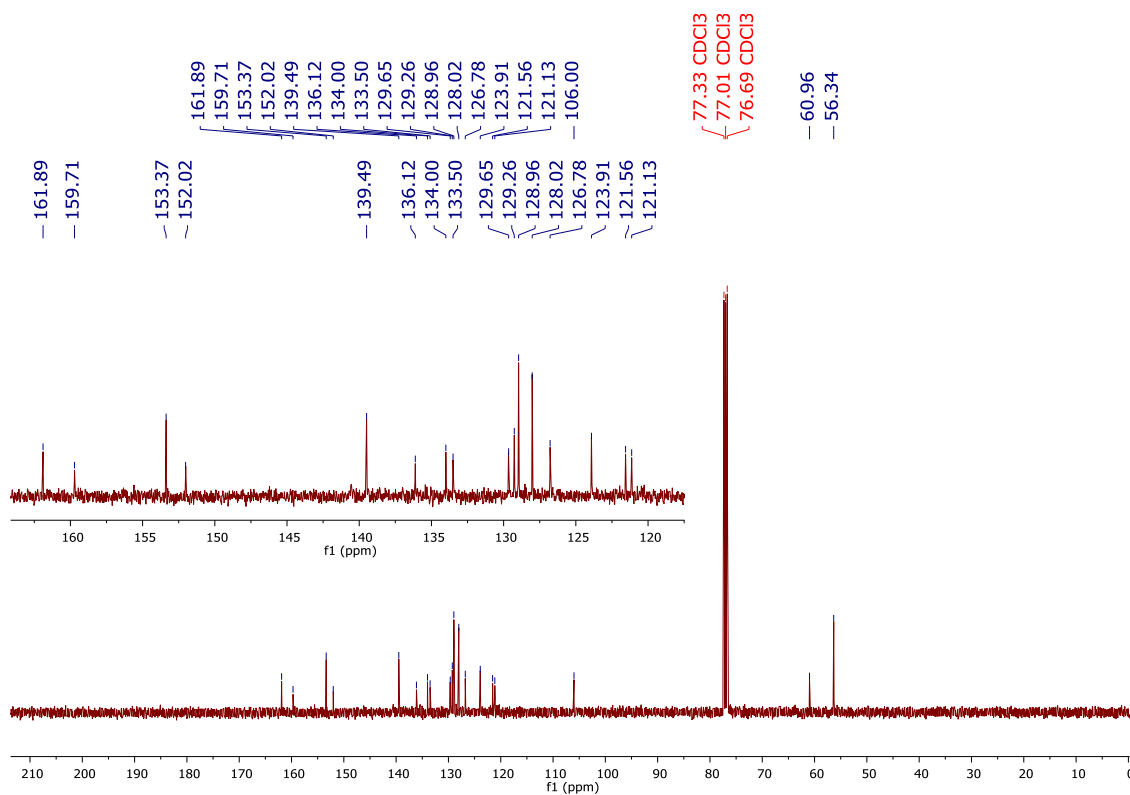

# Chromatogram and HRMS spectrum of 3e

c:\xcalibur\data\220614ag\992734-31-eb

06/15/22 21:26:18

RT: 0.00 - 15.00 SM: 15G

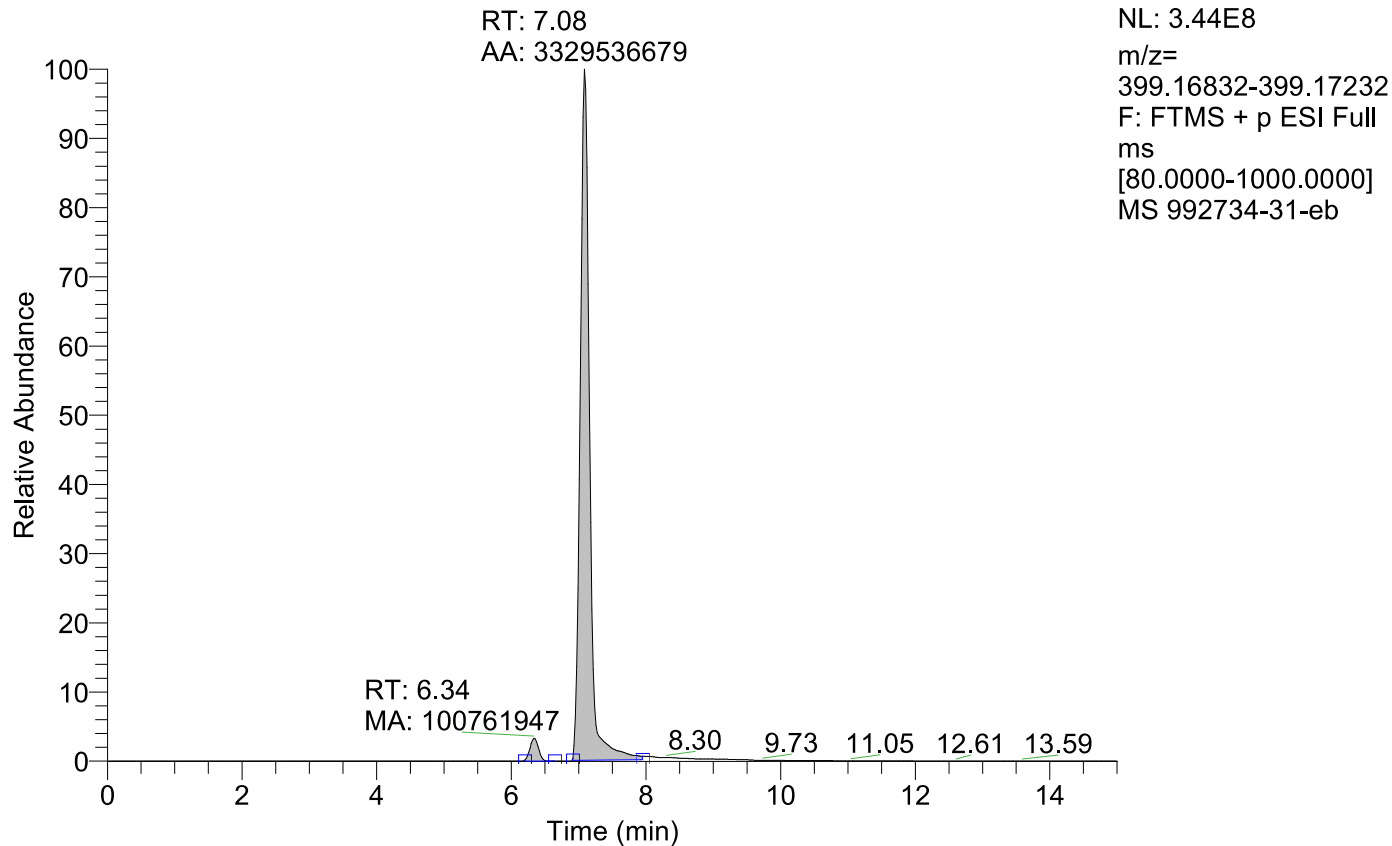

992734-31-eb #1794 RT: 7.08 AV: 1 NL: 7.58E8

T: FTMS + p ESI Full ms [80.0000-1000.0000]

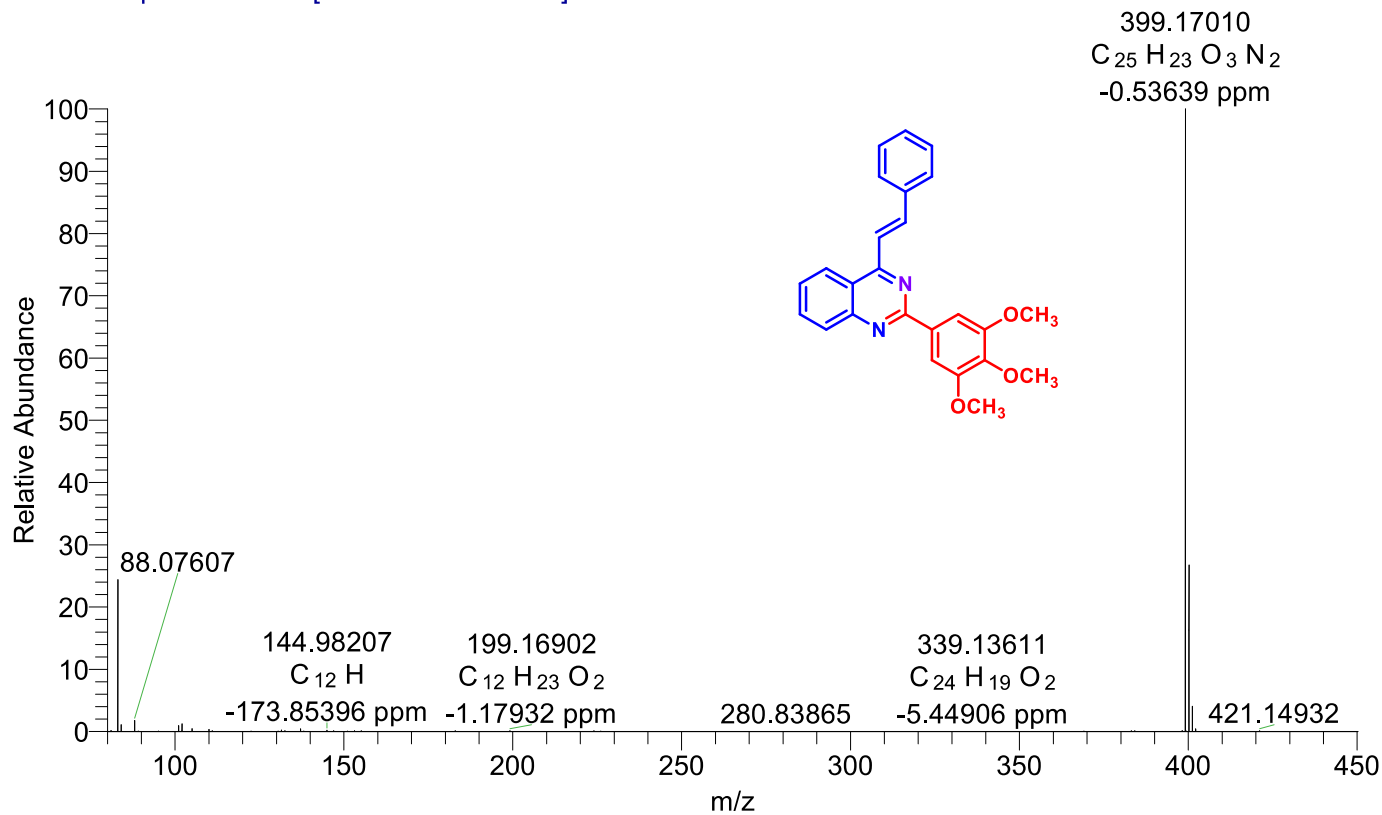

# (E)-4-Styryl-2-(5-methylfuran-2-yl)quinazoline (3f)

## <sup>1</sup>H NMR spectrum of 3f

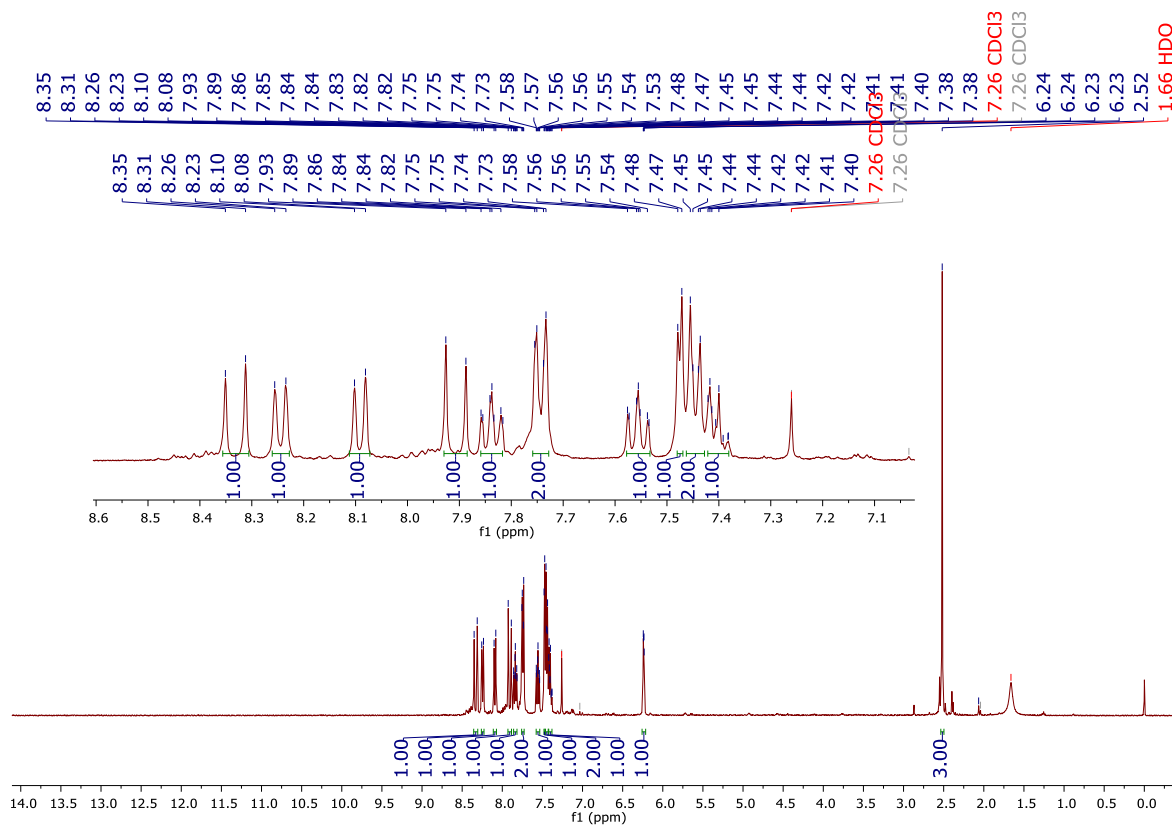

## <sup>13</sup>C NMR spectrum of 3f

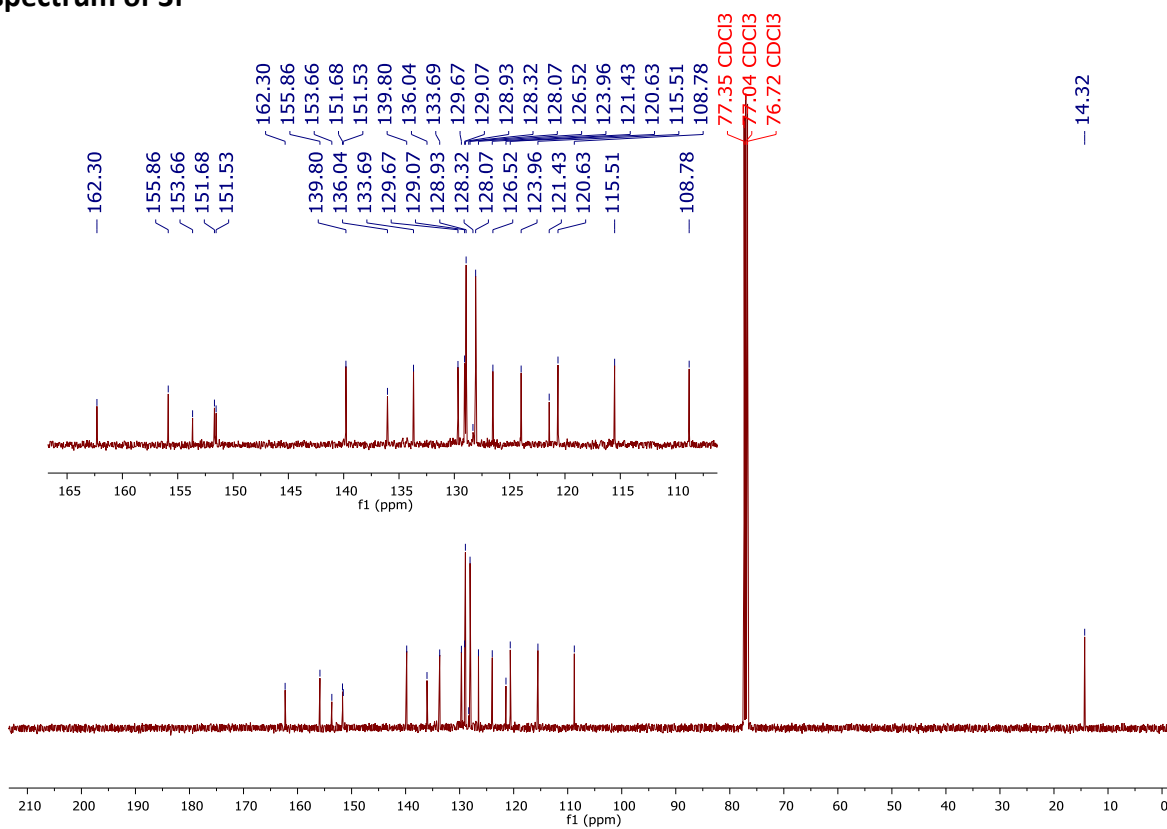



# Chromatogram and HRMS spectra of 3f

c:\xcalibur\data\220614ag\992734-32-eb

06/15/22 22:19:13

RT: 0.00 - 15.00 SM: 15G

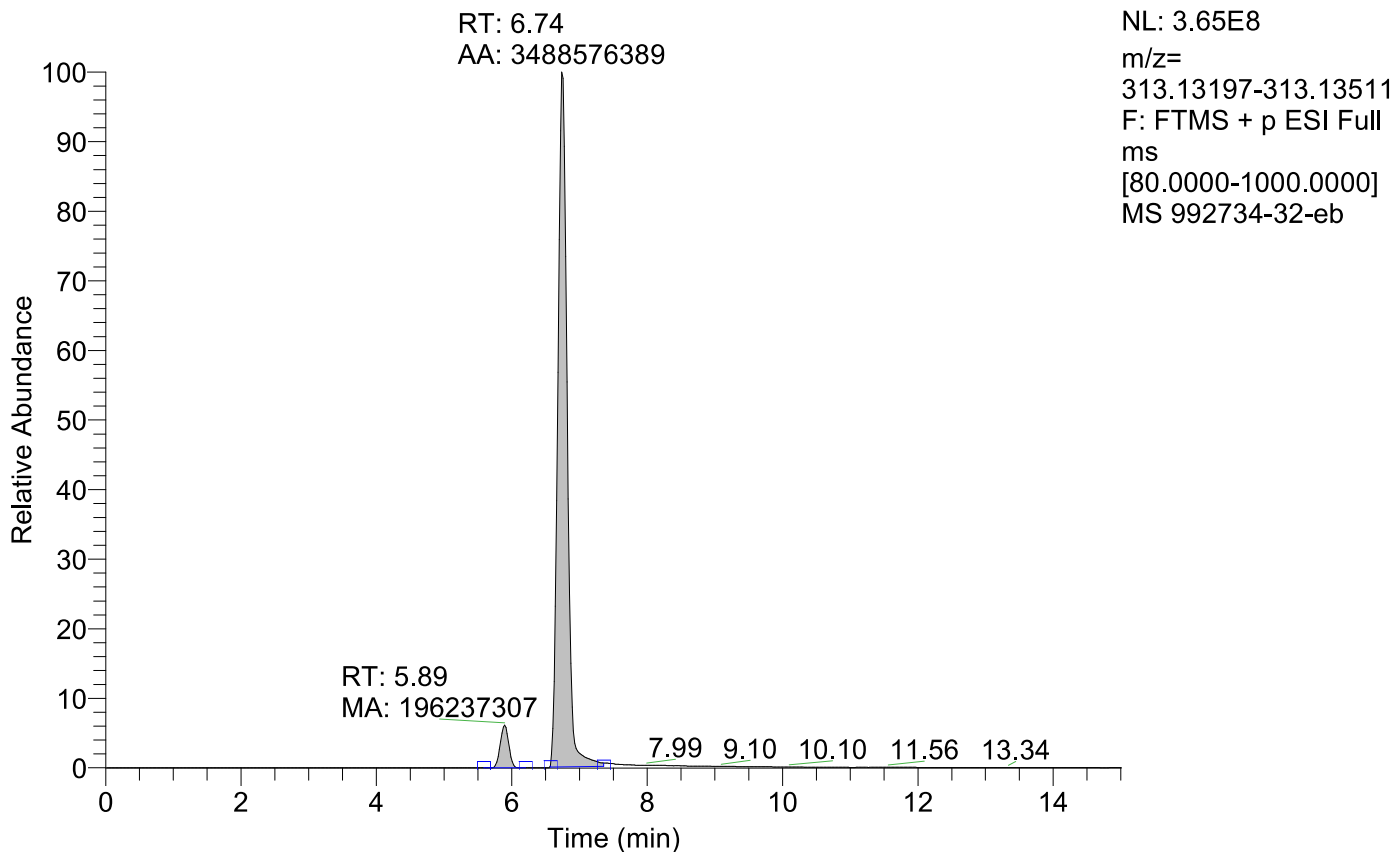

992734-32-eb #1704 RT: 6.74 AV: 1 NL: 7.72E8  
T: FTMS + p ESI Full ms [80.0000-1000.0000]

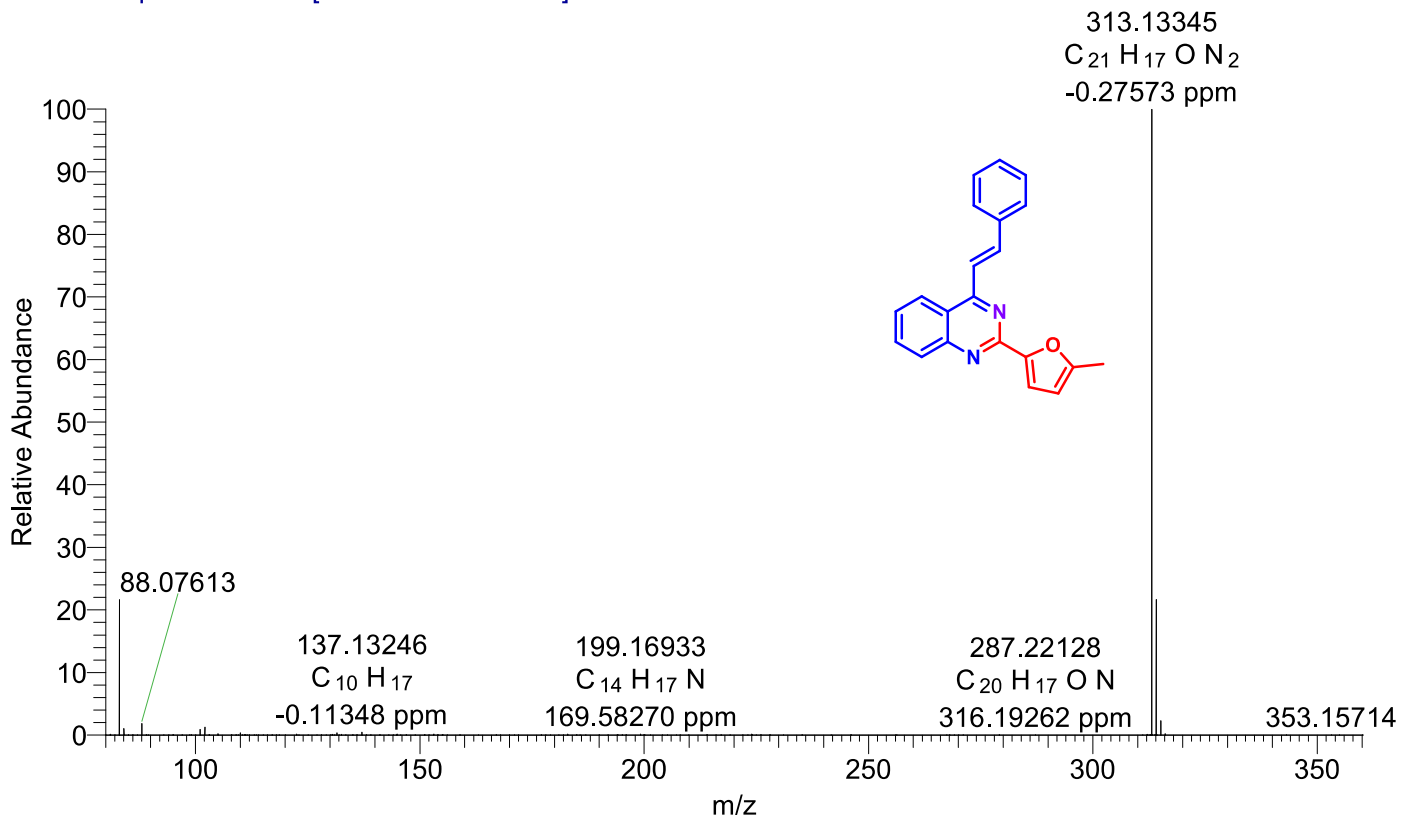

# (E)-4-Styryl-2-(furan-3-yl)quinazoline (3g)

## <sup>1</sup>H NMR spectrum of 3g

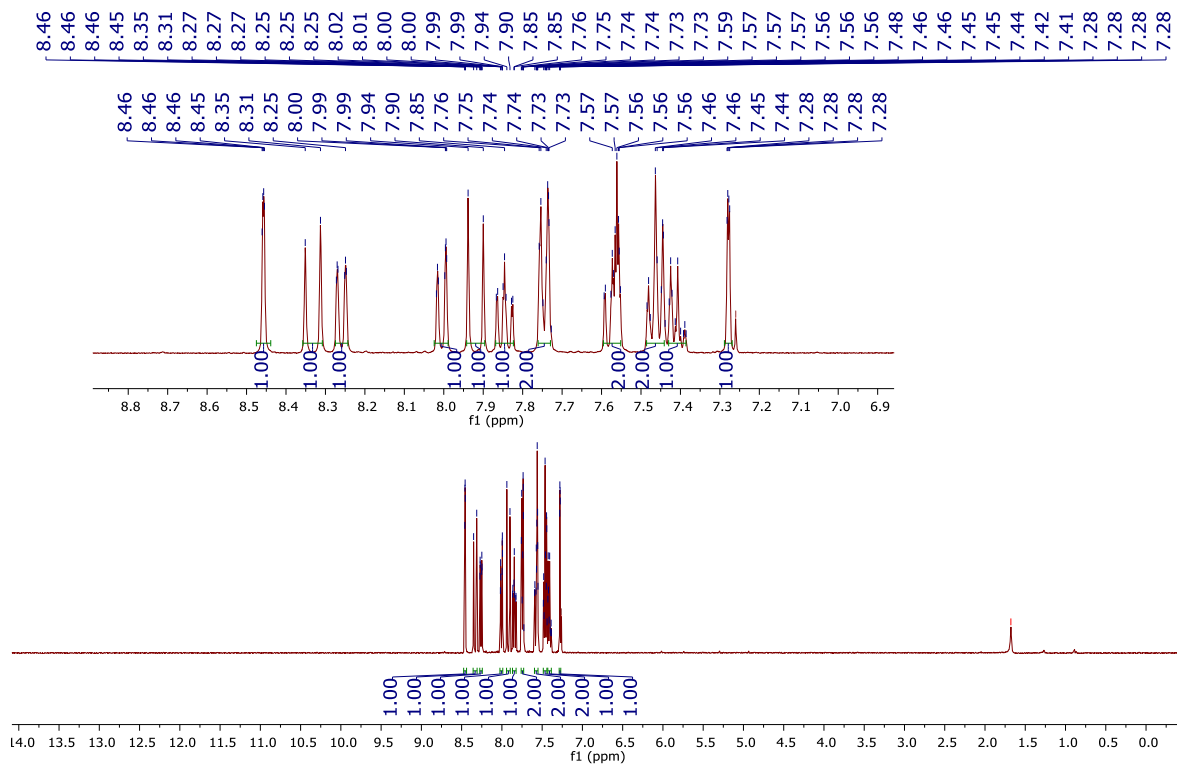

## <sup>13</sup>C NMR spectrum of 3g

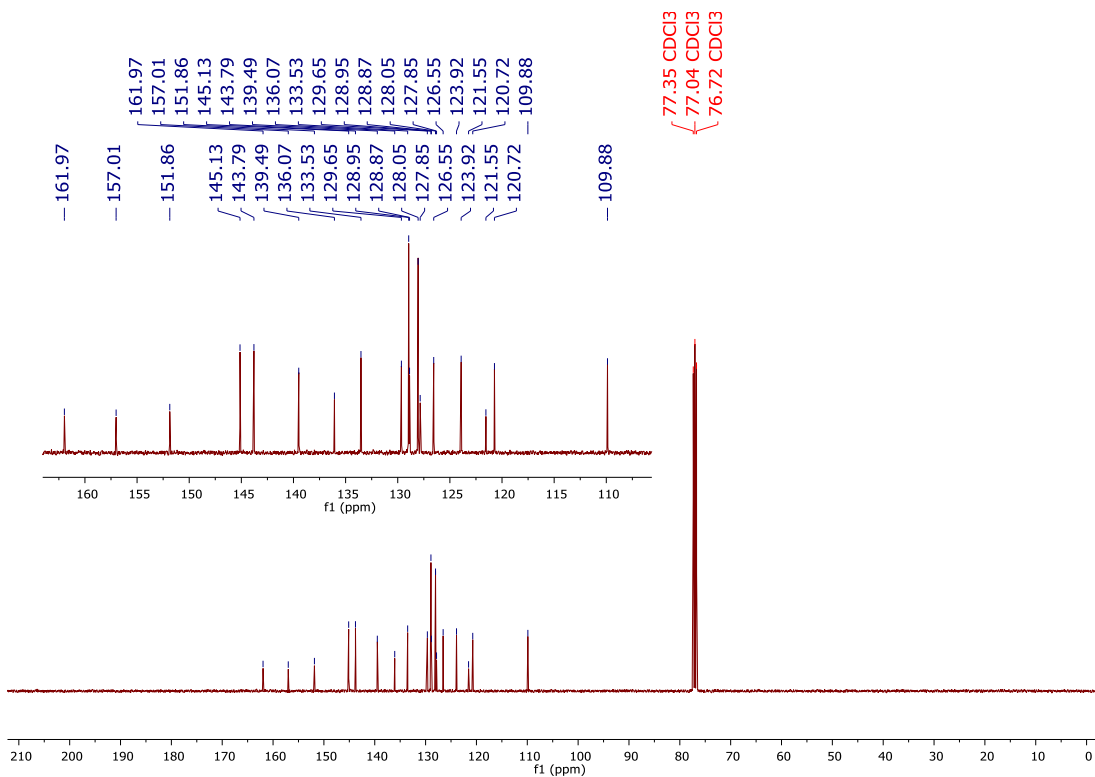

# HRMS spectrum of 3g

MS Zoomed Spectrum

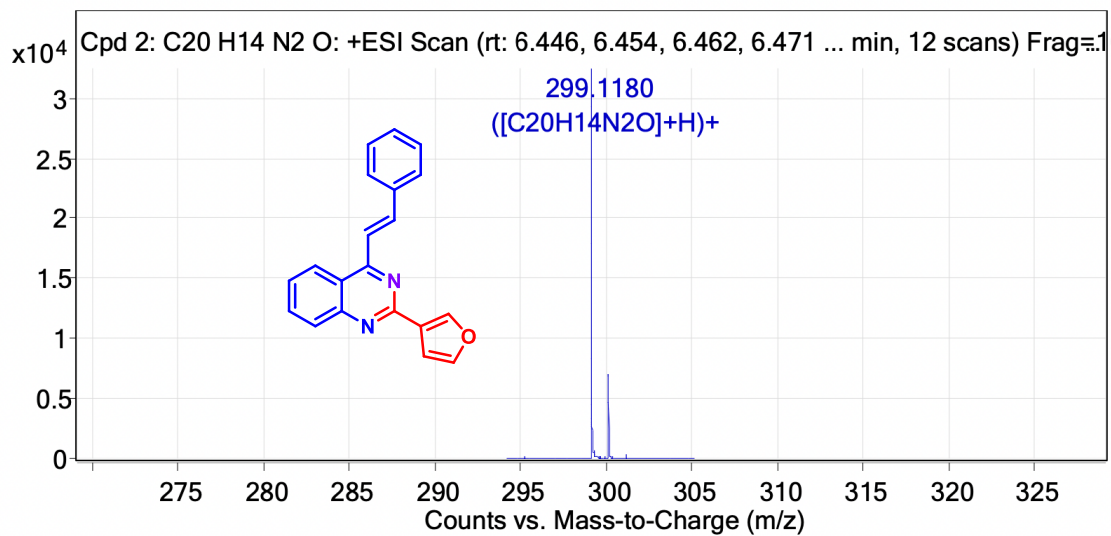

## MS Spectrum Peak List

| m/z      | Calc m/z | Diff(ppm) | z | Abund    | Formula                                          | Ion                |
|----------|----------|-----------|---|----------|--------------------------------------------------|--------------------|
| 299.118  | 299.1179 | -0.41     | 1 | 32864.48 | C <sub>20</sub> H <sub>14</sub> N <sub>2</sub> O | (M+H) <sup>+</sup> |
| 300.1212 | 300.1211 | -0.43     | 1 | 7266.67  | C <sub>20</sub> H <sub>14</sub> N <sub>2</sub> O | (M+H) <sup>+</sup> |

--- End Of Report ---

# (E)-4-(4-Chlorostyryl)-2-phenylquinazoline (3i)

## <sup>1</sup>H NMR spectrum of 3i

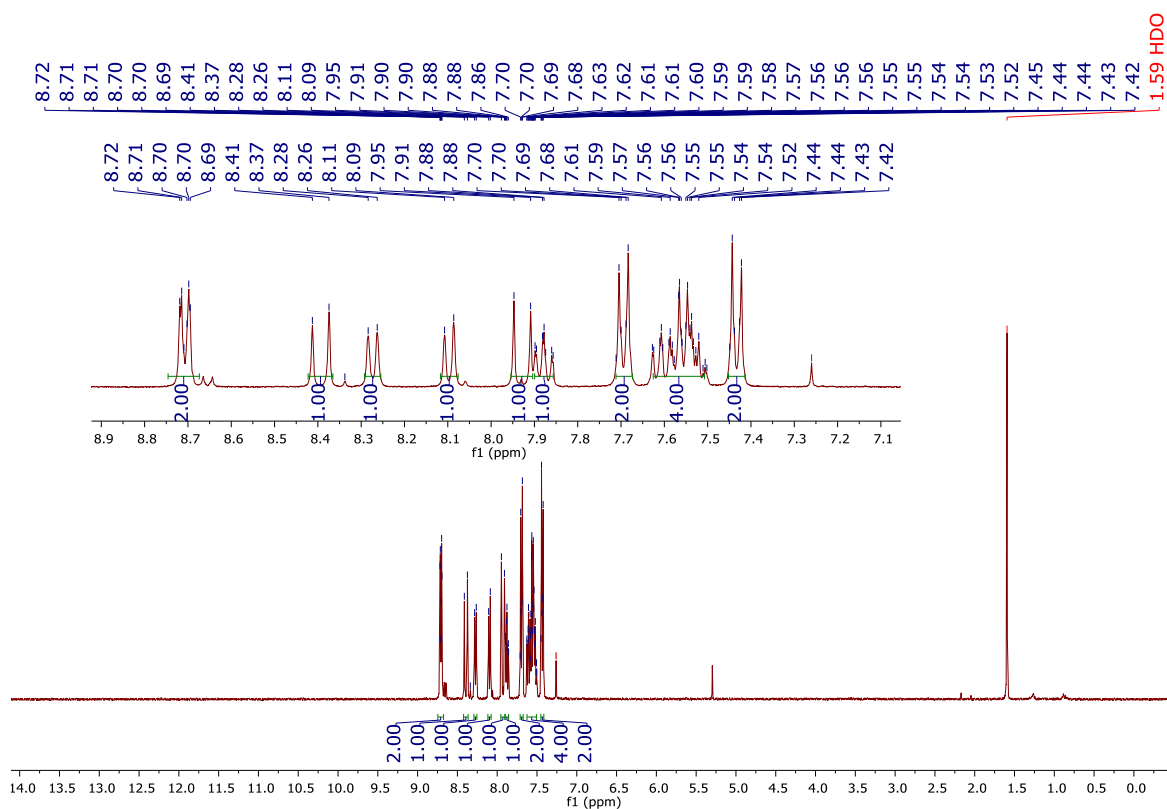

## <sup>13</sup>C NMR spectrum of 3i

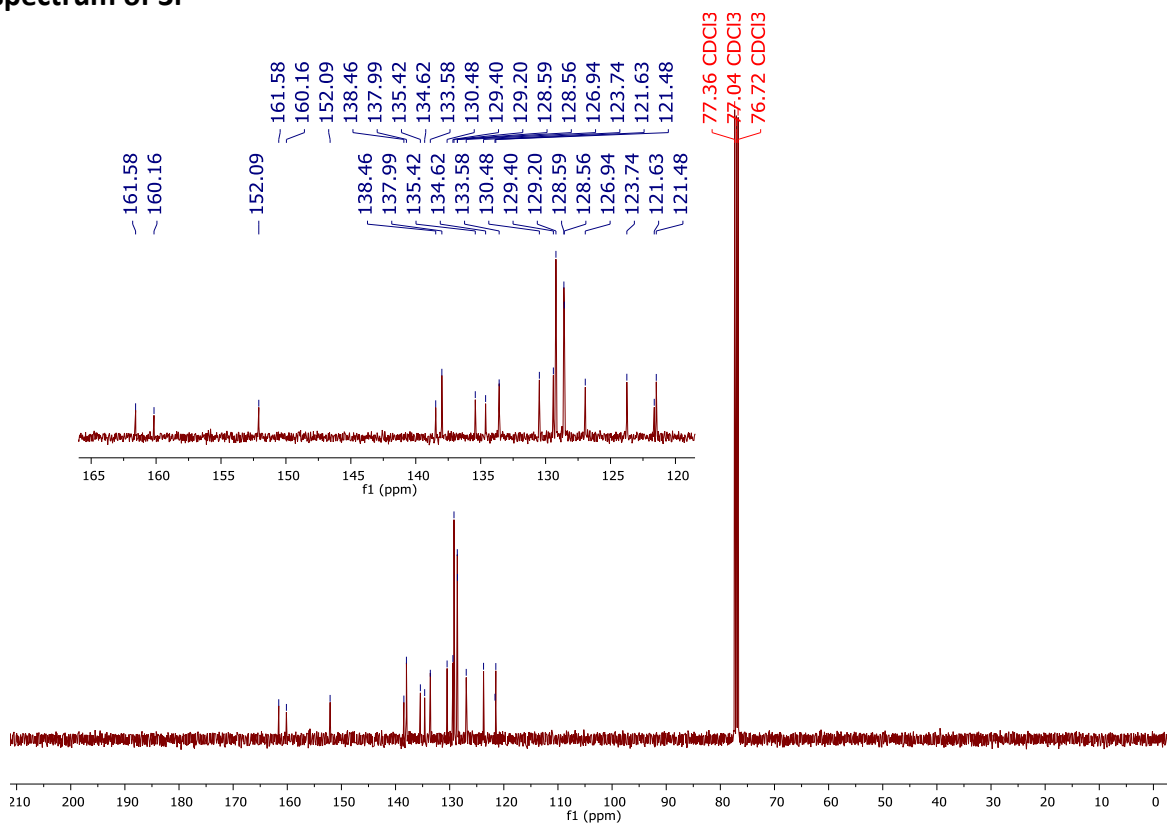

# HRMS spectrum of 3i

MS Zoomed Spectrum

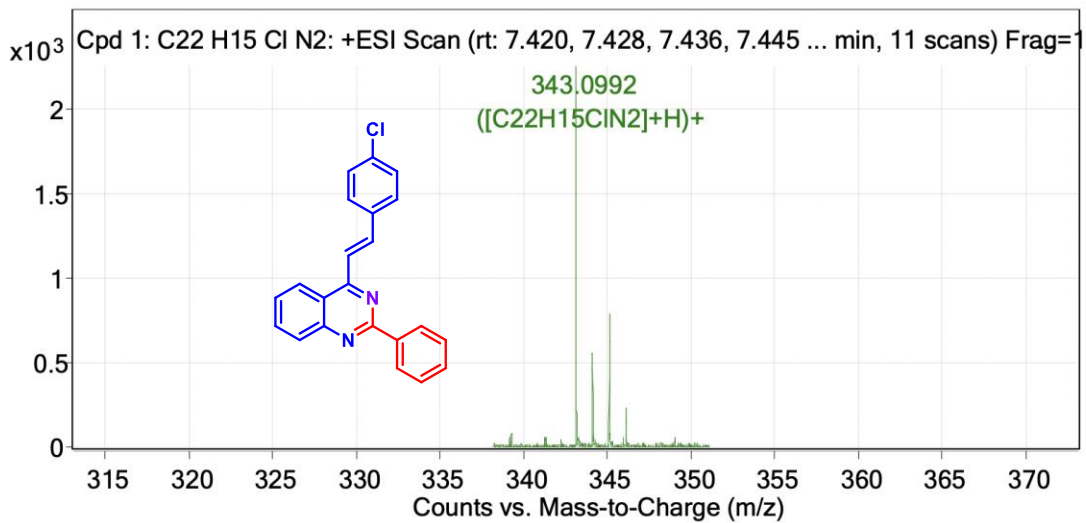

## MS Spectrum Peak List

| m/z      | Calc m/z | Diff(ppm) | z | Abund  | Formula                                          | Ion                |
|----------|----------|-----------|---|--------|--------------------------------------------------|--------------------|
| 343.0992 | 343.0997 | 1.2       | 1 | 2346.7 | C <sub>22</sub> H <sub>15</sub> ClN <sub>2</sub> | (M+H) <sup>+</sup> |
| 344.1035 | 344.1028 | -1.97     | 1 | 625.89 | C <sub>22</sub> H <sub>15</sub> ClN <sub>2</sub> | (M+H) <sup>+</sup> |
| 345.0979 | 345.0975 | -1.11     | 1 | 854.34 | C <sub>22</sub> H <sub>15</sub> ClN <sub>2</sub> | (M+H) <sup>+</sup> |
| 346.099  | 346.1001 | 3.36      | 1 | 191.5  | C <sub>22</sub> H <sub>15</sub> ClN <sub>2</sub> | (M+H) <sup>+</sup> |

--- End Of Report ---

# (E)-4-(4-Trifluoromethylstyryl)-2-phenylquinazoline (3j)

## <sup>1</sup>H NMR spectrum of 3j

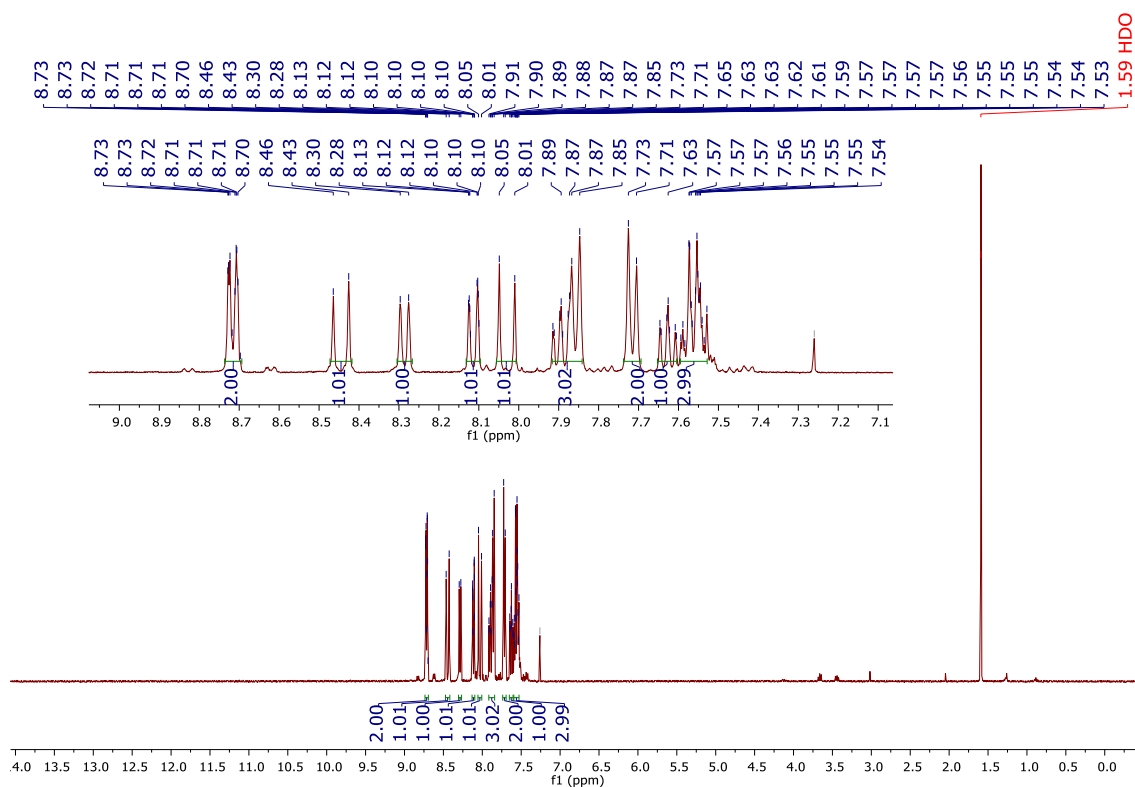

## <sup>13</sup>C NMR spectrum of 3j

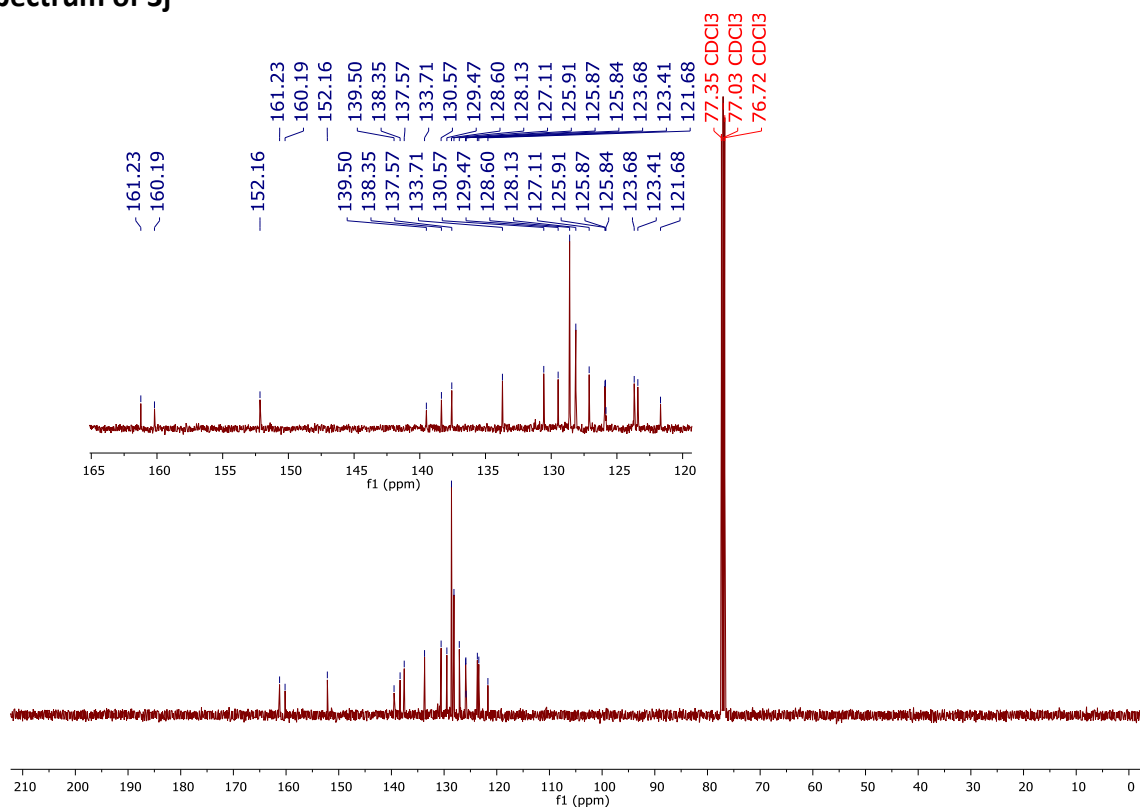

# Chromatogram and HRMS spectrum of 3j

c:\xcalibur\...\221101ag\993103-13-eb

11/02/22 03:00:58

RT: 0.00 - 15.01 SM: 13G

NL: 1.00E6  
m/z=  
377.12412-377.12790 F:  
FTMS + p ESI Full ms  
[80.0000-1000.0000]  
MS ste13

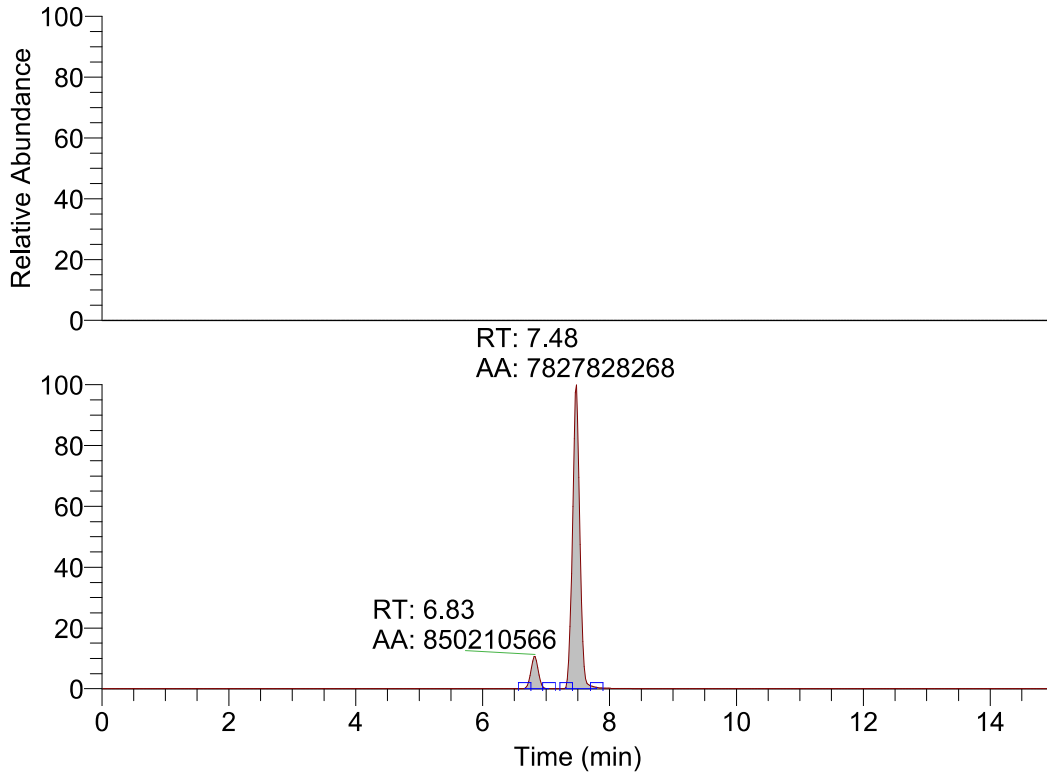

NL: 9.83E8  
m/z=  
377.12412-377.12790 F:  
FTMS + p ESI Full ms  
[80.0000-1000.0000]  
MS Genesis  
993103-13-eb

993103-13-eb #1789 RT: 7.48 AV: 1 NL: 1.94E9  
T: FTMS + p ESI Full ms [80.0000-1000.0000]

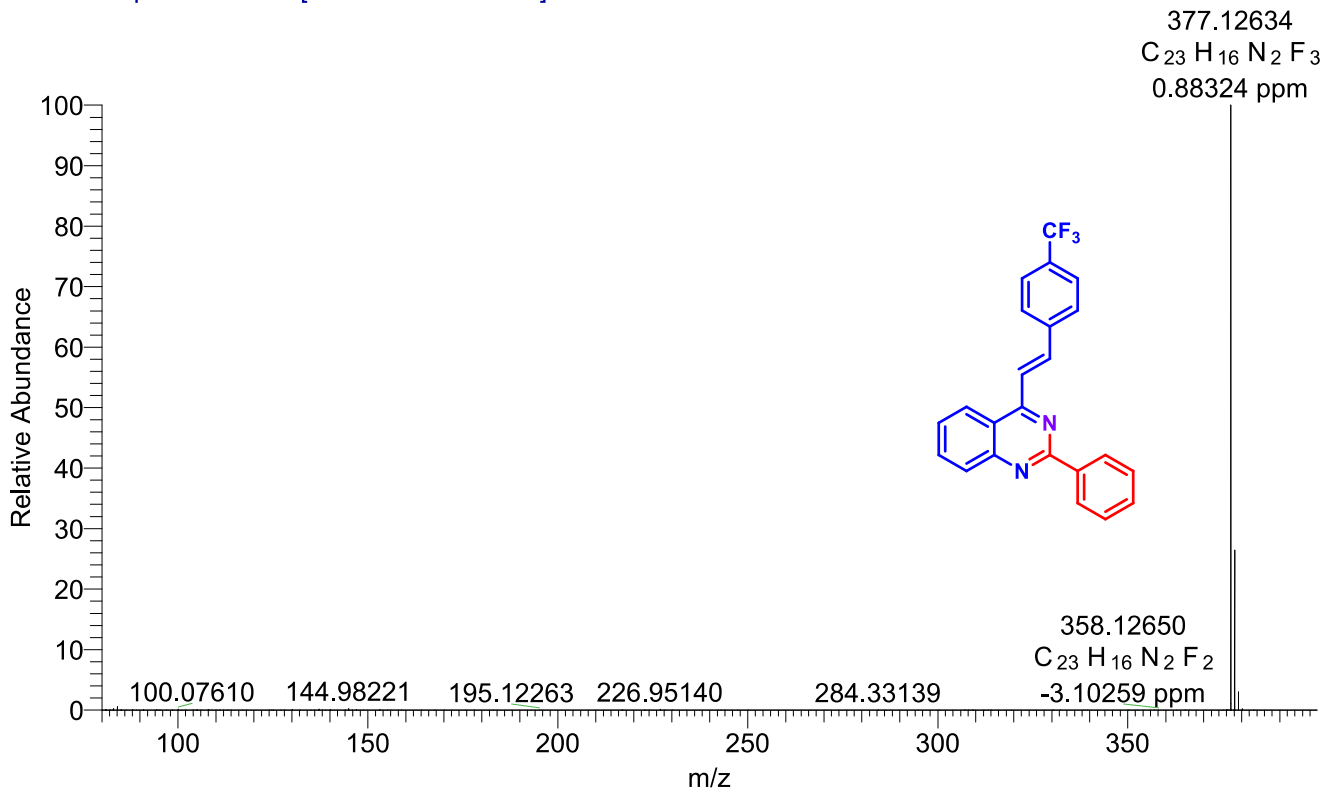

# (E)-4-(2,3-Dichlorostyryl)-2-phenylquinazoline (3k)

## <sup>1</sup>H NMR spectrum of 3k

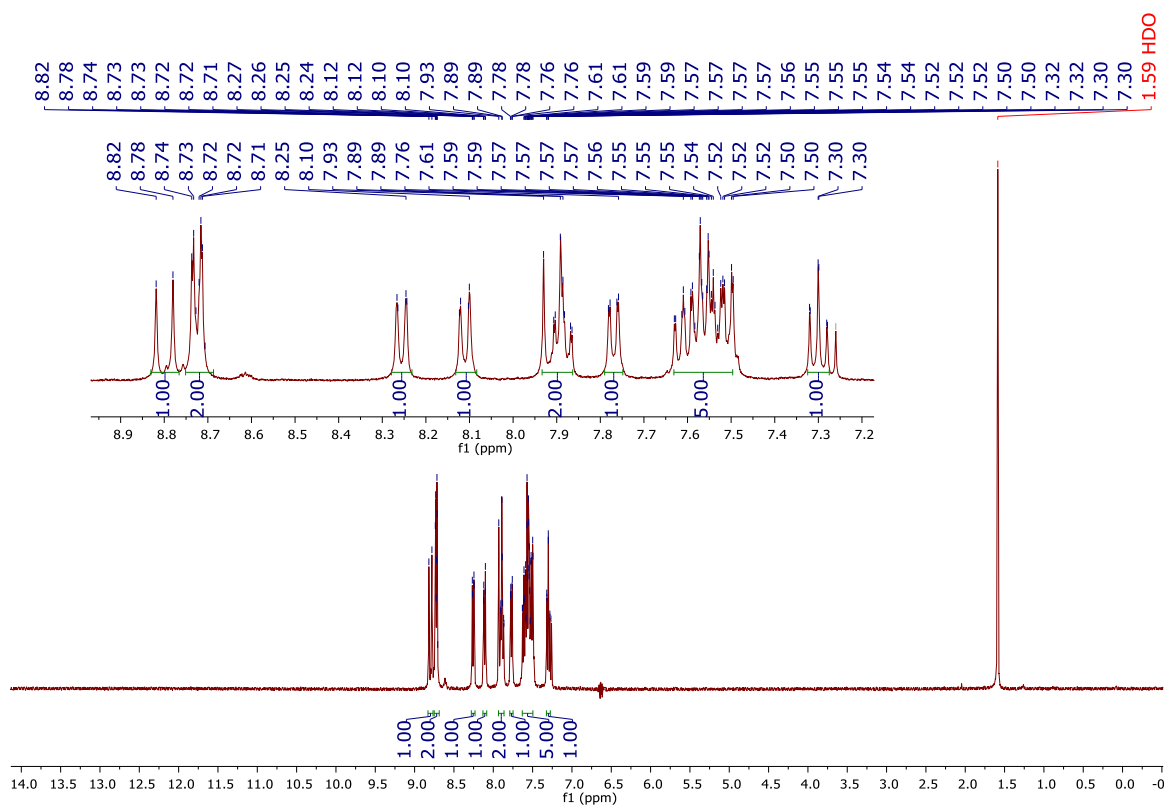

## <sup>13</sup>C NMR spectrum of 3k

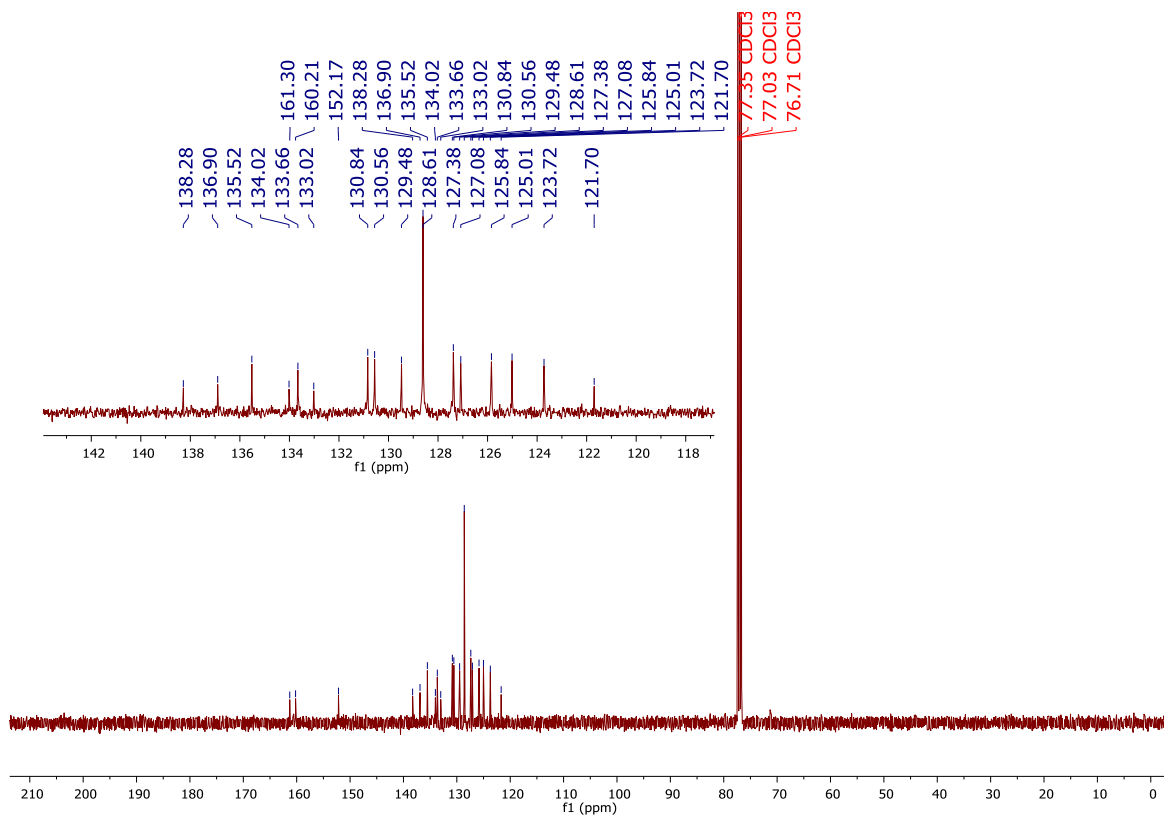



# HRMS spectrum of 3k

993103-06-eb #1974 RT: 8.22 AV: 1 NL: 6.57E8

T: FTMS + p ESI Full ms [80.0000-1000.0000]

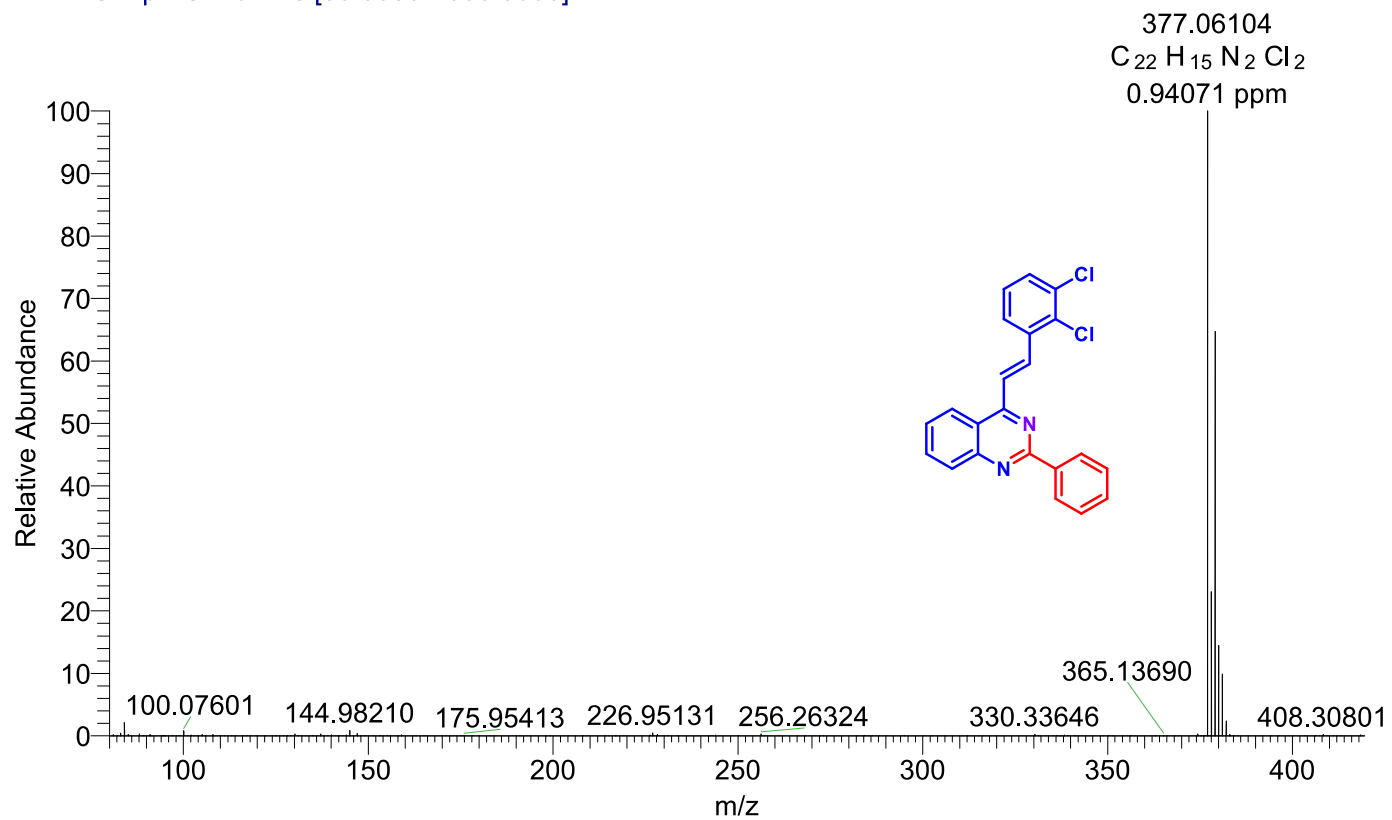

# (E)-4-(2,4-Dichlorostyryl)-2-phenylquinazoline (3I)

## <sup>1</sup>H NMR spectrum of 3I

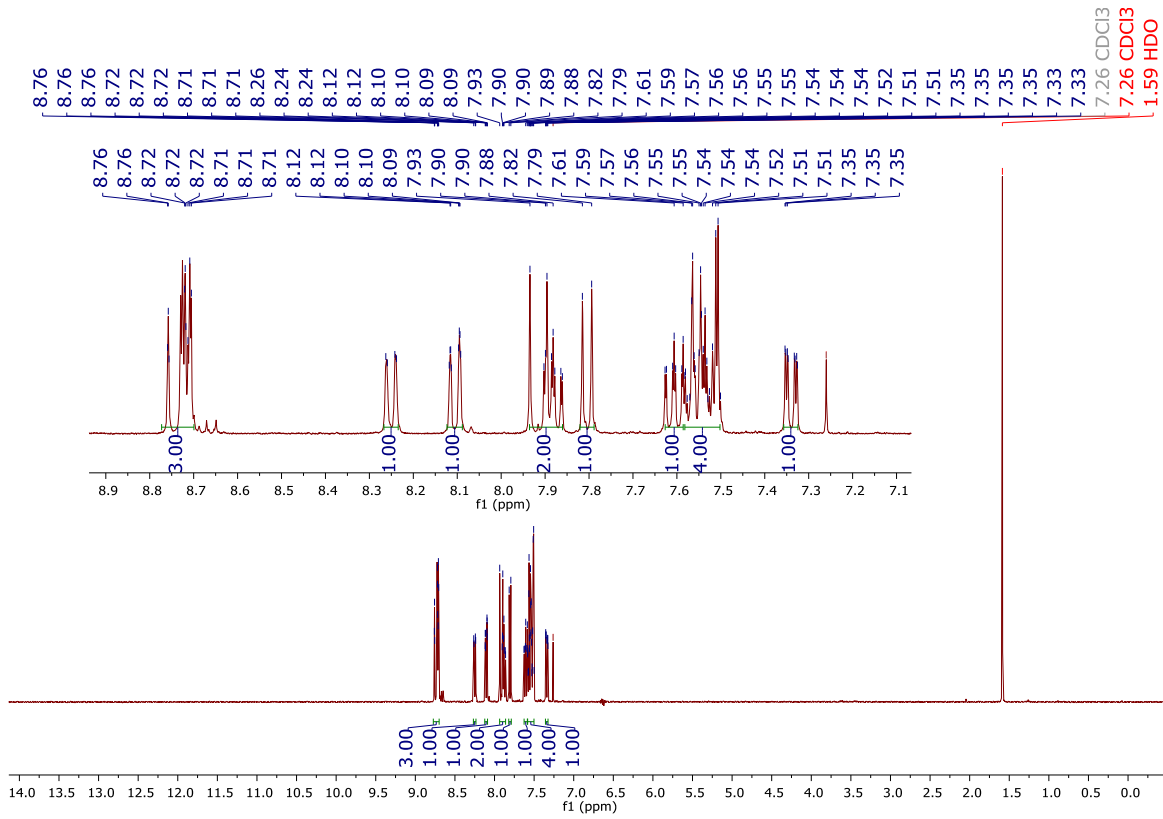

## <sup>13</sup>C NMR spectrum of 3I

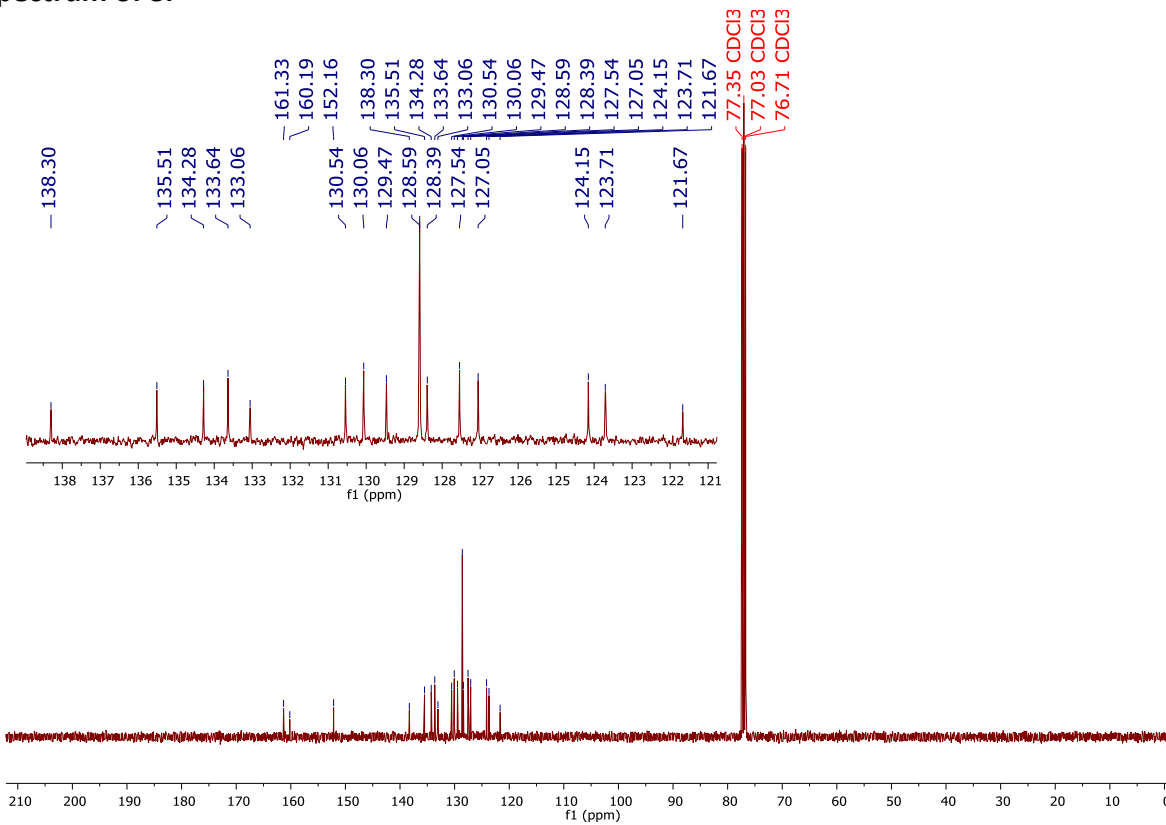

# HRMS spectrum of 3I

993103-07-EB #2004 RT: 8.42 AV: 1 NL: 5.52E8  
T: FTMS + p ESI Full ms [80.0000-1000.0000]

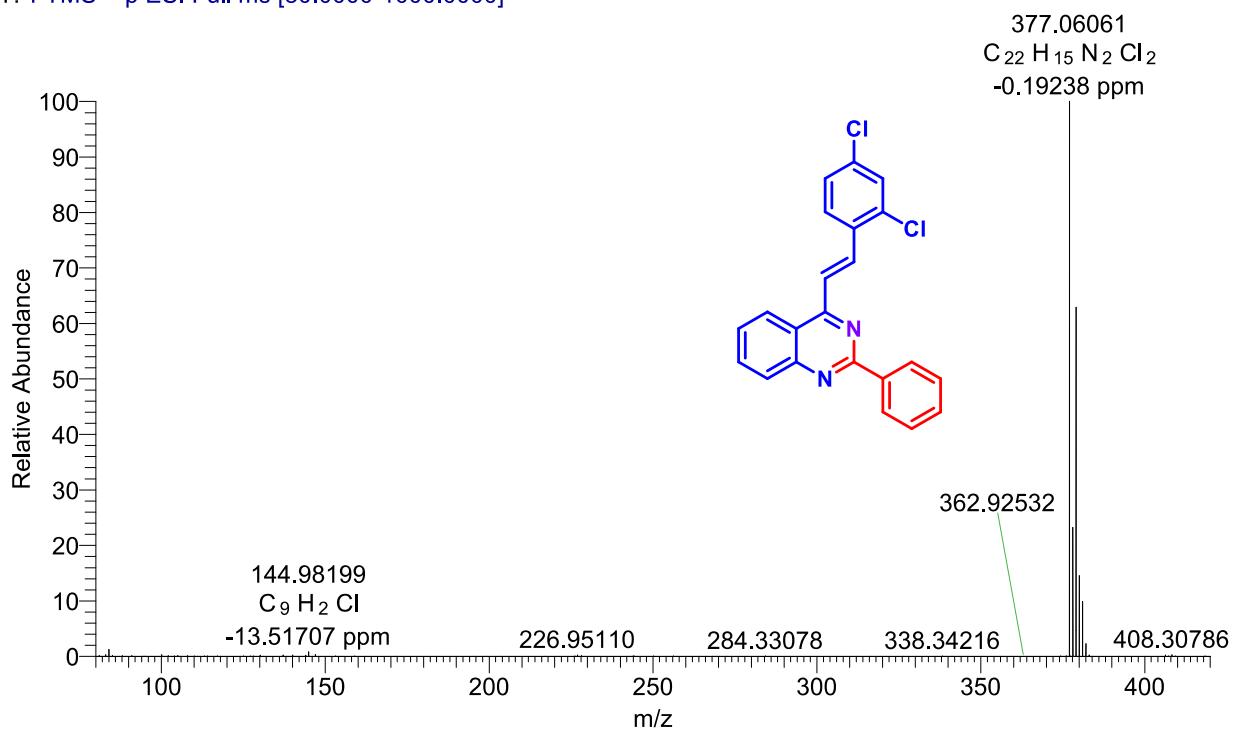

# (E)-4-(3,4-dichlorostyryl)-2-phenylquinazoline (3m)

## <sup>1</sup>H NMR spectrum of 3m

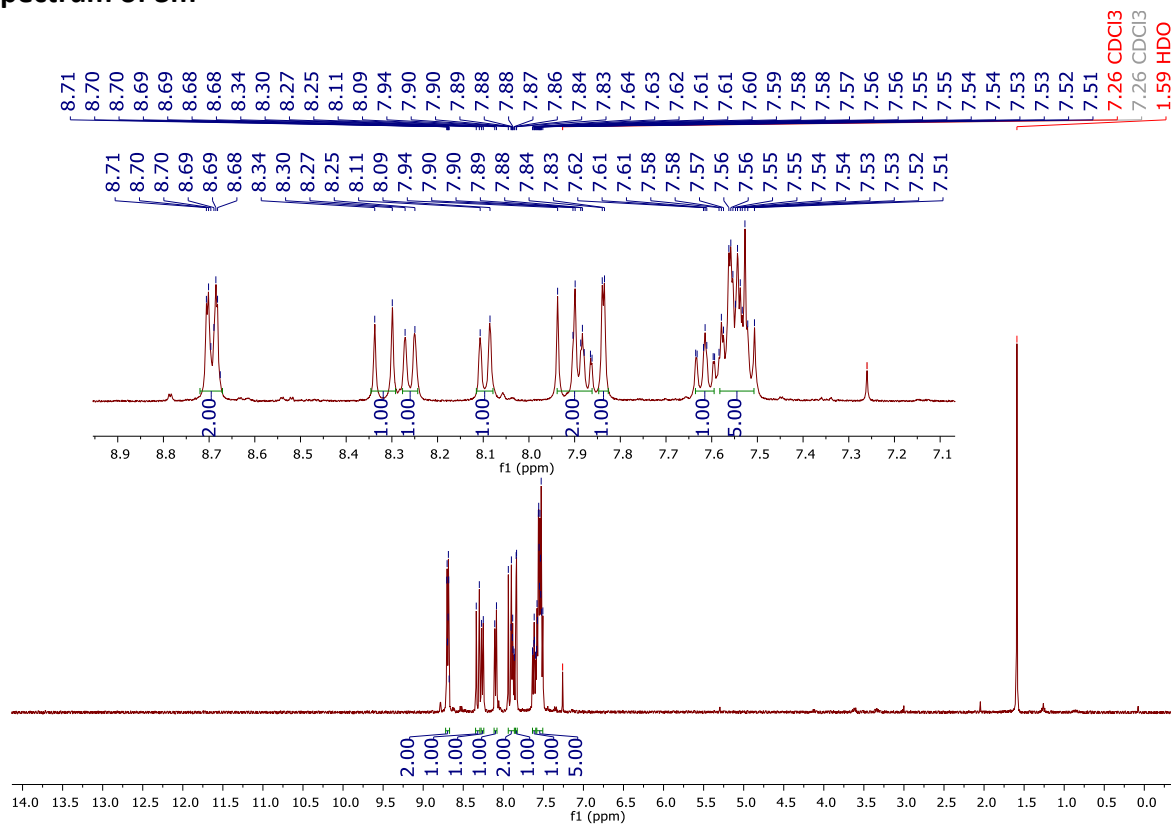

## <sup>13</sup>C NMR spectrum of 3m

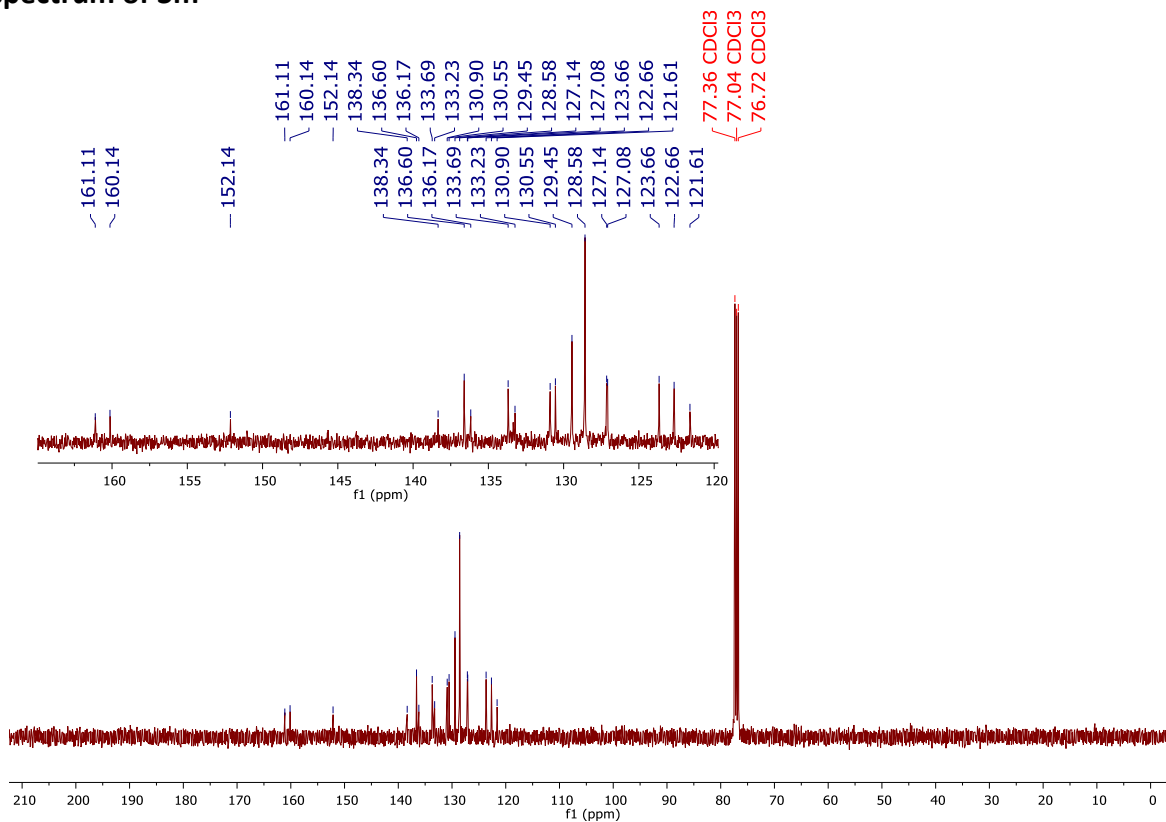

# Chromatogram and HRMS spectrum of 3m

## Compound Chromatograms

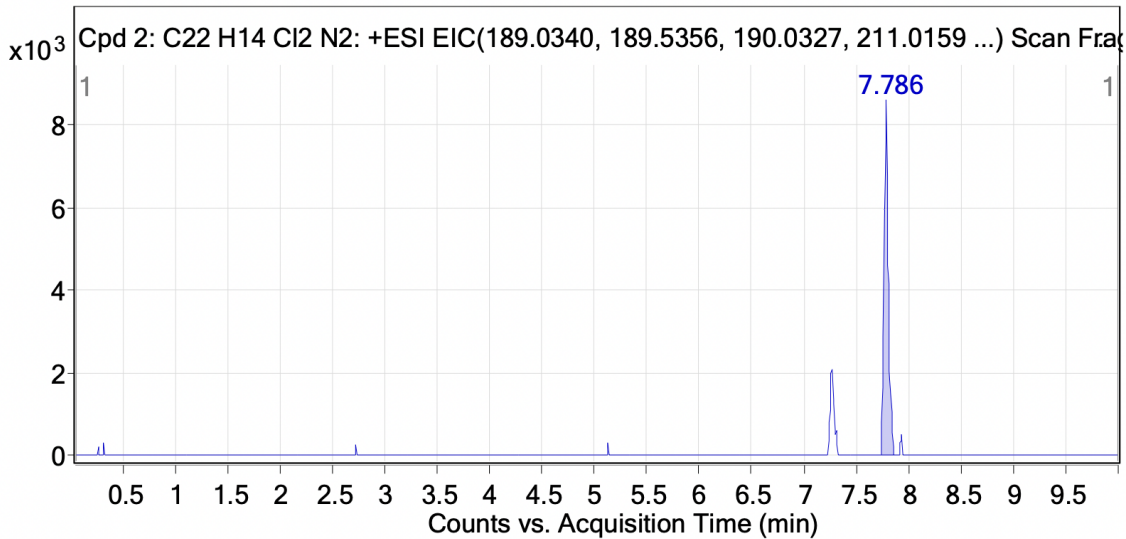

## MS Zoomed Spectrum

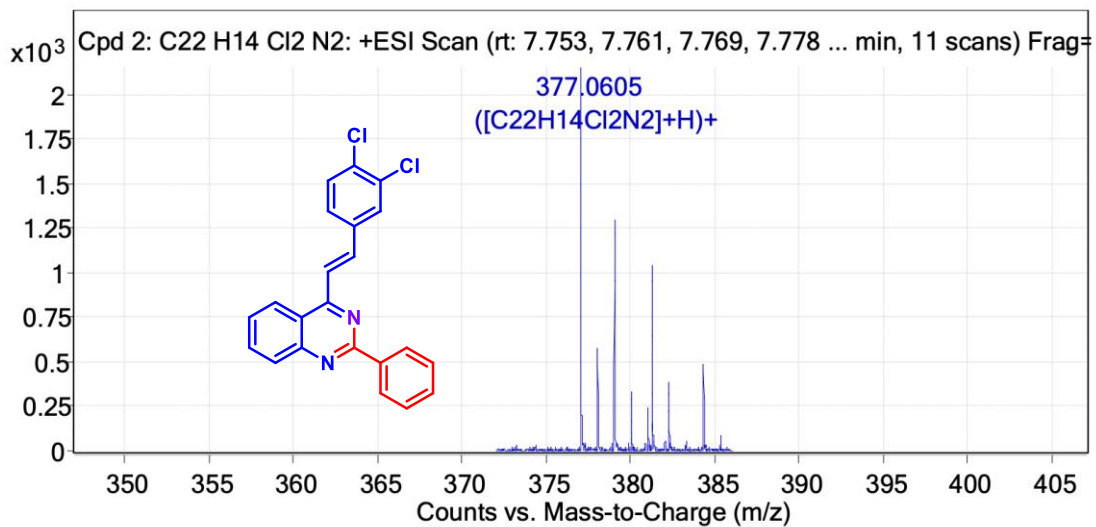

## MS Spectrum Peak List

| m/z      | Calc m/z | Diff(ppm) | z | Abund   | Formula                                                        | Ion                |
|----------|----------|-----------|---|---------|----------------------------------------------------------------|--------------------|
| 377.0605 | 377.0607 | 0.51      | 1 | 2246.73 | C <sub>22</sub> H <sub>14</sub> Cl <sub>2</sub> N <sub>2</sub> | (M+H) <sup>+</sup> |
| 378.0637 | 378.0639 | 0.32      | 1 | 613.93  | C <sub>22</sub> H <sub>14</sub> Cl <sub>2</sub> N <sub>2</sub> | (M+H) <sup>+</sup> |
| 379.0583 | 379.0581 | -0.46     | 1 | 1376.51 | C <sub>22</sub> H <sub>14</sub> Cl <sub>2</sub> N <sub>2</sub> | (M+H) <sup>+</sup> |
| 380.0607 | 380.061  | 0.79      | 1 | 357.97  | C <sub>22</sub> H <sub>14</sub> Cl <sub>2</sub> N <sub>2</sub> | (M+H) <sup>+</sup> |
| 381.0579 | 381.0562 | -4.34     | 1 | 229.4   | C <sub>22</sub> H <sub>14</sub> Cl <sub>2</sub> N <sub>2</sub> | (M+H) <sup>+</sup> |

--- End Of Report ---



# Chromatogram and HRMS spectrum of 3n

c:\xcalibur\...1221101ag\993103-08-eb

11/01/22 23:20:22

RT: 0.00 - 15.01 SM: 13G

NL: 3.97E8  
m/z=  
377.05879-377.06257 F:  
FTMS + p ESI Full ms  
[80.0000-1000.0000]  
MS ste8

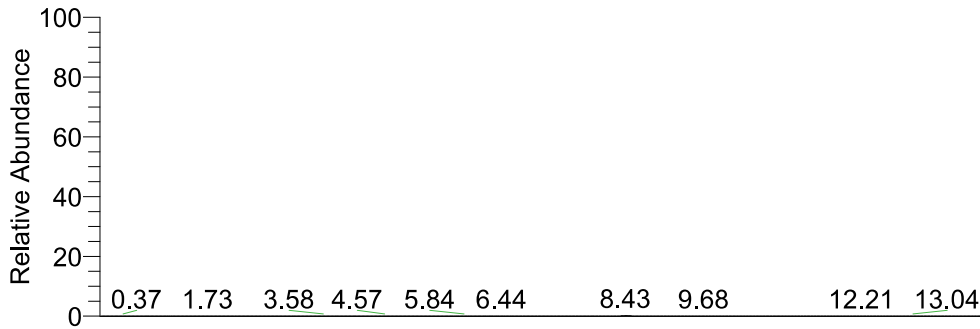

NL: 5.00E8  
m/z=  
377.05879-377.06257 F:  
FTMS + p ESI Full ms  
[80.0000-1000.0000]  
MS Genesis  
993103-08-eb

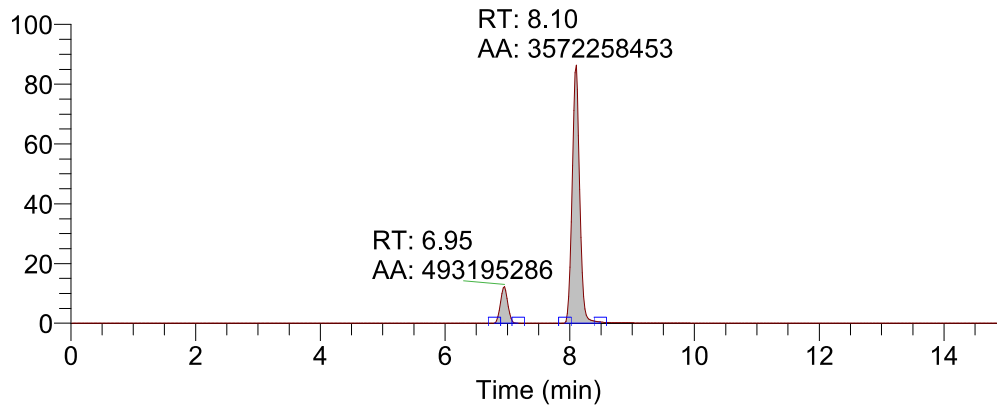

993103-08-eb #1924 RT: 8.08 AV: 1 NL: 1.04E9  
T: FTMS + p ESI Full lock ms [80.0000-1000.0000]

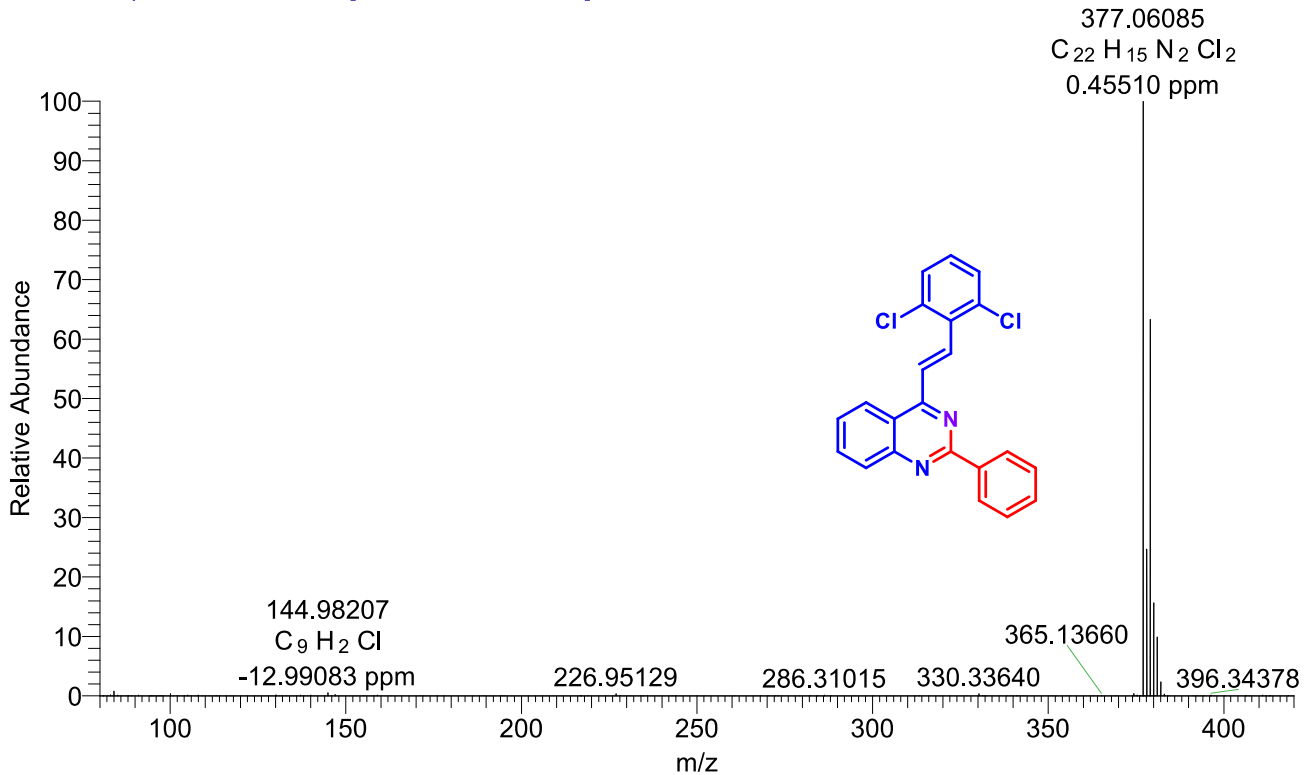





# HRMS spectrum of 3o

993103-14-eb #1949 RT: 8.15 AV: 1 NL: 9.93E7  
T: FTMS + p ESI Full lock ms [80.0000-1000.0000]

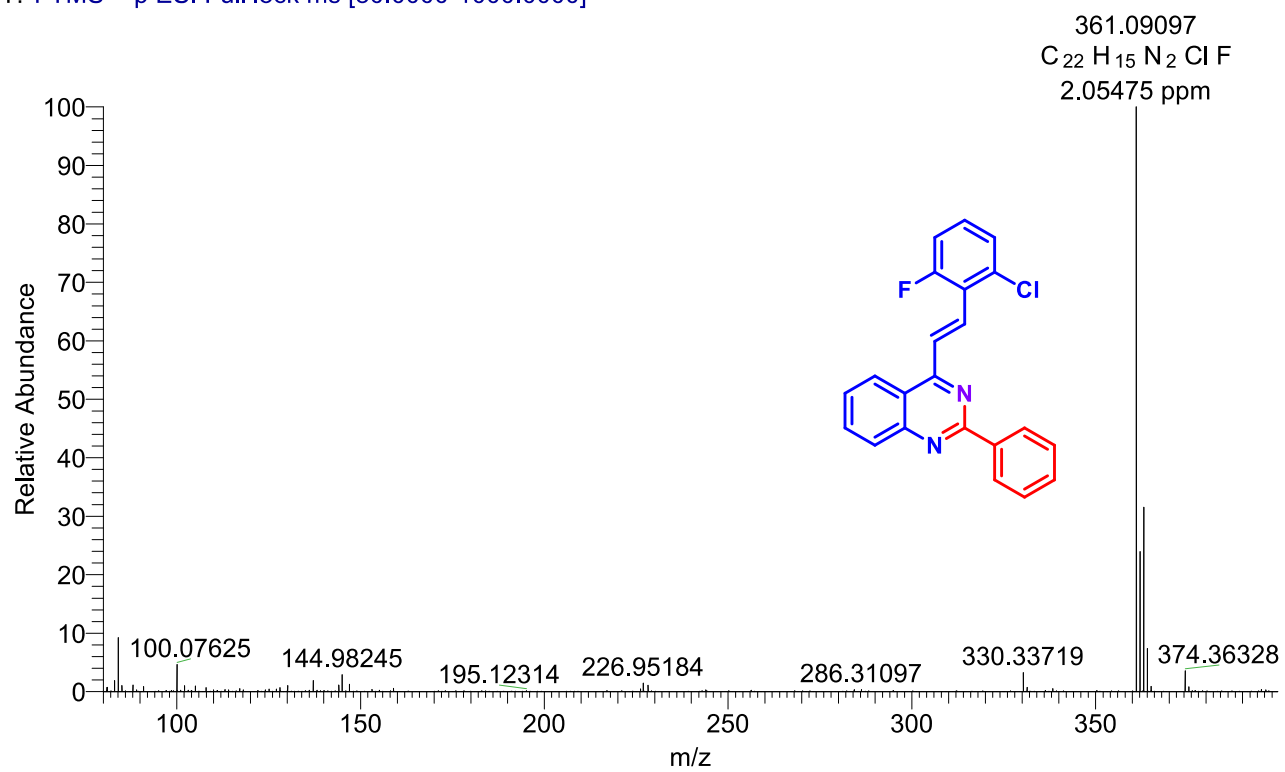

# (E)-4-(Styryl)quinazoline (5a)

## <sup>1</sup>H NMR spectrum of 5a

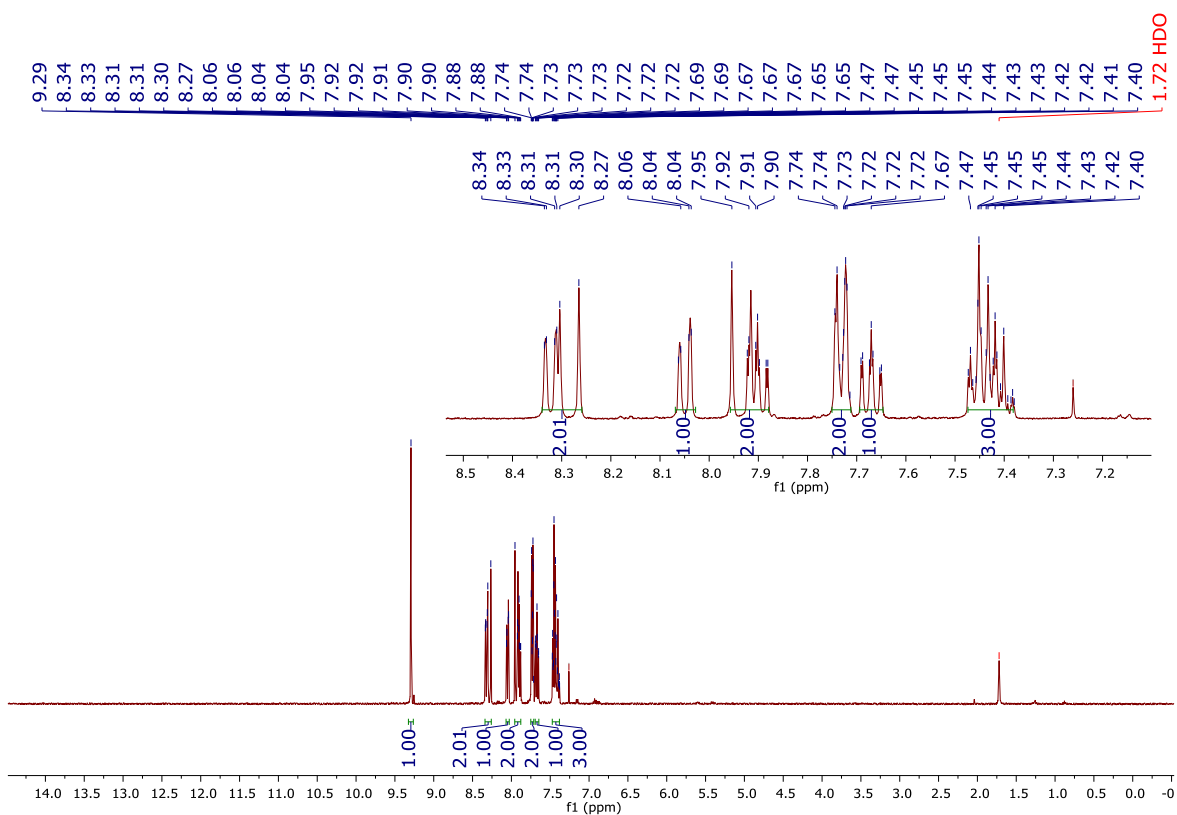

## <sup>13</sup>C NMR spectrum of 5a

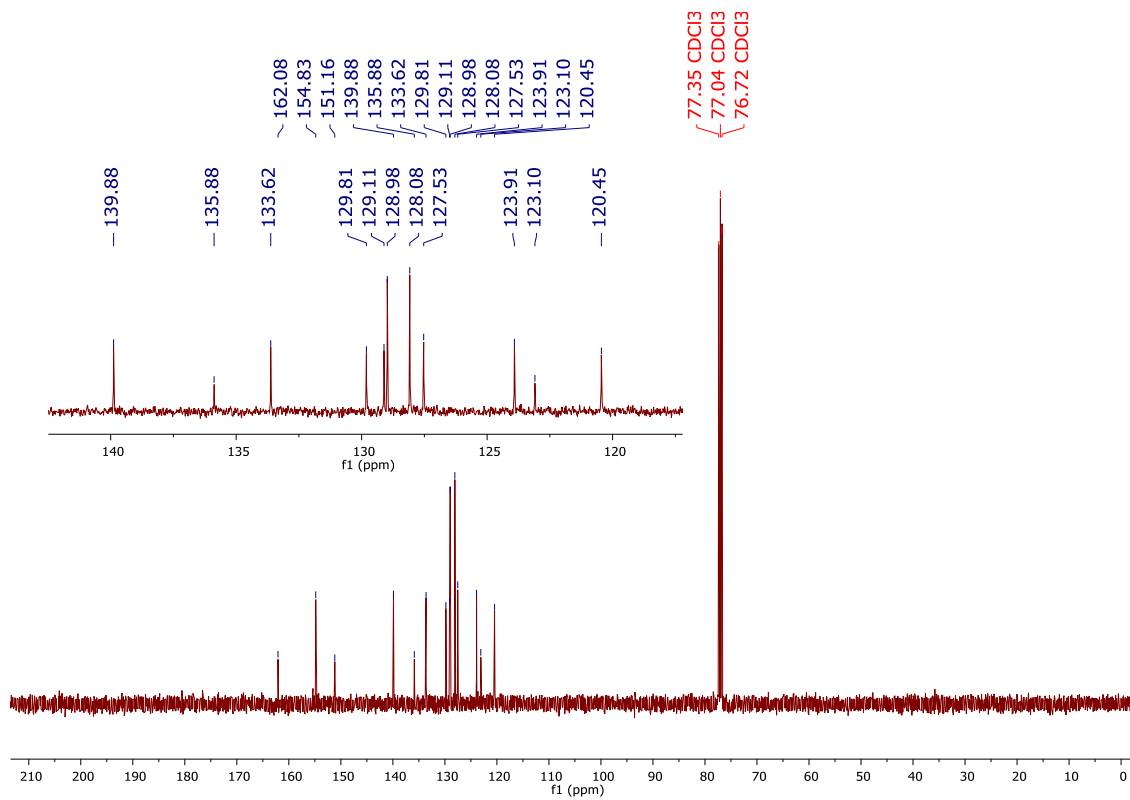

# HRMS spectrum of 5a

MS Zoomed Spectrum

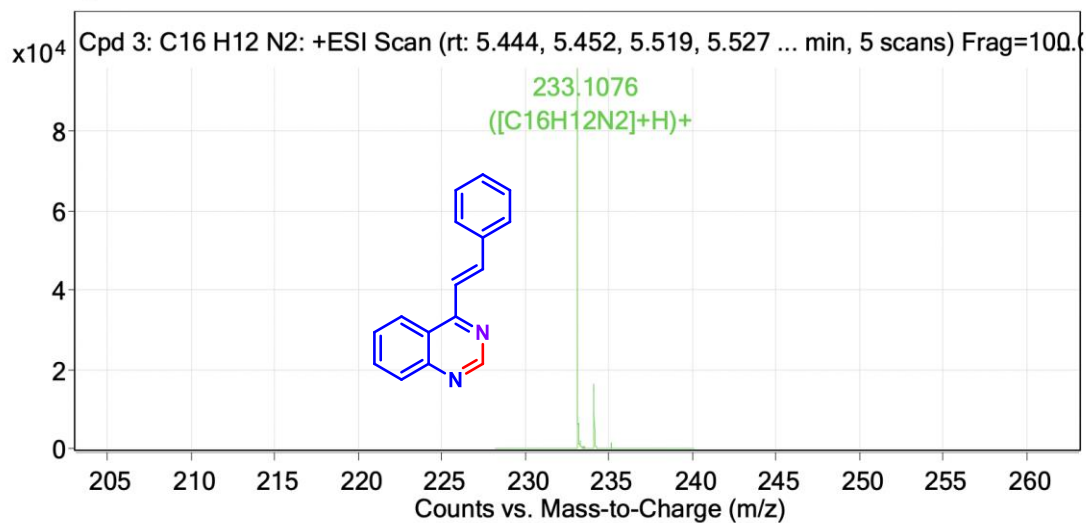

## MS Spectrum Peak List

| m/z      | Calc m/z | Diff(ppm) | z | Abund    | Formula                                        | Ion                |
|----------|----------|-----------|---|----------|------------------------------------------------|--------------------|
| 233.1076 | 233.1073 | -1.2      | 1 | 99314.86 | C <sub>16</sub> H <sub>12</sub> N <sub>2</sub> | (M+H) <sup>+</sup> |
| 234.1107 | 234.1104 | -1.17     | 1 | 16623.69 | C <sub>16</sub> H <sub>12</sub> N <sub>2</sub> | (M+H) <sup>+</sup> |
| 235.1143 | 235.1136 | -3.16     | 1 | 1609.85  | C <sub>16</sub> H <sub>12</sub> N <sub>2</sub> | (M+H) <sup>+</sup> |

--- End Of Report ---

# (E)-4-(4-Methoxystyryl)quinazoline (5b)

## <sup>1</sup>H NMR spectrum of 5b

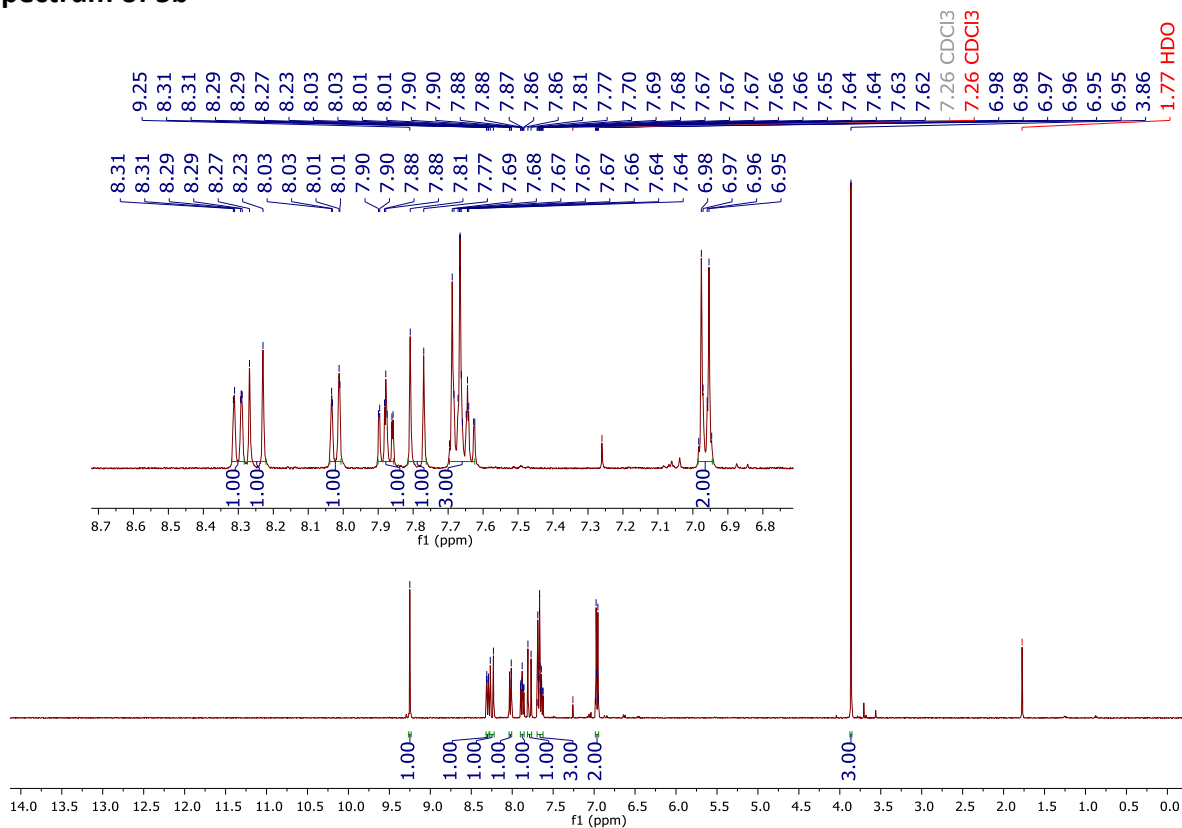

## <sup>13</sup>C NMR spectrum of 5b

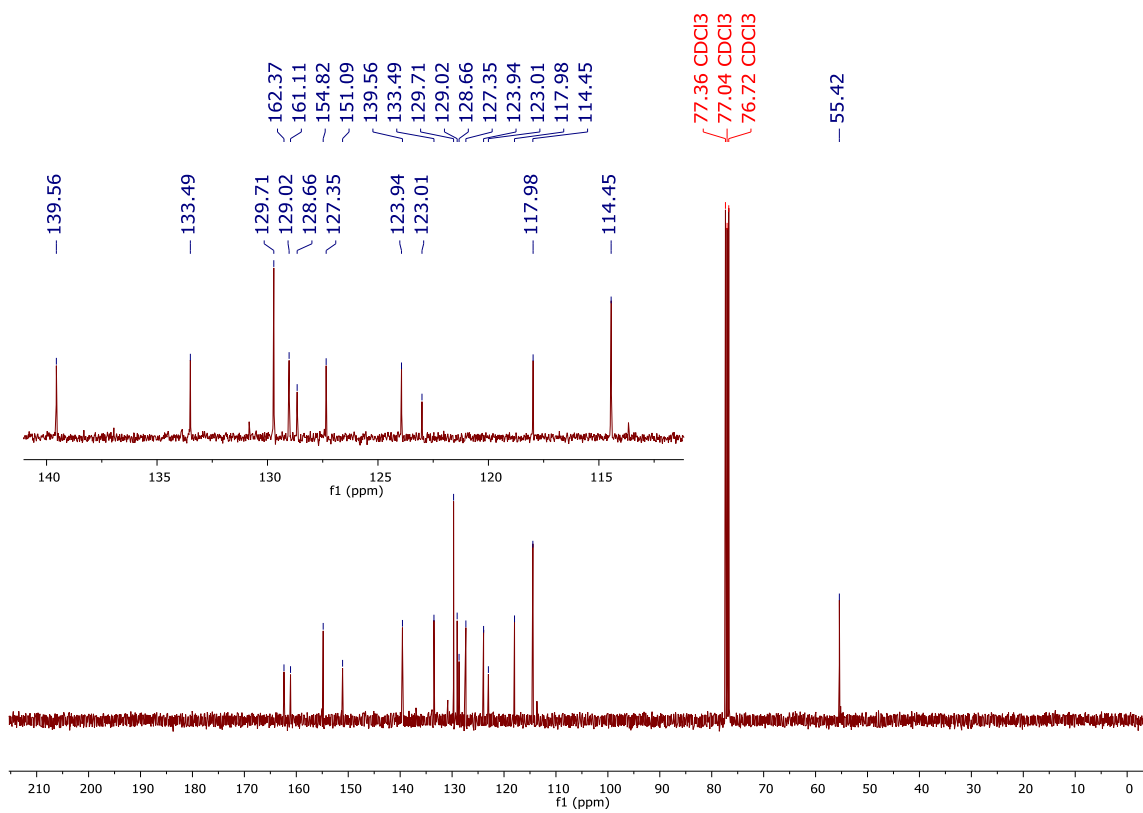

# HRMS spectrum of 5b

MS Zoomed Spectrum

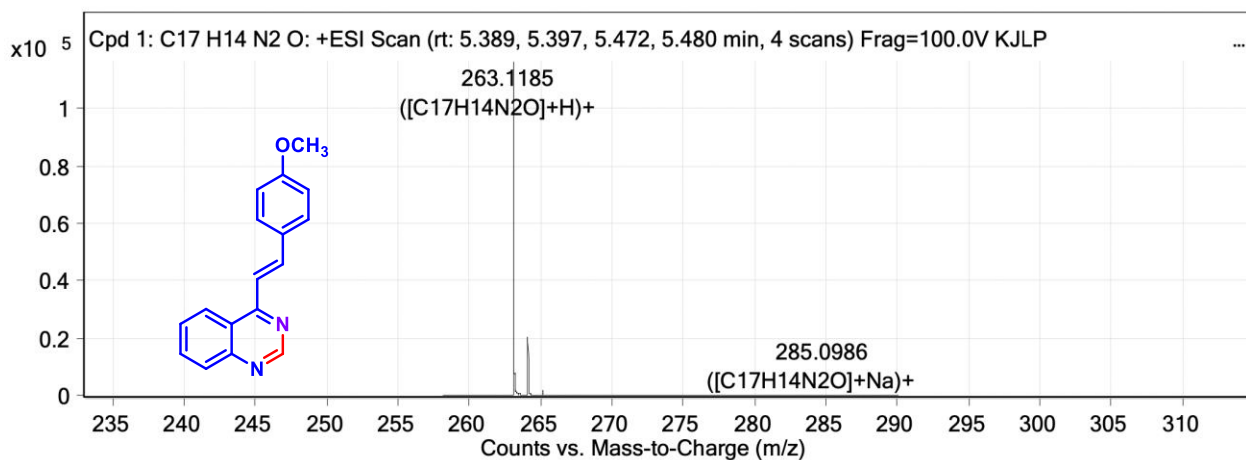

## MS Spectrum Peak List

| m/z      | Calc m/z | Diff(ppm) | z | Abund     | Formula                                          | Ion                 |
|----------|----------|-----------|---|-----------|--------------------------------------------------|---------------------|
| 263.1185 | 263.1179 | -2.23     | 1 | 116581.25 | C <sub>17</sub> H <sub>14</sub> N <sub>2</sub> O | (M+H) <sup>+</sup>  |
| 264.1215 | 264.121  | -1.8      | 1 | 21084.46  | C <sub>17</sub> H <sub>14</sub> N <sub>2</sub> O | (M+H) <sup>+</sup>  |
| 265.1246 | 265.124  | -2.43     | 1 | 2069.32   | C <sub>17</sub> H <sub>14</sub> N <sub>2</sub> O | (M+H) <sup>+</sup>  |
| 285.0986 | 285.0998 | 4.5       | 1 | 63.75     | C <sub>17</sub> H <sub>14</sub> N <sub>2</sub> O | (M+Na) <sup>+</sup> |

--- End Of Report ---



# HRMS spectrum of 3c

MS Zoomed Spectrum

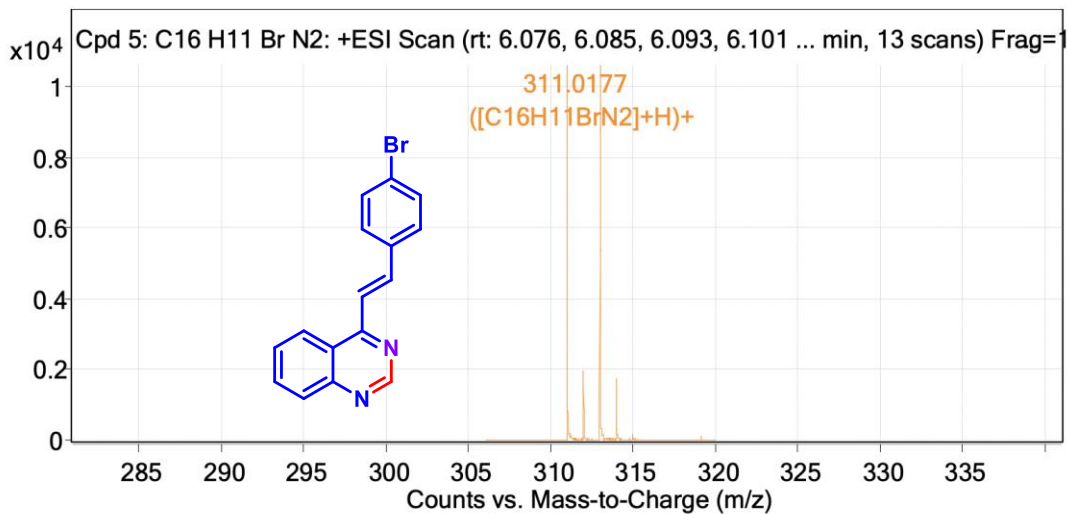

## MS Spectrum Peak List

| m/z      | Calc m/z | Diff(ppm) | z | Abund    | Formula                                          | Ion                |
|----------|----------|-----------|---|----------|--------------------------------------------------|--------------------|
| 311.0177 | 311.0178 | 0.51      | 1 | 10909.16 | C <sub>16</sub> H <sub>11</sub> BrN <sub>2</sub> | (M+H) <sup>+</sup> |
| 312.0204 | 312.021  | 1.76      | 1 | 2062.76  | C <sub>16</sub> H <sub>11</sub> BrN <sub>2</sub> | (M+H) <sup>+</sup> |
| 313.0157 | 313.0159 | 0.55      | 1 | 10670.34 | C <sub>16</sub> H <sub>11</sub> BrN <sub>2</sub> | (M+H) <sup>+</sup> |
| 314.0189 | 314.019  | 0.13      | 1 | 1836.99  | C <sub>16</sub> H <sub>11</sub> BrN <sub>2</sub> | (M+H) <sup>+</sup> |
| 315.0214 | 315.022  | 2.14      | 1 | 126.85   | C <sub>16</sub> H <sub>11</sub> BrN <sub>2</sub> | (M+H) <sup>+</sup> |

--- End Of Report ---





# HRMS spectrum of 5d

MS Zoomed Spectrum

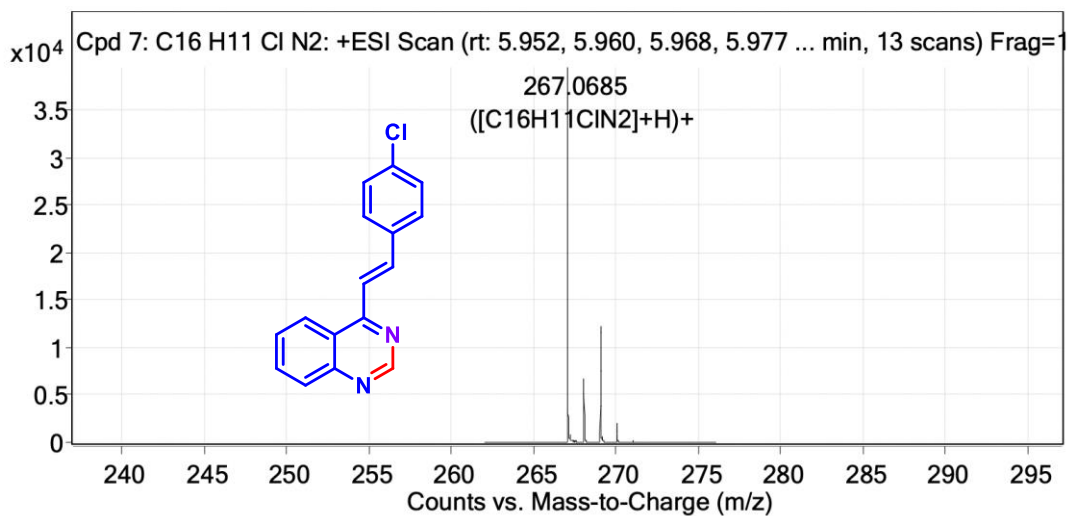

## MS Spectrum Peak List

| m/z      | Calc m/z | Diff(ppm) | z | Abund    | Formula                                          | Ion                |
|----------|----------|-----------|---|----------|--------------------------------------------------|--------------------|
| 267.0685 | 267.0684 | -0.49     | 1 | 39671.45 | C <sub>16</sub> H <sub>11</sub> ClN <sub>2</sub> | (M+H) <sup>+</sup> |
| 268.0718 | 268.0715 | -1.37     | 1 | 6808.85  | C <sub>16</sub> H <sub>11</sub> ClN <sub>2</sub> | (M+H) <sup>+</sup> |
| 269.0659 | 269.0658 | -0.22     | 1 | 12614.09 | C <sub>16</sub> H <sub>11</sub> ClN <sub>2</sub> | (M+H) <sup>+</sup> |
| 270.0683 | 270.0687 | 1.31      | 1 | 2187.28  | C <sub>16</sub> H <sub>11</sub> ClN <sub>2</sub> | (M+H) <sup>+</sup> |
| 271.0738 | 271.0717 | -7.87     | 1 | 155.37   | C <sub>16</sub> H <sub>11</sub> ClN <sub>2</sub> | (M+H) <sup>+</sup> |

--- End Of Report ---

# (E)-4-(4-Fluorostyryl)quinazoline (5e)

## <sup>1</sup>H NMR spectrum of 5e

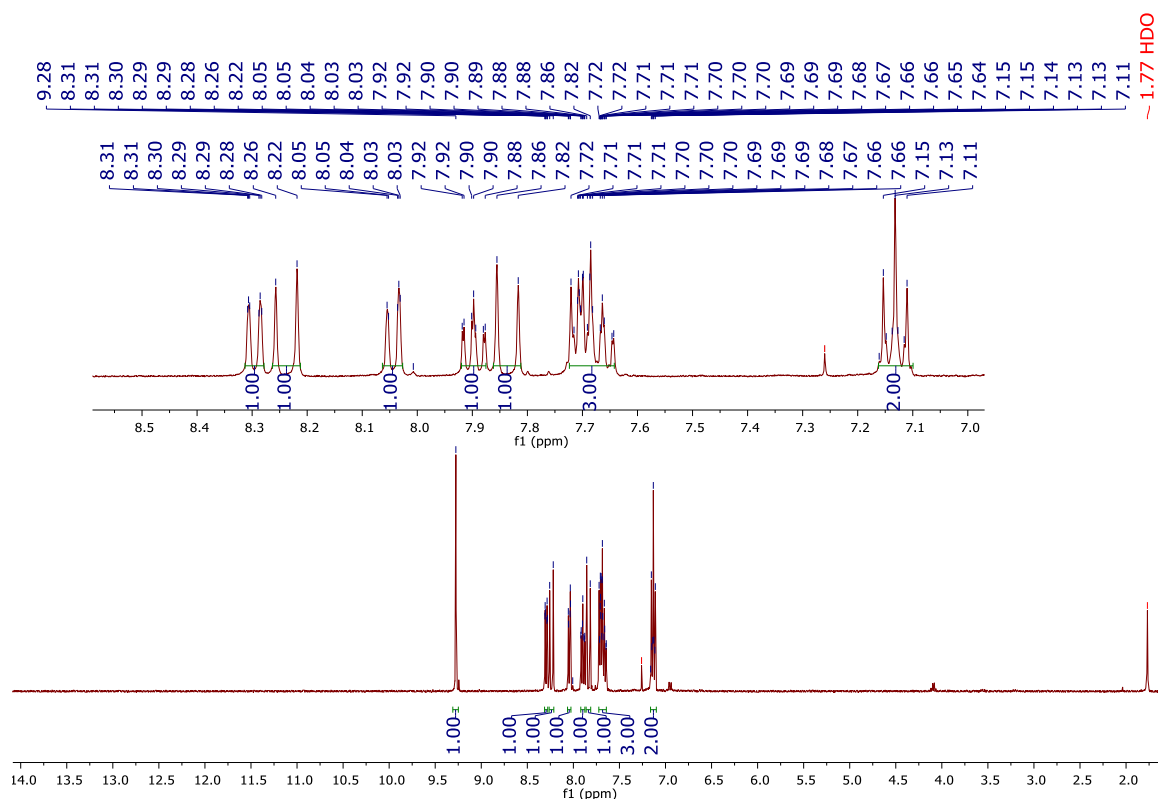

## <sup>13</sup>C NMR spectrum of 5e

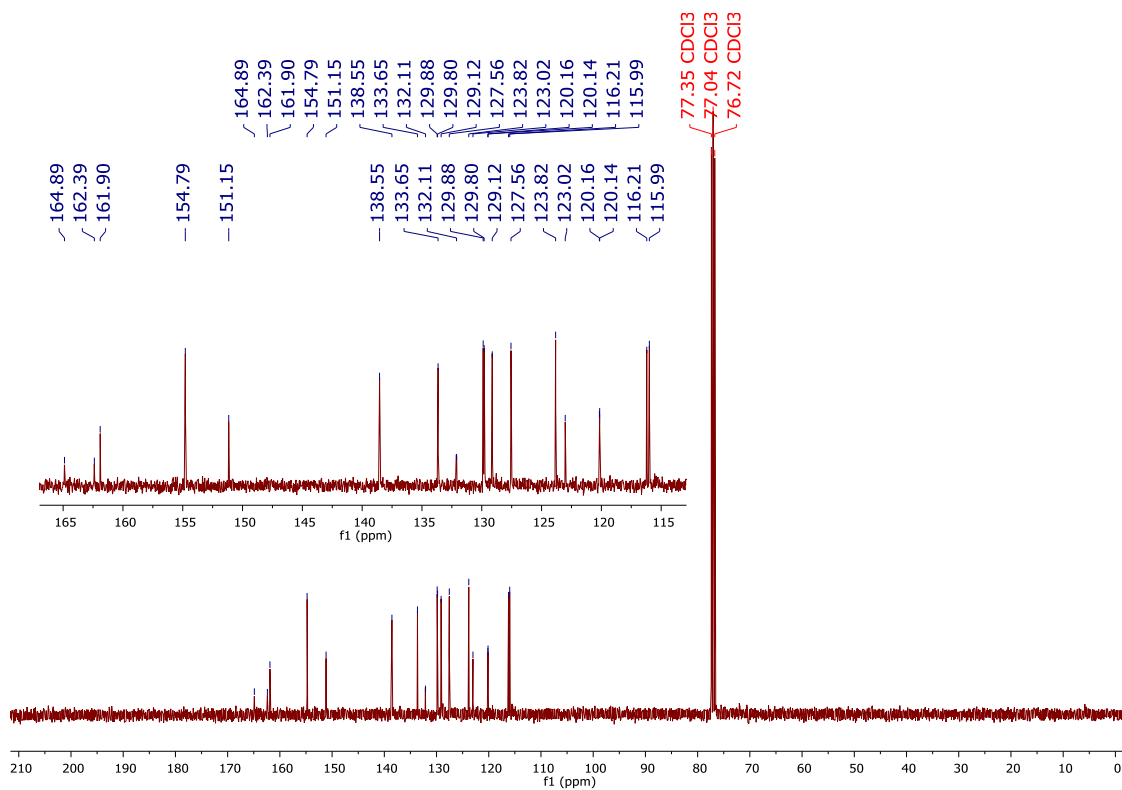

# HRMS spectrum of 5e

MS Zoomed Spectrum

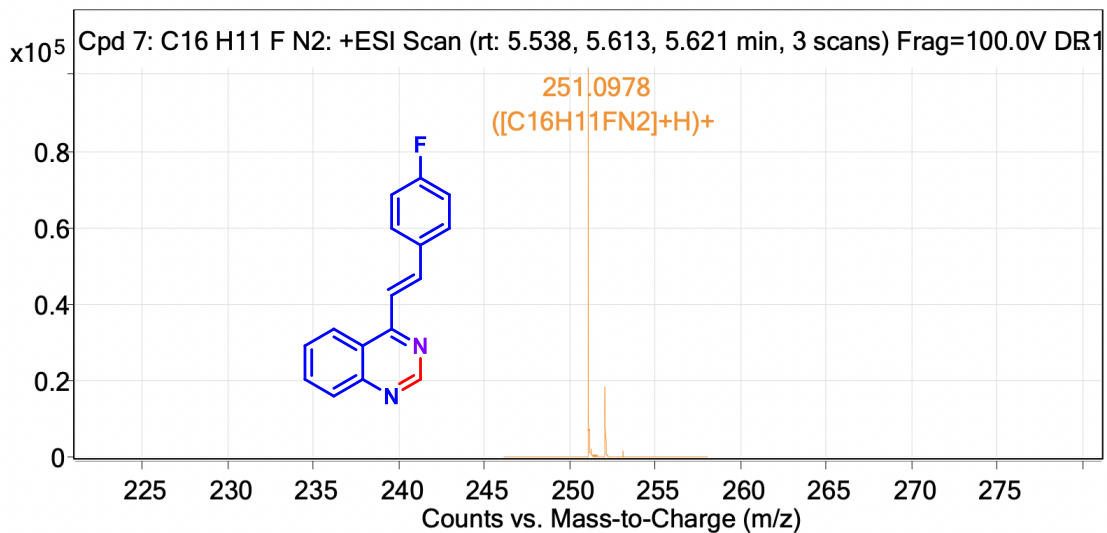

## MS Spectrum Peak List

| m/z      | Calc m/z | Diff(ppm) | z | Abund    | Formula                                         | Ion                |
|----------|----------|-----------|---|----------|-------------------------------------------------|--------------------|
| 251.0978 | 251.0979 | 0.51      | 1 | 106000.8 | C <sub>16</sub> H <sub>11</sub> FN <sub>2</sub> | (M+H) <sup>+</sup> |
| 252.1009 | 252.101  | 0.64      | 1 | 18572.72 | C <sub>16</sub> H <sub>11</sub> FN <sub>2</sub> | (M+H) <sup>+</sup> |
| 253.1053 | 253.1041 | -4.73     | 1 | 1742.95  | C <sub>16</sub> H <sub>11</sub> FN <sub>2</sub> | (M+H) <sup>+</sup> |

--- End Of Report ---

# (E)-4-(4-(Trifluoromethyl)styryl)quinazoline (5f)

## <sup>1</sup>H NMR spectrum of 5f

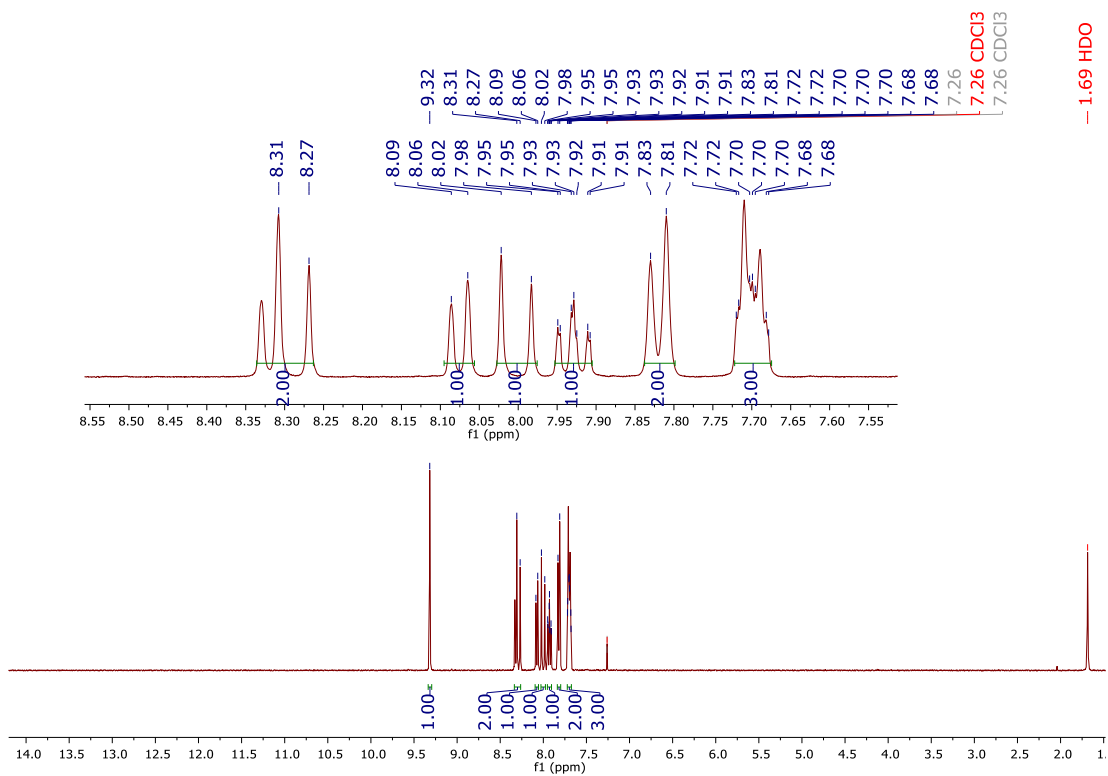

## <sup>13</sup>C NMR spectrum of 5f

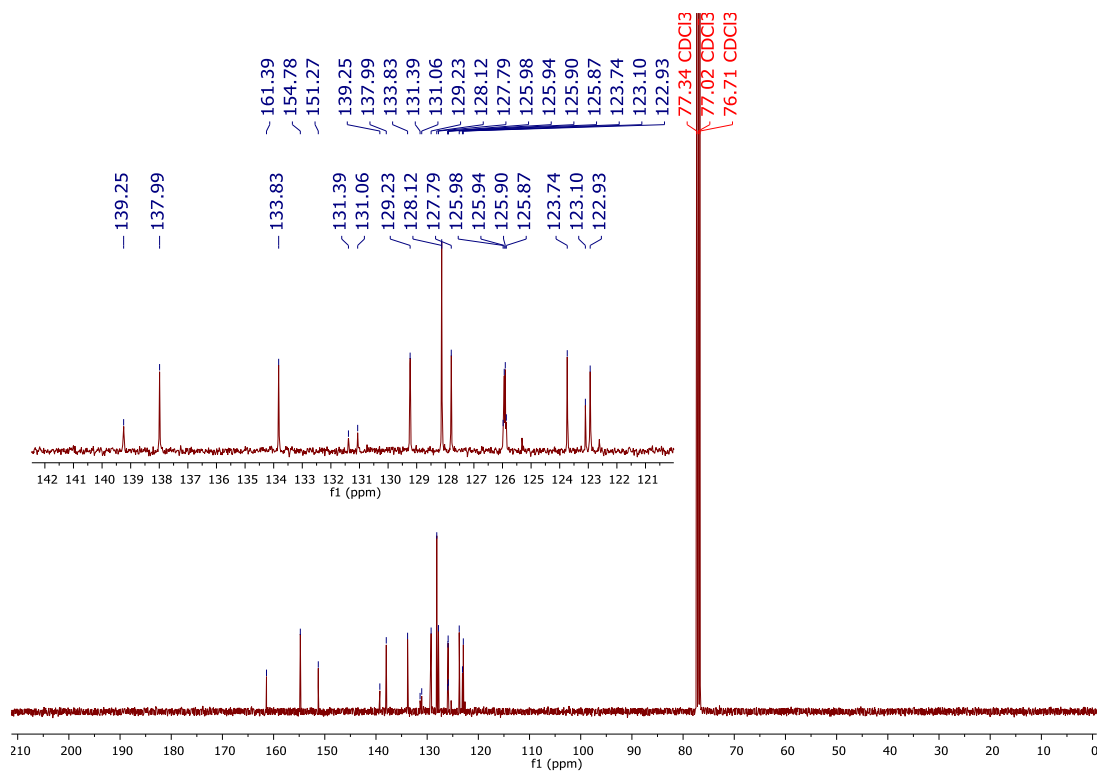

# HRMS spectrum of 5f

MS Zoomed Spectrum

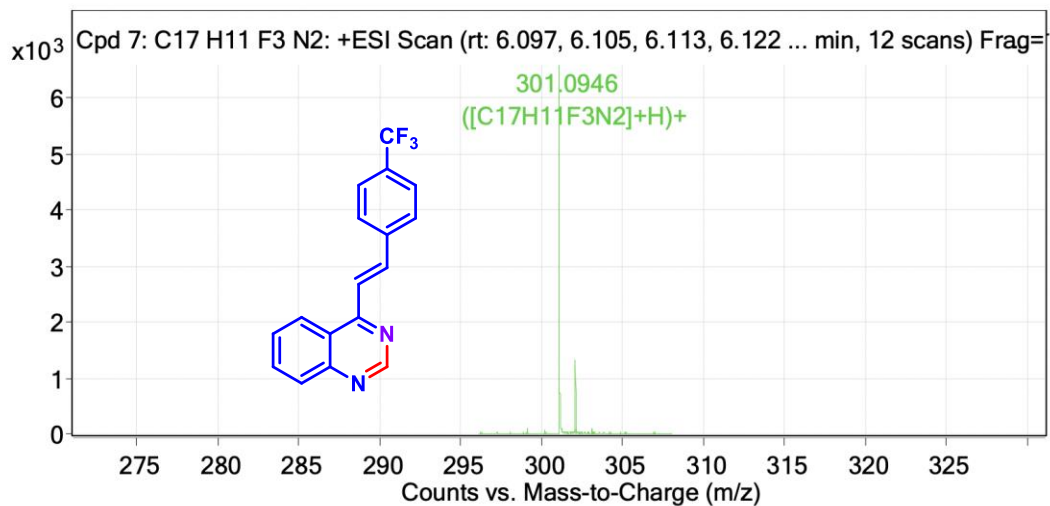

## MS Spectrum Peak List

| m/z      | Calc m/z | Diff(ppm) | z | Abund   | Formula                                                       | Ion                |
|----------|----------|-----------|---|---------|---------------------------------------------------------------|--------------------|
| 301.0946 | 301.0947 | 0.32      | 1 | 6880.04 | C <sub>17</sub> H <sub>11</sub> F <sub>3</sub> N <sub>2</sub> | (M+H) <sup>+</sup> |
| 302.0981 | 302.0978 | -0.69     | 1 | 1419.71 | C <sub>17</sub> H <sub>11</sub> F <sub>3</sub> N <sub>2</sub> | (M+H) <sup>+</sup> |
| 303.1053 | 303.101  | -14.22    | 1 | 70.38   | C <sub>17</sub> H <sub>11</sub> F <sub>3</sub> N <sub>2</sub> | (M+H) <sup>+</sup> |

--- End Of Report ---



# HRMS spectrum of 5g

MS Zoomed Spectrum

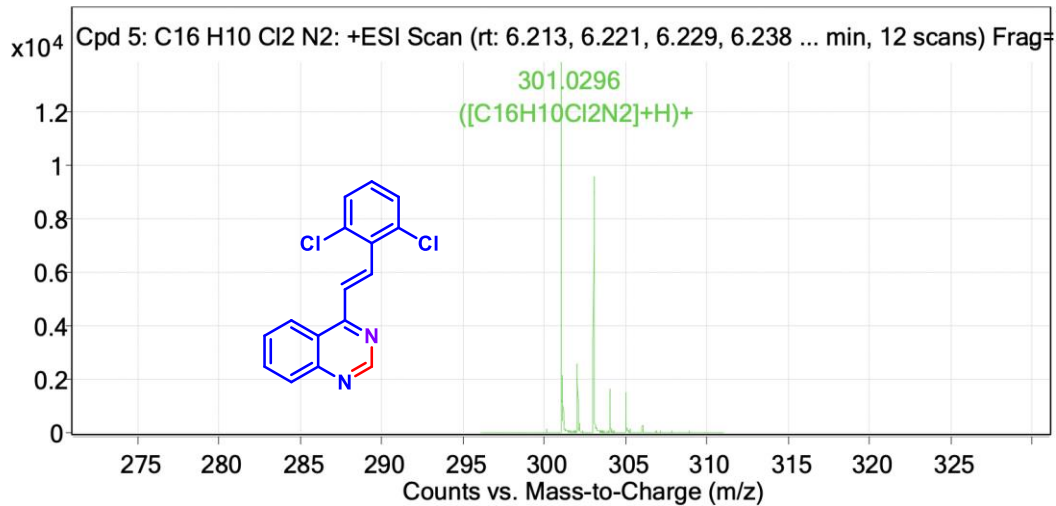

## MS Spectrum Peak List

| m/z      | Calc m/z | Diff(ppm) | z | Abund    | Formula                                                        | Ion                |
|----------|----------|-----------|---|----------|----------------------------------------------------------------|--------------------|
| 301.0296 | 301.0294 | -0.9      | 1 | 14337.67 | C <sub>16</sub> H <sub>10</sub> Cl <sub>2</sub> N <sub>2</sub> | (M+H) <sup>+</sup> |
| 302.0319 | 302.0325 | 2.04      | 1 | 2640.04  | C <sub>16</sub> H <sub>10</sub> Cl <sub>2</sub> N <sub>2</sub> | (M+H) <sup>+</sup> |
| 303.0267 | 303.0266 | -0.25     | 1 | 9794.85  | C <sub>16</sub> H <sub>10</sub> Cl <sub>2</sub> N <sub>2</sub> | (M+H) <sup>+</sup> |
| 304.03   | 304.0296 | -1.33     | 1 | 1674     | C <sub>16</sub> H <sub>10</sub> Cl <sub>2</sub> N <sub>2</sub> | (M+H) <sup>+</sup> |
| 305.0245 | 305.0243 | -0.6      | 1 | 1580.69  | C <sub>16</sub> H <sub>10</sub> Cl <sub>2</sub> N <sub>2</sub> | (M+H) <sup>+</sup> |
| 306.0279 | 306.0269 | -3.43     | 1 | 289.01   | C <sub>16</sub> H <sub>10</sub> Cl <sub>2</sub> N <sub>2</sub> | (M+H) <sup>+</sup> |

--- End Of Report ---





# HRMS spectrum of 5h

MS Zoomed Spectrum

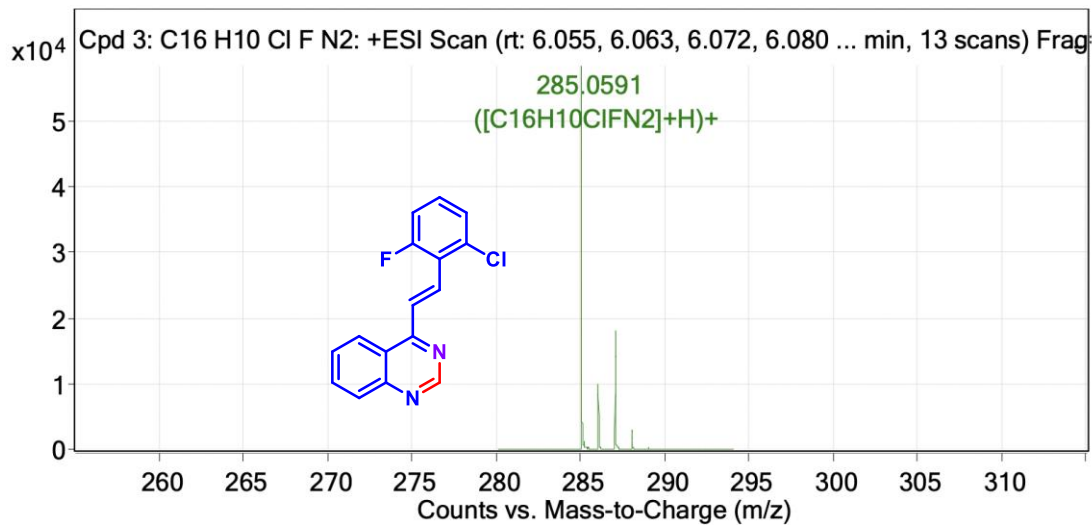

## MS Spectrum Peak List

| m/z      | Calc m/z | Diff(ppm) | z | Abund    | Formula                                           | Ion                |
|----------|----------|-----------|---|----------|---------------------------------------------------|--------------------|
| 285.0591 | 285.0589 | -0.75     | 1 | 58451.52 | C <sub>16</sub> H <sub>10</sub> ClFN <sub>2</sub> | (M+H) <sup>+</sup> |
| 286.0624 | 286.0621 | -1.06     | 1 | 10025.93 | C <sub>16</sub> H <sub>10</sub> ClFN <sub>2</sub> | (M+H) <sup>+</sup> |
| 287.0564 | 287.0564 | -0.06     | 1 | 18078.54 | C <sub>16</sub> H <sub>10</sub> ClFN <sub>2</sub> | (M+H) <sup>+</sup> |
| 288.0597 | 288.0592 | -1.48     | 1 | 3233.74  | C <sub>16</sub> H <sub>10</sub> ClFN <sub>2</sub> | (M+H) <sup>+</sup> |
| 289.062  | 289.0623 | 0.81      | 1 | 259.28   | C <sub>16</sub> H <sub>10</sub> ClFN <sub>2</sub> | (M+H) <sup>+</sup> |

--- End Of Report ---

# (E)-4-(3,4,5-Trimethoxystyryl)quinazoline (5i)

## <sup>1</sup>H NMR spectrum of 5i

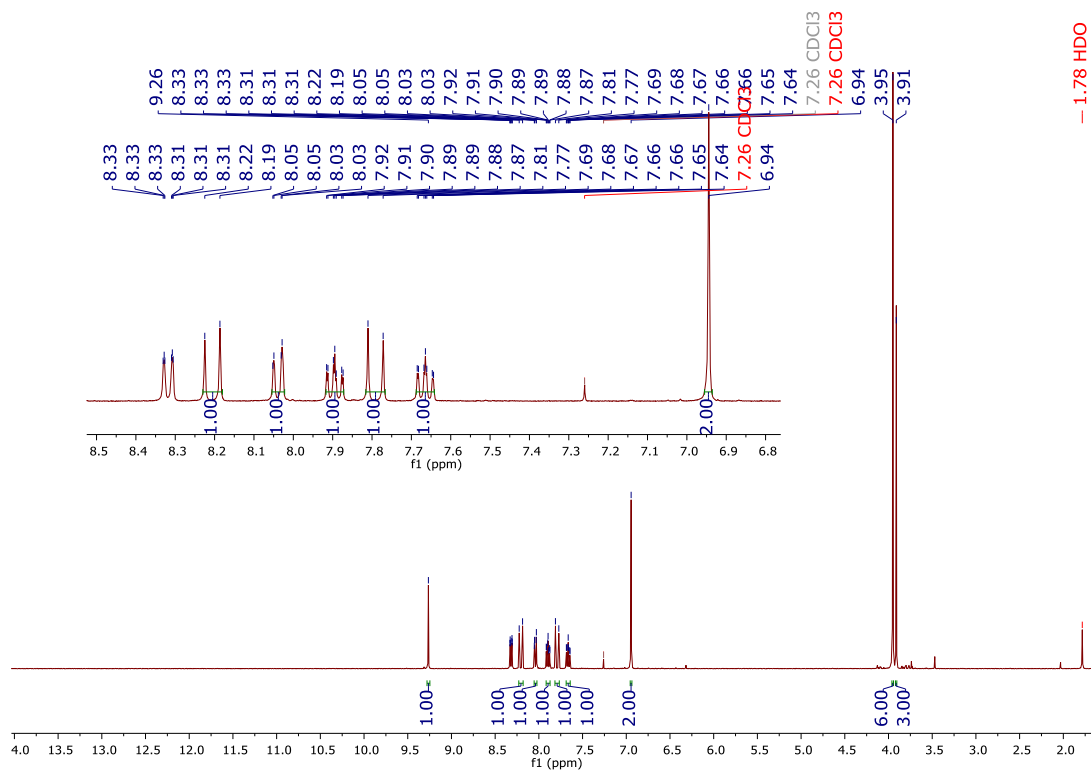

## <sup>13</sup>C NMR spectrum of 5i

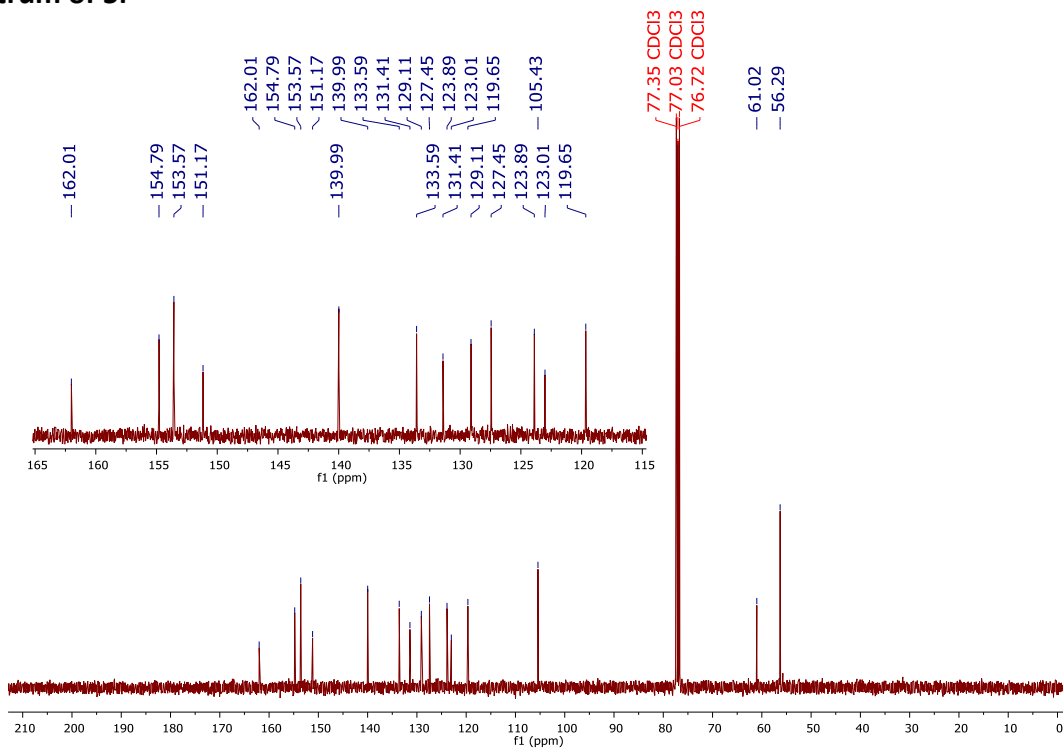

# Chromatogram and HRMS spectrum of 5i

## Compound Chromatograms

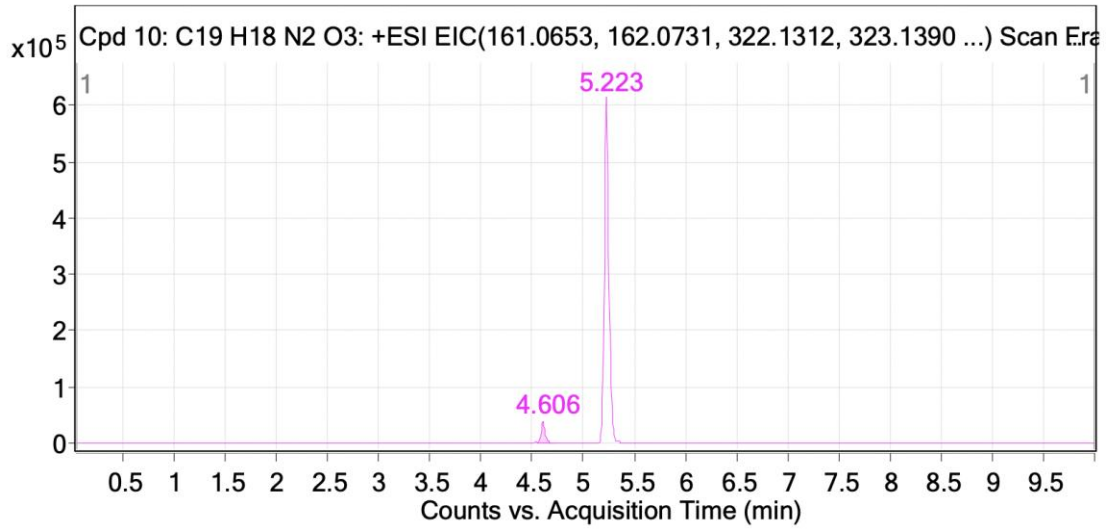

## MS Zoomed Spectrum

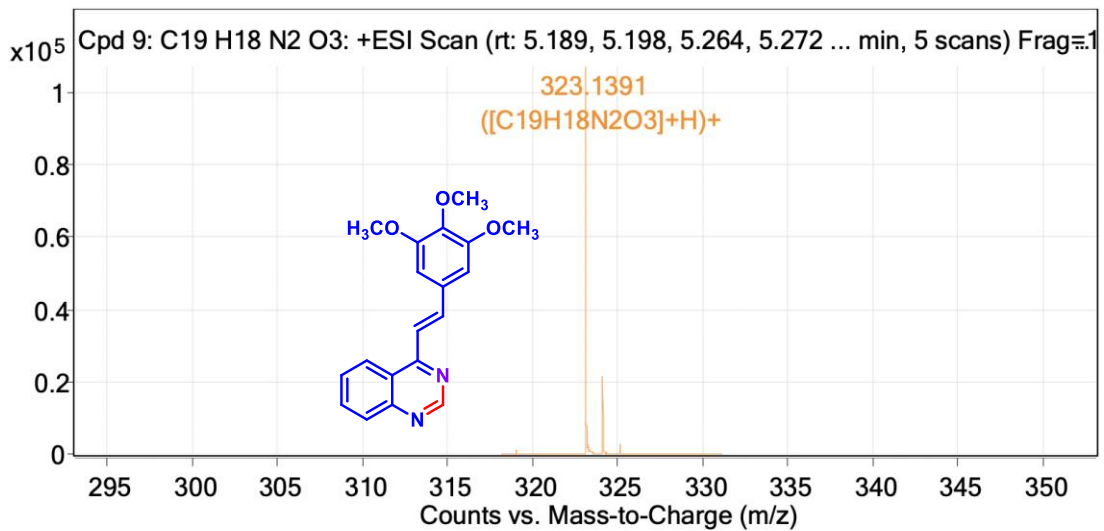

## MS Spectrum Peak List

| m/z      | Calc m/z | Diff(ppm) | z | Abund    | Formula                                                       | Ion                |
|----------|----------|-----------|---|----------|---------------------------------------------------------------|--------------------|
| 323.1391 | 323.139  | -0.34     | 1 | 111646   | C <sub>19</sub> H <sub>18</sub> N <sub>2</sub> O <sub>3</sub> | (M+H) <sup>+</sup> |
| 324.1423 | 324.1422 | -0.36     | 1 | 21860.79 | C <sub>19</sub> H <sub>18</sub> N <sub>2</sub> O <sub>3</sub> | (M+H) <sup>+</sup> |
| 325.145  | 325.1449 | -0.38     | 1 | 2756.37  | C <sub>19</sub> H <sub>18</sub> N <sub>2</sub> O <sub>3</sub> | (M+H) <sup>+</sup> |
| 326.1483 | 326.1475 | -2.3      | 1 | 274.53   | C <sub>19</sub> H <sub>18</sub> N <sub>2</sub> O <sub>3</sub> | (M+H) <sup>+</sup> |

--- End Of Report ---

# (E)-4-(2-(Thiophen-2-yl)vinyl)quinazoline (5j)

## <sup>1</sup>H NMR spectrum of 5j

KJ6.1.1.1r  
1H KLJP-12 en CDCl3

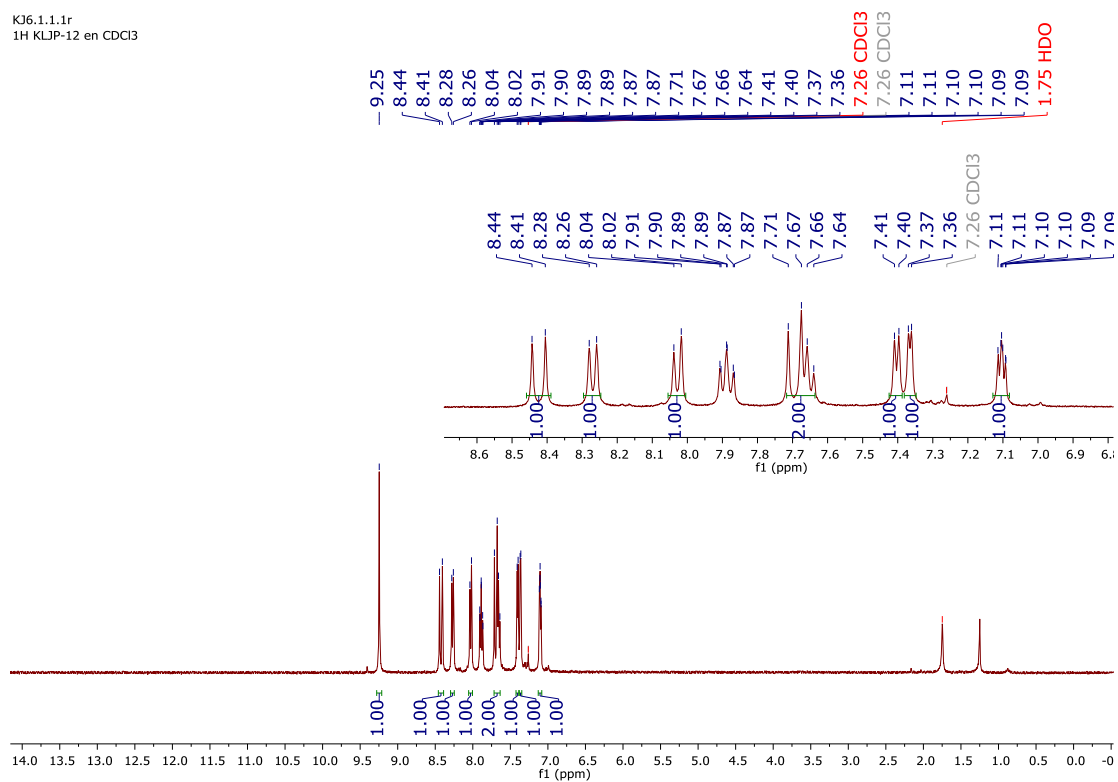

## <sup>13</sup>C NMR spectrum of 5j

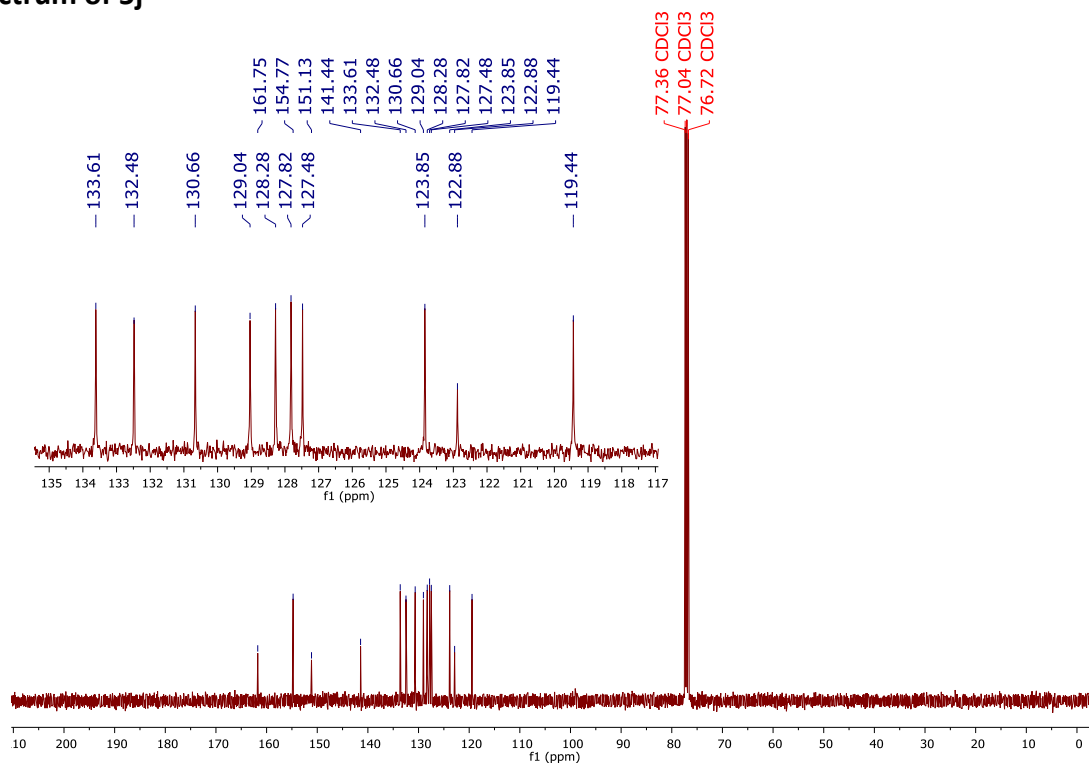

# HRMS spectrum of 5j

MS Zoomed Spectrum

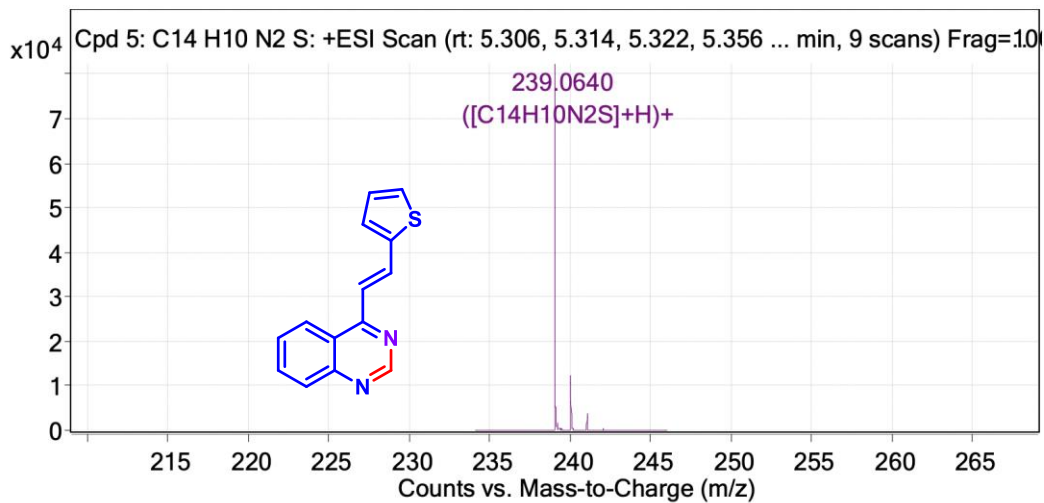

## MS Spectrum Peak List

| m/z      | Calc m/z | Diff(ppm) | z | Abund    | Formula                                          | Ion                |
|----------|----------|-----------|---|----------|--------------------------------------------------|--------------------|
| 239.064  | 239.0637 | -1.24     | 1 | 82875.63 | C <sub>14</sub> H <sub>10</sub> N <sub>2</sub> S | (M+H) <sup>+</sup> |
| 240.0671 | 240.0667 | -1.88     | 1 | 12353.96 | C <sub>14</sub> H <sub>10</sub> N <sub>2</sub> S | (M+H) <sup>+</sup> |
| 241.0622 | 241.0618 | -1.4      | 1 | 3852.07  | C <sub>14</sub> H <sub>10</sub> N <sub>2</sub> S | (M+H) <sup>+</sup> |

--- End Of Report ---

**Table 1S** Growth inhibitory percentage (GI%) of compounds **3** over all tested *in vitro* tumor cell lines.<sup>a</sup>

| Cancer cell<br>Lines Panel        | Growth Inhibition Percentage (GI %) of compounds <b>3</b> |                 |                 |                 |                 |                 |                 |                 |                 |                 |                 |                 |                 |                 |                 |
|-----------------------------------|-----------------------------------------------------------|-----------------|-----------------|-----------------|-----------------|-----------------|-----------------|-----------------|-----------------|-----------------|-----------------|-----------------|-----------------|-----------------|-----------------|
|                                   | 3a <sup>b</sup>                                           | 3b <sup>c</sup> | 3c <sup>d</sup> | 3d <sup>e</sup> | 3e <sup>f</sup> | 3f <sup>g</sup> | 3g <sup>h</sup> | 3h <sup>i</sup> | 3i <sup>j</sup> | 3j <sup>k</sup> | 3k <sup>l</sup> | 3l <sup>m</sup> | 3m <sup>n</sup> | 3n <sup>o</sup> | 3o <sup>p</sup> |
| <b>Leukemia</b>                   |                                                           |                 |                 |                 |                 |                 |                 |                 |                 |                 |                 |                 |                 |                 |                 |
| CCRF-CEM                          | 4.26                                                      | 17.37           | 9.78            | 0.00            | 14.58           | 30.15           | 29.80           | 0.00            | 3.75            | 0.00            | 0.00            | 0.00            | 0.00            | 6.03            | 0.00            |
| HL-60(TB)                         | 9.25                                                      | 24.15           | 12.11           | 0.00            | 17.11           | 29.18           | 30.19           | 12.96           | 0.00            | 0.00            | 0.00            | 9.9             | 0.00            | 0.00            | 0.00            |
| K-562                             | 8.86                                                      | 11.02           | 12.18           | 5.38            | 39.97           | 31.10           | 35.38           | 12.28           | 11.37           | 3.60            | 0.00            | 0.00            | 1.89            | 9.42            | 1.69            |
| MOLT-4                            | 14.59                                                     | 33.11           | 6.29            | 7.85            | 37.85           | 42.23           | 41.90           | 8.32            | 17.25           | 0.00            | 14.17           | 0.00            | 3.38            | 7.25            | 0.00            |
| RPMI-8226                         | 0.00                                                      | 1.27            | 13.42           | 4.10            | 28.47           | 19.90           | 35.29           | 12.12           | 1.24            | 9.32            | 0.00            | 0.00            | 0.00            | 0.00            | 0.00            |
| SR                                | 20.48                                                     | 7.77            | NT              | 0.00            | 33.83           | 34.20           | 46.53           | 26.31           | 4.90            | 5.91            | 10.93           | 0.01            | 0.00            | 10.56           | 0.00            |
| <b>Non-Small Cell Lung Cancer</b> |                                                           |                 |                 |                 |                 |                 |                 |                 |                 |                 |                 |                 |                 |                 |                 |
| A549/ATCC                         | 12.3                                                      | 11.75           | 18.30           | 0.00            | 24.07           | 40.18           | 45.63           | 10.84           | 0.00            | 9.54            | 9.42            | 0.00            | 0.00            | 0.00            | 15.17           |
| EKVX                              | 0.00                                                      | 9.45            | 15.83           | 12.90           | 9.16            | 39.19           | 48.72           | 2.68            | 8.19            | 0.00            | 0.00            | 10.29           | 7.77            | 8.88            | 0.40            |
| HOP-62                            | 0.00                                                      | 0.00            | 67.96           | 4.01            | 0.00            | 43.23           | 47.07           | 0.00            | 0.00            | 0.00            | 0.00            | 3.95            | 0.00            | 0.00            | 0.00            |
| HOP-92                            | 0.00                                                      | 0.00            | 57.59           | 0.00            | 0.00            | 59.98           | 61.72           | 0.00            | 0.00            | 0.00            | 0.00            | 0.00            | 0.00            | 4.57            | 0.00            |
| NCI-H226                          | 0.00                                                      | 0.00            | 78.69           | 3.40            | 2.97            | 45.35           | 59.23           | 6.71            | 0.03            | 5.15            | 6.31            | 0.00            | 2.85            | 0.00            | 0.00            |
| NCI-H23                           | 6.72                                                      | 0.54            | 38.62           | 10.41           | 11.12           | 41.24           | 43.21           | 4.48            | 3.65            | 3.97            | 0.00            | 0.00            | 5.16            | 0.00            | 2.76            |
| NCI-H322M                         | 3.46                                                      | 0.00            | 26.95           | 1.18            | 5.15            | 14.34           | 19.36           | 0.00            | 6.34            | 0.00            | 0.00            | 6.13            | 6.9             | 0.00            | 0.00            |
| NCI-H460                          | 1.65                                                      | 4.59            | 50.95           | 0.00            | 17.51           | 40.01           | 40.08           | 0.00            | 0.00            | 0.00            | 0.00            | 0.00            | 0.00            | 0.00            | 0.00            |
| NCI-H522                          | 8.48                                                      | 11.58           | 36.84           | 4.43            | 20.15           | 45.13           | 46.42           | 29.67           | 4.60            | 0.00            | 28.46           | 4.16            | 3.35            | -26.93          | 25.97           |
| <b>Colon Cancer</b>               |                                                           |                 |                 |                 |                 |                 |                 |                 |                 |                 |                 |                 |                 |                 |                 |
| COLO 205                          | 0.00                                                      | 0.00            | 0.00            | 21.15           | 15.06           | 40.76           | 43.16           | 0.21            | 24.80           | 0.00            | 0.00            | 0.00            | 0.00            | 0.00            | 0.00            |
| HCC-2998                          | 0.00                                                      | 0.00            | 9.87            | 0.00            | 0.23            | 18.92           | 17.41           | 0.00            | 0.00            | 0.00            | 0.00            | 4.56            | 0.00            | 0.00            | 0.00            |
| HCT-116                           | 5.37                                                      | 13.30           | 63.36           | 5.89            | 23.24           | 40.23           | 44.03           | 11.01           | 2.95            | 0.28            | 10.14           | 6.03            | 0.00            | 24.56           | 6.60            |
| HCT-15                            | 15.02                                                     | 12.23           | 11.69           | 20.90           | 42.31           | 40.34           | 38.24           | 0.08            | 9.73            | 0.00            | 0.00            | 0.00            | 4.66            | 16.53           | 0.00            |
| HT29                              | 13.68                                                     | 14.94           | 26.33           | 0.00            | 20.35           | 43.34           | 41.23           | 13.51           | 0.00            | 11.24           | 19.46           | 0.00            | 0.00            | 6.07            | 16.85           |
| KM12                              | 7.22                                                      | 2.16            | 16.64           | 13.43           | 39.39           | 10.23           | 12.41           | 9.25            | 6.50            | 2.25            | 1.40            | 0.00            | 3.81            | 2.73            | 0.00            |
| SW-620                            | 3.46                                                      | 0.80            | 8.43            | 0.05            | 0.00            | 21.56           | 22.38           | 7.20            | 0.00            | 0.00            | 0.00            | 0.00            | 0.06            | 4.34            | 0.00            |
| <b>CNS Cancer</b>                 |                                                           |                 |                 |                 |                 |                 |                 |                 |                 |                 |                 |                 |                 |                 |                 |

|                       |       |       |       |       |       |       |       |       |       |       |       |       |       |       |       |
|-----------------------|-------|-------|-------|-------|-------|-------|-------|-------|-------|-------|-------|-------|-------|-------|-------|
| SF-268                | 3.23  | 0.65  | 48.77 | 0.15  | 3.05  | 27.45 | 29.91 | 2.44  | 2.24  | 0.00  | 6.99  | 0.00  | 4.63  | 0.00  | 0.00  |
| SF-295                | 0.00  | 5.25  | 85.18 | 0.00  | 0.00  | 45.17 | 49.81 | 0.00  | 0.00  | 0.00  | 0.00  | 0.00  | 0.00  | 0.00  | 0.00  |
| SF-539                | 2.33  | 0.00  | 73.02 | 1.54  | 2.40  | 30.14 | 31.57 | 6.58  | 0.00  | 6.79  | 5.05  | 4.13  | 1.79  | 1.38  | 1.21  |
| SNB-19                | 0.00  | 0.00  | 76.78 | 0.00  | 5.14  | 30.24 | 29.15 | 0.00  | 1.15  | 3.64  | 0.00  | 0.00  | 0.25  | 0.00  | 0.00  |
| SNB-75                | NT    | 5.37  | 98.89 | NT    | NT    | NT    | NT    | 13.93 | NT    | 10.47 | 13.02 | 0.00  | NT    | 0.00  | 12.36 |
| U251                  | 0.00  | 0.00  | 54.18 | 0.00  | 10.21 | 41.78 | 34.13 | 3.48  | 0.00  | 0.00  | 0.00  | 0.00  | 0.00  | 0.00  | 0.00  |
| <b>Melanoma</b>       |       |       |       |       |       |       |       |       |       |       |       |       |       |       |       |
| LOX IMVI              | 5.25  | 12.5  | 22.14 | 15.28 | 27.11 | 50.13 | 56.80 | 7.10  | 12.81 | 3.30  | 8.48  | 11.82 | 8.03  | 8.81  | 7.73  |
| MALME-3M              | 0.00  | 0.00  | 21.75 | 3.09  | 4.98  | 6.43  | 3.41  | 0.00  | 6.46  | 0.00  | 0.00  | 0.13  | 1.66  | 0.00  | 0.00  |
| M14                   | 0.00  | 6.42  | 20.02 | 0.00  | 30.38 | 10.10 | 11.09 | 9.23  | 7.69  | 4.05  | 4.21  | 3.10  | 0.00  | 12.25 | 0.00  |
| MDA-MB-435            | 3.40  | 0.00  | 13.93 | 3.41  | 19.37 | 20.27 | 18.45 | 14.35 | 4.76  | 6.74  | 4.34  | 0.00  | 4.41  | 0.00  | 0.00  |
| SK-MEL-2              | NT    | 0.00  | 9.58  | NT    | NT    | NT    | NT    | 12.36 | NT    | 11.70 | 9.35  | 0.00  | NT    | 0.00  | 2.67  |
| SK-MEL-28             | 0.00  | 0.00  | 8.65  | 0.00  | 3.8   | 11.70 | 11.68 | 0.00  | 1.56  | 0.00  | 0.00  | 0.00  | 0.00  | 0.00  | 0.00  |
| SK-MEL-5              | 0.16  | 4.80  | 42.77 | 2,95  | 87.92 | 16.98 | 13.05 | 1.23  | 0.00  | 4.93  | 7.34  | 0.00  | 0.78  | 0.00  | 3.66  |
| UACC-257              | 0.00  | 0.00  | 0.69  | 0.00  | 0.00  | 23.48 | 22.57 | 5.74  | 0.00  | 11.96 | 5.86  | 0.00  | 0.00  | 0.00  | 5.42  |
| UACC-62               | 13.30 | 13.11 | 29.85 | 12.33 | 15.97 | 50.50 | 50.45 | NT    | 24.50 | NT    | NT    | 13.24 | 20.43 | 20.31 | NT    |
| <b>Ovarian Cancer</b> |       |       |       |       |       |       |       |       |       |       |       |       |       |       |       |
| IGROV1                | 0.00  | 0.00  | 34.47 | 10.41 | 0.00  | 21.20 | 20.93 | 0.00  | 1.91  | 0.00  | 0.00  | 3.48  | 3.16  | 0.00  | 0.00  |
| OVCAR-3               | NT    | 0.00  | 11.99 | NT    | NT    | 17.21 | 19.01 | 0.00  | NT    | 0.00  | 0.00  | 0.00  | NT    | 0.00  | 0.00  |
| OVCAR-4               | 7.55  | 0.61  | 74.82 | 0.00  | 9.67  | 35.98 | 39.85 | 9.30  | 7.41  | 7.88  | 1.08  | 0.00  | 1.06  | 0.00  | 0.00  |
| OVCAR-5               | 0.00  | 0.00  | 2.58  | 0.00  | 0.00  | 5.37  | 5.36  | 0.00  | 0.26  | 0.00  | 11.55 | 6.69  | 4.21  | 0.00  | 0.00  |
| OVCAR-8               | 0.00  | 0.00  | 84.52 | 0.00  | 19.29 | 4.89  | 4.79  | 2.38  | 0.00  | 0,38  | 0.00  | 0.00  | 0.00  | 0.00  | 0.00  |
| NCI/ADR-RES           | 0.00  | 0.20  | 60.21 | 0.00  | 34.03 | 44.35 | 40.17 | 0.00  | 0.00  | 0.00  | 1.53  | 0.00  | 0.00  | 1.59  | 1.63  |
| SK-OV-3               | 0.00  | 0.00  | 83.26 | 0.00  | 0.00  | 10.56 | 13.33 | 0.00  | 0.39  | 0.00  | 0.00  | 0.00  | 0.00  | 0.00  | 0.00  |
| <b>Renal Cancer</b>   |       |       |       |       |       |       |       |       |       |       |       |       |       |       |       |
| 786-0                 | 8.7   | 13.92 | -6.57 | 0.00  | 8.21  | 16.45 | 16.35 | 1.37  | 0.00  | 0.00  | 6.32  | 5.79  | 0.00  | 7.53  | 0.00  |
| A498                  | 0.00  | 0.00  | 34.47 | 0.00  | 0.00  | 5.90  | 0.00  | 0.00  | 0.00  | 0.00  | 0.00  | NT    | 0.00  | NT    | 0.00  |
| ACHN                  | 0.00  | 0.00  | 64.71 | 9.45  | 10.22 | 40.19 | 44.84 | 2.52  | 6.56  | 0.00  | 0.00  | 0.00  | 0.00  | 0.00  | 0.57  |
| CAKI-1                | 20.58 | 7.98  | 45.96 | 28.61 | 27.51 | 30.45 | 36.44 | 27.36 | 30.17 | 23.47 | 27.71 | 21.01 | 18.26 | 30.61 | 19.00 |
| RXF 393               | 0.00  | 0.00  | 96.43 | 0.00  | 11.86 | 40.10 | 40.26 | 0.00  | 0.00  | 0.00  | 0.00  | 0.00  | 0.00  | 0.00  | 0.00  |

|                                 |             |             |              |             |              |              |              |             |             |             |             |             |             |             |             |
|---------------------------------|-------------|-------------|--------------|-------------|--------------|--------------|--------------|-------------|-------------|-------------|-------------|-------------|-------------|-------------|-------------|
| SN12C                           | 3.82        | 4.15        | 22.47        | 13.35       | 13.77        | 34.67        | 30.75        | 10.96       | 12.68       | 13.71       | 17.94       | 0.01        | 6.19        | 3.11        | 13.76       |
| TK-10                           | 0.00        | 0.95        | 33.08        | 0.00        | 0.00         | 20.13        | 18.54        | 0.00        | 0.00        | 0.00        | 4.39        | 0.00        | 0.00        | 0.00        | 0.00        |
| UO-31                           | 4.60        | 10.03       | NT           | 30.74       | 11.21        | NT           | NT           | 14.68       | 18.79       | 6.16        | 10.52       | 8.09        | 14.52       | 8.17        | 1.07        |
| <b>Prostate Cancer</b>          |             |             |              |             |              |              |              |             |             |             |             |             |             |             |             |
| PC-3                            | 0.00        | 0.00        | 22.44        | 0.00        | 42.18        | 29.66        | 30.06        | 0.00        | 0.00        | 0.00        | 0.00        | 0.00        | 0.00        | 2.44        | 0.00        |
| DU-145                          | 0.00        | 0.00        | 8.94         | 0.00        | 8.65         | 34.12        | 29.48        | 0.32        | 0.00        | 0.00        | 1.11        | 0.00        | 0.00        | 0.00        | 0.00        |
| <b>Breast Cancer</b>            |             |             |              |             |              |              |              |             |             |             |             |             |             |             |             |
| MCF7                            | 11.66       | 13.52       | 37.9         | 32.70       | 18.75        | 67.90        | 60.98        | 15.68       | 24.78       | 18.22       | 7.29        | 11.03       | 21.89       | 23.16       | 21.20       |
| MDA-MB-231/ATCC                 | 0.00        | 0.00        | NT           | 36.83       | 17.85        | NT           | NT           | 1.27        | 18.73       | 5.58        | 3.78        | 7.16        | 9.42        | 0.82        | 6.92        |
| HS 578T                         | 0.00        | 0.95        | 79.18        | 0.00        | 0.00         | 36.31        | 30.90        | 0.00        | 0.00        | 0.00        | 0.00        | 0.00        | 0.00        | 0.00        | 0.00        |
| BT-549                          | 0.00        | 0.00        | 26.07        | 0.00        | 8.78         | 20.20        | 17.07        | 0.00        | 0.00        | 0.00        | 0.00        | 1.94        | 0.00        | 0.00        | 0.00        |
| T-47D                           | 23.46       | 23.64       | 21.91        | 31.13       | 44.99        | 45.34        | 49.54        | 9.45        | 19.65       | 13.63       | 9.79        | 8.70        | 13.83       | 20.32       | 0.89        |
| MDA-MB-468                      | 7.76        | 8.91        | 29.84        | 1.26        | 28.07        | 80.23        | 81.29        | 14.12       | 5.95        | 0.00        | 0.00        | 15.44       | 1.62        | 14.12       | 0.00        |
| <b>GI<sub>average</sub> (%)</b> | <b>0.10</b> | <b>1.71</b> | <b>37.88</b> | <b>1.64</b> | <b>14.20</b> | <b>30.18</b> | <b>32.73</b> | <b>2.24</b> | <b>2.06</b> | <b>0.00</b> | <b>0.00</b> | <b>0.00</b> | <b>0.00</b> | <b>0.78</b> | <b>0.00</b> |

<sup>a</sup> Data obtained from NCIs *in vitro* disease-oriented human tumor cell screen; <sup>b</sup> NSC 840320; <sup>c</sup> NSC 840759; <sup>d</sup> NSC 838452; <sup>e</sup> NSC 840324; <sup>f</sup> NSC 840325; <sup>g</sup> NSC 846822; <sup>h</sup> NSC 838911; <sup>i</sup> NSC 846819; <sup>j</sup> NSC 840323; <sup>k</sup> NSC 846825; <sup>l</sup> NSC 846820; <sup>m</sup> NSC 840763; <sup>n</sup> NSC 840322; <sup>o</sup> NSC 840764; <sup>p</sup> NSC 846824; NT, Not tested.



**Table 2S** Growth inhibitory percentage (GI%) of compounds **5** over all tested *in vitro* tumor cell lines.<sup>a</sup>

| Cancer cell lines panel <sup>a</sup> | Growth Inhibition Percentage (GI %) of compounds <b>5</b> |                 |                 |                 |                 |                 |                 |                 |                 |                 |
|--------------------------------------|-----------------------------------------------------------|-----------------|-----------------|-----------------|-----------------|-----------------|-----------------|-----------------|-----------------|-----------------|
|                                      | 5a <sup>b</sup>                                           | 5b <sup>c</sup> | 5c <sup>d</sup> | 5d <sup>e</sup> | 5e <sup>f</sup> | 5f <sup>g</sup> | 5g <sup>h</sup> | 5h <sup>i</sup> | 5i <sup>j</sup> | 5j <sup>k</sup> |
| <b>Leukemia</b>                      |                                                           |                 |                 |                 |                 |                 |                 |                 |                 |                 |
| CCRF–CEM                             | 14.56                                                     | 69.76           | 78.02           | 89.16           | 67.84           | 28.93           | 35.59           | 59.20           | 58.08           | 0.00            |
| HL–60(TB)                            | 89.33                                                     | 84.60           | –8.73           | –27.57          | 75.07           | 61.45           | 39.74           | 58.02           | 79.50           | 14.98           |
| K–562                                | 59.51                                                     | 92.99           | 88.85           | 98,2            | 82.02           | 52.30           | 44.62           | 71.54           | 86.51           | 21.53           |
| MOLT–4                               | 64.88                                                     | 65.58           | 72.39           | –1.65           | 41.03           | 43.95           | 42.14           | 47.67           | 73.46           | 10.54           |
| RPMI–8226                            | 61,89                                                     | 66.39           | 68.92           | 83.89           | 72.81           | 52.30           | 36.27           | 73.24           | 64.30           | 33.14           |
| SR                                   | 38.11                                                     | NT              | NT              | 95.4            | 70.89           | 57.53           | 55.01           | NT              | 92.94           | 18.35           |
| <b>Non-Small Cell Lung Cancer</b>    |                                                           |                 |                 |                 |                 |                 |                 |                 |                 |                 |
| A549/ATCC                            | 34.77                                                     | 47.30           | 72.00           | 89.94           | 68.19           | 35.57           | 31.03           | 26.11           | 42.32           | 23.72           |
| EKVX                                 | 42.48                                                     | 56.18           | 59.54           | 64.39           | 60.71           | 52.44           | 48.41           | 45.12           | 67.93           | 44.52           |
| HOP–62                               | 3.19                                                      | 27.08           | 76.42           | 70.17           | 31.95           | 21.71           | 23.94           | 16.26           | 41.12           | 8.66            |
| HOP–92                               | 31.67                                                     | 40.12           | 46.08           | 80.85           | 45.41           | 50.08           | 0.00            | 18.95           | 67.86           | 3.20            |
| NCI–H226                             | 26.22                                                     | 32.94           | 71.37           | –43.90          | 43.46           | 36.84           | 0.00            | 22.63           | 57.15           | 0.00            |
| NCI–H23                              | 13.97                                                     | 49.48           | 96.21           | –14.17          | 54.07           | 37.41           | 25.91           | 28.64           | 68.09           | 1.26            |
| NCI–H322M                            | 3.97                                                      | 43.98           | 87.24           | 86.38           | 56.89           | 23.93           | 14.35           | 22.63           | 41.27           | 8.80            |
| NCI–H460                             | 40.03                                                     | 43.53           | 74.56           | 81.64           | 65.22           | 17.44           | 22.47           | 22.76           | 47.67           | 3.05            |
| NCI–H522                             | 49.84                                                     | 60.70           | 61.45           | –16.27          | 77.34           | 44.01           | 43.66           | 35.31           | 78.42           | 39.50           |
| <b>Colon cancer</b>                  |                                                           |                 |                 |                 |                 |                 |                 |                 |                 |                 |
| COLO 205                             | 19.5                                                      | 22.21           | –57.00          | –71.21          | 46.50           | 53.61           | 10.71           | 0.00            | 47.67           | 0.00            |
| HCC–2998                             | 25.46                                                     | 11.59           | 67.11           | 99.96           | 87.64           | 13.31           | 0.00            | 0.00            | 36.30           | 0.00            |
| HCT–116                              | 61.27                                                     | 65.71           | 96.31           | 78.85           | 65.08           | 40.94           | 40.40           | 42.32           | 60.91           | 9.33            |
| HCT–15                               | 47.4                                                      | 76.62           | 92.93           | 76.81           | 76.76           | 50.57           | 31.32           | 44.73           | 65.83           | 19.87           |
| HT29                                 | 54.69                                                     | 54.85           | 75.91           | 90.60           | 60.90           | 24.03           | 17.35           | 18.29           | 54.42           | 9.99            |
| KM12                                 | 37.4                                                      | 68.11           | 92.35           | 89.92           | 88.36           | 19.82           | 33.99           | 25.35           | 21.52           | 10.28           |
| SW–620                               | 27.5                                                      | 71.54           | 99.58           | 96.99           | 79.37           | 31.36           | 16.08           | 24.37           | 58.07           | 0.00            |
| <b>CNS cancer</b>                    |                                                           |                 |                 |                 |                 |                 |                 |                 |                 |                 |
| SF–268                               | 18.38                                                     | 32.67           | 42.76           | 66.16           | 59.33           | 13.56           | 25.58           | 30.08           | 40.73           | 20.48           |

|                       |       |       |       |        |       |       |       |       |       |       |
|-----------------------|-------|-------|-------|--------|-------|-------|-------|-------|-------|-------|
| SF-295                | 22.69 | 34.02 | 52.23 | 78.03  | 39.18 | 35.64 | 0.00  | 21.03 | 24.75 | 0.00  |
| SF-539                | 5.47  | 50.60 | 88.86 | -3.62  | 60.36 | 12.02 | 15.88 | 15.90 | 50.84 | 15.19 |
| SNB-19                | 14.27 | 37.88 | 51.32 | 86.17  | 47.99 | 28.25 | 0.00  | 18.48 | 34.06 | 17.10 |
| SNB-75                | 0.00  | 61.96 | NT    | -13.87 | 88.14 | NT    | 50.29 | 28.49 | NT    | 35.61 |
| U251                  | 23.24 | 63.40 | 77.50 | 94.69  | 69.30 | 48.61 | 21,2  | 28.61 | 59.70 | 15.17 |
| <b>Melanoma</b>       |       |       |       |        |       |       |       |       |       |       |
| LOX IMVI              | 19.37 | 54.72 | 81.63 | -7.92  | 65.36 | 57.55 | 36.65 | 43.41 | 63.37 | 21.41 |
| MALME-3M              | 0.00  | 33.46 | 39.36 | 36.25  | 2.60  | 12.02 | 0.00  | 13.52 | 44.25 | 0.00  |
| M14                   | 15.15 | 46.10 | 77.55 | 65.59  | 33.80 | 25.42 | 16.02 | 25.82 | 33.29 | 4.98  |
| MDA-MB-435            | 20.12 | 78.45 | 84.31 | 81.73  | 68.48 | 17.61 | 32.45 | 26.26 | 54.74 | 2.97  |
| SK-MEL-2              | 20.01 | 59.93 | NT    | -38.41 | 53.75 | NT    | 21.42 | 20.06 | NT    | 2.08  |
| SK-MEL-28             | 10.59 | 20.44 | 45.31 | 45.11  | 12.00 | 6.10  | 3.44  | 0.00  | 20.06 | 0.00  |
| SK-MEL-5              | 27.65 | 55.02 | 43.33 | 78.99  | 37.38 | 11.49 | 16.19 | 25.17 | 27.61 | 9.76  |
| UACC-257              | 8.53  | 30.89 | 41.90 | 49.34  | 22.02 | 30.42 | 17.21 | 20.52 | 49.97 | 13.85 |
| UACC-62               | 30.53 | 57.70 | 82.74 | -11.68 | NT    | 50.34 | 45.95 | 43.82 | 57.52 | NT    |
| <b>Ovarian cancer</b> |       |       |       |        |       |       |       |       |       |       |
| IGROV1                | 13.48 | 25.28 | 55.31 | 69.89  | 88.49 | 18.90 | 6.48  | 5.33  | 25.79 | 29.27 |
| OVCAR-3               | 15.42 | 62.91 | NT    | -21.85 | 91.46 | 32.35 | 20.38 | 36.23 | 52.97 | 5.42  |
| OVCAR-4               | 27.06 | 23.17 | 59.61 | 80.28  | 62.11 | 22.67 | 28.44 | 23.82 | 55.27 | 8.01  |
| OVCAR-5               | 7.64  | 20.38 | 92.98 | 88.94  | 59.48 | 8.27  | 13.02 | 0.00  | 20.91 | 0.00  |
| OVCAR-8               | 21.65 | 44.54 | 88.44 | -7.54  | 50.28 | 22.78 | 27.6  | 25.41 | 42.40 | 7.04  |
| NCI/ADR-RES           | NT    | 68.54 | -6.38 | -35.29 | 72.26 | 28.97 | NT    | 33.75 | 70.50 | 11.57 |
| SK-OV-3               | 23.41 | 38.53 | 49.52 | 64.64  | 35.10 | 8.58  | 84.77 | 14.23 | 51.74 | 1.17  |
| <b>Renal cancer</b>   |       |       |       |        |       |       |       |       |       |       |
| 786-0                 | 0.00  | 33.58 | 64.96 | 75.05  | 35.42 | 8.94  | 6.56  | 8.81  | 29.80 | 0.00  |
| A498                  | 20.58 | 0.00  | 0.00  | 45.33  | 0.00  | 0.00  | 0.00  | 0.00  | 10.86 | 0.00  |
| ACHN                  | 20.56 | 50.67 | 73.70 | 87.54  | 62.53 | 45.06 | 23.08 | 25.34 | 58.15 | 17.14 |
| CAKI-1                | 38.94 | 41.92 | 65.27 | 93.98  | 84.12 | 27.44 | 43.95 | 15.78 | 47.26 | 29.88 |
| RXF 393               | 1.70  | 46.05 | 83.45 | 87.85  | 40.53 | 4.52  | 37.83 | 0.82  | 77.80 | 0.00  |
| SN12C                 | 29.27 | 48.04 | 78.61 | 93.89  | 66.87 | 44.71 | 42.46 | 15.15 | 52.67 | 20.59 |

|                                 |       |        |        |        |        |       |       |       |       |       |
|---------------------------------|-------|--------|--------|--------|--------|-------|-------|-------|-------|-------|
| TK-10                           | 0.00  | 0.00   | 22.79  | 85.35  | 70.75  | 0.78  | 0.00  | 0.00  | 44.77 | 0.00  |
| UO-31                           | 48.32 | NT     | 74.00  | 82.20  | 46.29  | NT    | 24.19 | NT    | NT    | 33.04 |
| <b>Prostate cancer</b>          |       |        |        |        |        |       |       |       |       |       |
| PC-3                            | 65.43 | 54.53  | 93.58  | 65.11  | 51.66  | 47.00 | 12.15 | 34.43 | 47.51 | 3.18  |
| DU-145                          | 0.00  | 54.11  | 85.25  | 85.19  | 86.45  | 17.14 | 31.77 | 35.49 | 55.69 | 16.2  |
| <b>Breast cancer</b>            |       |        |        |        |        |       |       |       |       |       |
| MCF7                            | 49.03 | 70.23  | 89.16  | 82.44  | 95.75  | 64.88 | 50.47 | 63.28 | 70.27 | 48.66 |
| MDA-MB-231/ATCC                 | 18.49 | NT     | 92.85  | -11.52 | 43.26  | NT    | 40.69 | NT    | 50.39 | 18.86 |
| HS 578T                         | 12.91 | 38.63  | 25.55  | 84.10  | 51.7   | 16.66 | 32.29 | 21.79 | 73.51 | 11.92 |
| BT-549                          | 21.68 | 83.29  | 70.40  | 90.46  | 71.71  | 17.21 | 24.52 | 29.80 | 57.43 | 6.07  |
| T-47D                           | 69.07 | 69.74  | 77.45  | 98.98  | 95.40  | 57.55 | 91.94 | 51.17 | NT    | 65.78 |
| MDA-MB-468                      | 16.87 | -38.00 | -20.52 | -39.18 | -35.82 | 49.38 | 75.66 | 87.21 | 0.00  | 39.96 |
| <b>GI<sub>average</sub> (%)</b> | 26.00 | 50.26  | 73.52  | 91.37  | 60.48  | 30.19 | 26.20 | 25.61 | 53.44 | 10.69 |

<sup>a</sup>Data obtained from NCI's *in vitro* disease-oriented human tumor cell screen; <sup>b</sup> NSC 839195; <sup>c</sup> NSC 838449; <sup>d</sup> NSC 840315; <sup>e</sup> NSC 847835; <sup>f</sup> NSC 846817; <sup>g</sup> NSC 838910; <sup>h</sup> NSC 839196; <sup>i</sup> NSC 838448; <sup>j</sup> NSC 838908; <sup>k</sup> NSC 846816; NT, Not tested.
